1       **Covid-19 Exposure Assessment Tool (CEAT): Easy-to-use tool to quantify exposure**  
2       **based on airflow, group behavior, and infection prevalence in the community**

3  
4       Brian J. Schimmoller<sup>1,2,12\*</sup>, Nidia S. Trovão<sup>2,3</sup>, Molly Isbell<sup>1</sup>, Chirag Goel<sup>2,4</sup>, Benjamin F.  
5       Heck<sup>5</sup>, Tenley C. Archer<sup>2,6</sup>, Klint D. Cardinal<sup>7</sup>, Neil B. Naik<sup>7</sup>, Som Dutta<sup>2,8</sup>, Ahleah Rohr  
6       Daniel<sup>9</sup>, Afshin Beheshti<sup>2,10,11,12\*</sup>

7  
8       <sup>1</sup>Signature Science LLC, Austin, TX, 78759, USA

9       <sup>2</sup>COVID-19 International Research Team

10      <sup>3</sup>Fogarty International Center, National Institutes of Health, Bethesda, Maryland, USA

11      <sup>4</sup>Northwestern University Feinberg School of Medicine, Chicago, IL, 60611, USA

12      <sup>5</sup>Bastion Technologies, NASA Ames Research Center, Moffett Field, CA, 94035, USA

13      <sup>6</sup>Biomea Fusion, Inc. Redwood City, CA, 94063, USA

14      <sup>7</sup>Leidos, Inc., NASA Ames Research Center, Moffett Field, CA, 94035, USA

15      <sup>8</sup>Mechanical & Aerospace Engineering, Utah State University, Logan, UT 84332, USA

16      <sup>9</sup>Space Biosciences Division, NASA Ames Research Center, Moffett Field, CA, 94035, USA

17      <sup>10</sup>KBR, Space Biosciences Division, NASA Ames Research Center, Moffett Field, CA, 94035,  
18      USA

19      <sup>11</sup>Stanley Center for Psychiatric Research, Broad Institute of MIT and Harvard, Cambridge,  
20      MA, 02142, USA

21      <sup>12</sup>Lead Contacts

22      \*Correspondence: [bschimmoller@signaturescience.com](mailto:bschimmoller@signaturescience.com) and [afshin.beheshti@nasa.gov](mailto:afshin.beheshti@nasa.gov)

23  
24  
25      **Summary**

26      The COVID-19 Exposure Assessment Tool (CEAT) allows users to compare respiratory  
27      relative risk to SARS-CoV-2 for various scenarios, providing understanding of how  
28      combinations of protective measures affect exposure, dose, and risk. CEAT incorporates  
29      mechanistic, stochastic and epidemiological factors including the: 1) emission rate of virus, 2)  
30      viral aerosol degradation and removal, 3) duration of activity/exposure, 4) inhalation rates, 5)  
31      ventilation rates (indoors/outdoors), 6) volume of indoor space, 7) filtration, 8) mask use and  
32      effectiveness, 9) distance between people, 10) group size, 11) current infection rates by variant,  
33      12) prevalence of infection and immunity in the community, 13) vaccination rates of the

34      NOTE: This preprint reports new research that has not been certified by peer review and should not be used to guide clinical practice.  
community, and 14) implementation of COVID-19 testing procedures. Demonstration of

35 CEAT, from published studies of COVID-19 transmission events, shows the model accurately  
36 predicts transmission. We also show how health and safety professionals at NASA Ames  
37 Research Center used CEAT to manage potential risks posed by SARS-CoV-2 exposures.

38

39

40 **Keywords:** COVID-19, SARS-CoV-2, aerosol model, COVID-19 Exposure Assessment,  
41 CEAT, Wells-Riley

42

## 43 **Introduction**

44 The novel severe acute respiratory syndrome coronavirus 2 (SARS-CoV-2) that causes the  
45 coronavirus disease 2019 (COVID-19) has quickly spread around the world and was formally  
46 recognized as a pandemic by the World Health Organization (WHO) on March 11, 2020  
47 (WHO, 2021 March 11). COVID-19 poses a great public health, clinical, economical, and  
48 societal burden worldwide. SARS-CoV-2 transmission occurs mainly through close contact  
49 (WHO, 2021 March 11), by direct and indirect contact (via fomites), and through the air via  
50 respiratory droplets and/or airborne particles (i.e. aerosols) (Jayaweera et al. 2020).

51 The global and local transmission dynamics drove an urgent need for assessing potential  
52 risk of transmission while performing different activities in various facilities. Public health  
53 officials have had to reevaluate how the public should interact to reduce and contain viral  
54 spread (Bargain and Aminjonov 2020; Keskinocak et al. 2020; Deckert et al. 2021; Heydari et  
55 al. 2021), leading to assessment of worker and group risks associated with viral exposure in  
56 various settings (Din et al. 2020; Mutambudzi et al. 2020; Sun et al. 2020; Wells et al. 2021).  
57 Risk assessment and planning regularly consider the contribution of an array of factors, using  
58 largely qualitative guidance from public health and media sources (Feyman et al. 2020;  
59 Keskinocak et al. 2020; Wells et al. 2021), such as the viral exposure pathways, risk of infection  
60 (e.g. number of cases per population), efficacy of interventions and personal protective  
61 equipment (PPE; e.g. masks, gloves), human behavior (e.g. adhering to public health  
62 guidelines, hand washing, social distancing), and environmental factors (e.g. ventilation).  
63 Given the numerous factors that affect exposure to the virus, qualitative assessments are  
64 insufficient when trying to compare various courses of action or potential mitigation options.

65 The WHO and the Centers for Disease Control and Prevention (CDC) have released  
66 guidance for risk assessment and management of exposure in the context of COVID-19 at work  
67 (CDC, 2021 August 24), towards health-care personnel (CDC, 2021 September 10),

68 community-related (CDC, 2021 March 1 2022), and associated with domestic and international  
69 travel (CDC, 2021 July 2). However, the qualitative nature of these guidelines makes it difficult  
70 to quantify the exposure risk in varied settings.

71 Researchers have developed tools that predict the risk of transmission from exposure  
72 through inhalation of emitted SARS-CoV-2-containing aerosols. Risk assessment tools provide  
73 an important means of gaining understanding of dynamics of transmission and evaluating and  
74 comparing risks associated with local environmental conditions, community epidemiological  
75 factors, and mitigation options. Typically, the infectious disease risk assessment tools utilize  
76 either a deterministic dose-response approach or, alternatively, a Wells-Riley approach (Sze  
77 To and Chao 2010). A detailed comparison of dose-response models and Wells-Riley models  
78 applied to infectious disease risk assessment is provided in Sze and Chao, 2010, addressing  
79 both models' advantages and limitations. Specific to SARS-CoV-2, Miller et al. (2021) (Miller  
80 et al. 2021) offers a Wells-Riley-based method to model transmission and has developed a  
81 companion COVID-19 Aerosol Transmission Estimator spreadsheet-based tool (CIRES 2020).  
82 The Wells-Riley-based method addresses physical factors that contribute to indoor  
83 transmission, applying a uniform well-mixed box (WMB) assumption and transmission  
84 estimates using the Wells-Riley equation. Bazant and Bush, 2021 (Bazant and Bush 2021)  
85 provide a comprehensive physical model of the factors that affect indoor transmission and  
86 released a spreadsheet-based tool and online app (Khan et al. 2021) that calculates safety  
87 guidelines to limit the viral transmission based upon Wells-Riley and WMB assumptions. This  
88 tool recommends the total number of hours of exposure that are permissible given the number  
89 of people, their behavior, characteristics of the room and its ventilation, and the prevalence of  
90 COVID-19 and variants in the community. Parhizkar, et al., 2021 (Parhizkar et al. 2021)  
91 developed a dose-response approach and model that uses a WMB assumption and a novel  
92 treatment of the inhaled and deposited doses. They demonstrate the model's capability against  
93 well-documented COVID-19 outbreaks and offer a demo version of an online tool (Safe Air  
94 Spaces 2022). Wagner, et al., 2021 (Wagner et al. 2021) offer a comprehensive modeling study  
95 that examines both indoor and outdoor exposures from two-person interactions, examining near  
96 field and far field effects, and modeling the behavior of particulates of various sizes. Other  
97 modeling efforts have focused on predicting transmission risks using epidemiological and  
98 behavioral factors and population statistics (Chande, Lee, et al. 2020; Chande, Gussler, et al.  
99 2020; Harvard IQSS 2020), without addressing facility- and event-specific physical  
100 mechanisms that would affect transmission risk.

101 Rigorous study of the physics of aerosol behavior in indoor spaces have also been  
102 accomplished using both experiments and computational fluid dynamic (CFD) numerical  
103 simulations. These studies analyzed key aspects of the hydrodynamics produced by expiratory  
104 events, including sneezing, coughing, talking, singing and breathing, and the dispersion  
105 processes of the resulting aerosol cloud (Fabregat, Gisbert, Vernet, Dutta, et al. 2021; Fabregat,  
106 Gisbert, Vernet, Ferré, et al. 2021; Li et al. 2022). While these experiments and modeling  
107 studies produce important understanding of the aerosol behavior in the environment and the  
108 respiratory system, their results are specific to the defined scenarios that were modeled and are  
109 too computationally intensive to be used directly and routinely by non-experts.

110 Our goal was to develop a simple-to-use, quantitative exposure and risk assessment tool  
111 that addresses the factors summarized **Fig. 1** and was based on principles of epidemiological,  
112 physics and engineering to provide benefit to risk assessors and decision makers in a variety  
113 of settings. Additionally, we wanted to incorporate recent findings regarding disease  
114 characteristics and virus dynamics Our focus was to create a tool that could be easily used by  
115 people who are tasked with making recommendations or decisions for their organizations or  
116 groups (e.g., businesses, schools, and civic groups) on approaches to reduce viral exposure.  
117 The end result of our project has been the development of the COVID-19 Exposure Assessment  
118 Tool (CEAT). The CEAT model is embedded in an Adobe® PDF (Portable Document Format)  
119 file and was coded in JavaScript using Adobe Acrobat's ® "Prepare a Form" function. The  
120 model's user interface is shown in **Fig. 2A** and is available for download at [https://www.cov-](https://www.cov-irt.org/exposure-assessment-tool/)  
121 [irt.org/exposure-assessment-tool/](https://www.cov-irt.org/exposure-assessment-tool/) as a PDF. The PDF platform was chosen instead of a web  
122 app, since the PDF allows organizations to use the tool within the privacy and security of their  
123 own networks and devices, eliminating any concern that an organization's private worker  
124 safety information was being shared externally. Additionally, the PDF offers the ability to save  
125 and disseminate the results for specific events and scenarios as individual PDF files. The  
126 underlying algorithm used in CEAT leverages aspects of both Wells-Riley models and dose-  
127 response models. An important difference between the CEAT model and the other models  
128 discussed above is that CEAT assesses the additional higher concentration of virus containing  
129 aerosols that may occur when people are in close proximity and applies this approach to groups  
130 between 2 and 250 people, both indoor and outdoors. The model relies on information that the  
131 users would have available or could reasonably estimate, addresses the mechanisms that are  
132 within the organization's control (i.e, distancing, duration, ventilation rates, filtration, mask  
133 wearing, vaccination requirements, and option for indoor/outdoor activities), and  
134 communicates a clear and easily interpretable result. The model attempts to address the full



135 range of exposure risks within a community, from highest exposure risk to people known to be  
136 infected, typical of a clinical environment, to lowest-risk exposure to people who rigorously  
137 follow public health guidance.

## 138 **Results**

### 139 **Model Overview**

140 CEAT allows users to estimate group-wide and individual relative dose, an individual  
141 dose, and transmission risk from potential SARS-CoV-2 exposure in various scenarios, based  
142 on the key mechanistic, viral, and epidemiological factors summarized in **Fig. S1A** and **Table**  
143 **1**. Here we present 1) a brief overview of the CEAT model; 2) the demonstration of the model  
144 applied to real-world, well-documented transmission scenarios; 3) describe how CEAT was  
145 applied operationally by NASA Ames Research Center's Health and Safety office to manage  
146 exposure risk of its staff. Full details of the mathematical model used for CEAT can be found  
147 in the **STARS Methods** section.

148 Exposure is defined as the contact of an agent with an external boundary of a receptor  
149 (exposure surface) for a specific duration (US EPA 2019). Dose is the amount of material that  
150 passes through the boundary based upon the intake rate, concentration and exposure time. In  
151 this case, the boundary is the entrance to the respiratory system (i.e., through the nose, mouth,  
152 and other mucosa) (US EPA 2019) and the intake rate is the inhalation rate. Importantly, rather  
153 than a mass of material, we are only concerned with the quantity of material that contributes to  
154 transmission of disease. For viral dose-response models, the disease causing quantity is often  
155 expressed in plaque forming units (PFU). A Wells-Riley based model expresses dose as an  
156 amount of quanta and when applied in a Poisson probability distribution, the complement of  
157 the Poisson distribution's probability mass function (with the assumption number of  
158 occurrences is zero) can be used to predict an infection rate (Riley et al. 1978, (Sze To and  
159 Chao 2010), (Rudnick and Milton 2003). Engaging in activities with high inhalation and  
160 exhalation rates, such as group exercise, strenuous work tasks or singing (Hamner 2020), is  
161 thought to correlate with higher doses and transmission risks (Jang et al. 2020). Dose is the  
162 appropriate endpoint for a risk model, since it captures the contributions of concentration,  
163 exposure time, and inhalation rate. Since the model is meant to evaluate risks for events that  
164 includes groups of people and the number of people in group is a variable that can be adjusted  
165 when planning events, we use a total group dose ( $D_{Group\ Dose}$ ) as the basis for our model:

$$166 \quad D_{Group\ Dose} = \underline{C} \times \underline{Q}_{Inhalation} \times \Delta t \times Pe_{Total} \text{ (Eq 1)}$$

167 where  $Q_{Inhalation}$  is the average inhalation rate for the group,  $\underline{C}$  is the average concentration  
168 of the agent (in this case, aerosols containing SARS-CoV-2),  $\Delta t$  is the duration of group  
169 exposure, and  $Pe_{Total}$  is the number of people exposed in the group, which we will assume are  
170 all of the people in the group. The  $D_{Group Dose}$  represents the total quantity of infectious  
171 material that enters the respiratory tracts of all of the group by inhalation over the duration of  
172 the potential event.

173 Rather than using an explicit calculation of group dose, the CEAT model takes the form of  
174 a relative dose model, comparing a specific evaluated scenario to a defined high risk baseline  
175 by a ratio:

$$176 \quad \text{Ratio of Doses} = \frac{D_{Evaluated Group Dose}}{D_{Baseline Group Dose}} \quad (\text{Eq 2})$$

177 When the specific scenario results in a value that is equal to the baseline scenario, the ratio is  
178 1. The ratio may be orders of magnitude greater or less than 1 depending on the specific  
179 evaluated scenario. By benchmarking the dose calculations to a baseline scenario that is  
180 considered high risk by Occupational Safety and Health Administration (OSHA), the model's  
181 results can be aligned with the OSHA classifications of exposure risks (US OSHA 2020) (see  
182 **Table S1**). The OSHA risk classifications depend on the industry type, the need for close  
183 contact (i.e. within 6 feet or approximately 2 meters) with people known to be or suspected of  
184 being infected with SARS-CoV-2, or requirement for repeated or extended contact with  
185 persons known to be or suspected of being infected with SARS-CoV-2 (US OSHA 2020). We  
186 define the baseline scenario to represent a person (perhaps a healthcare worker) who is exposed  
187 to a COVID-19 infected person for 15 minutes in an indoor setting with typical ventilation. We  
188 apply a range of assumptions to this scenario, addressing each of the factors in **Table S2** to  
189 arrive at a baseline scenario. This scenario was estimated to be consistent with between 4 and  
190 9 percent likelihood of infection, based upon the range of infection rates reported in various  
191 studies due to close contacts, presumably involving wild type SARS-CoV-2 transmission based  
192 upon the dates of the cases included in the studies in early 2020 (Ng et al. 2021; Qian et al.  
193 2021). The inhalation dose values for other scenarios are compared to the baseline value  
194 through the simple ratio.

195 A critical variable that must be estimated by the model is the concentration of virus-  
196 containing aerosols that occurs as a result of the exhalation from people in the group at the  
197 event. The underlying concentration model used in CEAT assesses both the contributions of  
198 concentration due to the proximity of people (i.e., people in the "near field" whether indoors

199 or outdoors) and the build up of concentration in a room over time (i.e., “far field”) after Nicas,  
200 2009 (Nicas 2009a). As presented in the **STARS Methods**, to determine the near field  
201 concentration, we employ a method that captures the effect of turbulent mixing that occurs due  
202 to higher air changes through ventilation or increased mixing of the air (e.g., through the HVAC  
203 system recirculating the air). Specifically, we employ equations that use the air change rate and  
204 total volume for an indoor space to calculate an eddy diffusivity based on relationships  
205 previously proposed (Cheng et al. 2011; Foat et al. 2020; Venkatram and Weil 2021). We apply  
206 the calculated eddy diffusivity in a novel way that still allows us the advantage of using the  
207 computationally-simple near- and far-field approach. Outdoors, only the near field  
208 concentration contributions are used, since the far field is considered to be negligible (Nicas  
209 2014). Furthermore, also presented in detail in the **STARS Methods**, the CEAT concentration  
210 algorithm uses an approach for extending the near- and far-field approach to groups of people  
211 at set distancing intervals through the application of the superposition principle (Illingworth  
212 1991). The superposition principle has been applied in the modeling of outdoor air pollutants  
213 from multiple sources (Stockie 2011) and to indoor air quality modeling of gaseous pollutants  
214 (Cheng et al. 2011).

215 An important driver of the dose calculation is a stochastic approach that estimates the  
216 expected value of the number of infections in the group, since this is correlated to the quantity  
217 of virus-containing aerosols emitted in the modeled scenarios. In the baseline scenario, we  
218 assumed there to be one infected person. For the evaluated scenario, the number of infections  
219 in the group is dependent on the user's estimate of the group's behavior characteristics and an  
220 estimate of the number of active cases in the community population, calculated using the  
221 prevalence of diagnosed COVID-19 in the community, an estimate of the duration of  
222 infectiousness, and an estimate of the fraction of cases thought to be undiagnosed. The resulting  
223 number of active infections may be less than or greater than 1.

224 We adjust the calculated dose ratio result by additional factors: 1) concentration of virus-  
225 containing aerosols that occurs as a result of the exhalation from people in close proximity, 2)  
226 number of infections in the group, 3) current community prevalence of variants, 4) relative  
227 infectiousness of the prevalent variants; 5) current prevalence of immunity in the community  
228 of group gained by recovery or vaccination, 6) efficacy of immunity in preventing transmission,  
229 and 7) efficacy of surveillance testing of the group. The full CEAT dose ratio equation (**Eq. 3**)  
230 is shown in **Fig. 1B**, along with a mapping of where each of the CEAT step's inputs are applied  
231 in the equation. The expanded version of the CEAT dose ratio equation, showing the NF and  
232 FF terms is found in Equation S46.

233 Users can use the tool to assess two side-by-side scenarios, and results are shown for the  
234 worst case individual dose ratio, total group dose ratio, and near- and far-field contributions to  
235 the total group dose ratio. In the CEAT tool user interface, we refer to this dose as an  
236 “exposure” rather than a “dose,” since exposure is a more recognized term and will not be  
237 misconstrued by a user to have any association with a vaccine dose or medication dose. The  
238 group dose ratios for both scenarios are then categorized into four exposure risk bins, ranging  
239 from “Lower Exposure” through “Very High Exposure” and presented graphically (**Fig. 1A**).  
240 The model’s results include:

- 241 ● **Group-wide Exposure (Dose) Ratio (Fig. 1B, Eq. 3):** Ratio of the group-wide dose  
242 to the baseline group-wide dose. This result is also shown in the bar graph. This result  
243 takes into account the dose that group members are exposed to, as well as the size of  
244 the group. Accordingly, this group-wise result provides an evaluation of the overall  
245 risk of the event.
- 246 ● **Far-Field Group-wide Exposure (Dose) Ratio:** Portion of the group-wide dose that  
247 is due to the well-mixed concentration in the room.
- 248 ● **Near-Field Group-wide Exposure (Dose) Ratio:** Portion of the group-wide dose that  
249 is due to the localized concentration in the room due to the proximity of people.
- 250 ● **Individual Exposure (Dose) Ratio (Fig. 1B, Eq. 4):** This is the ratio of the individual-  
251 dose to the baseline individual dose.
- 252 ● **Individual Dose (Fig. 1B, Eq. 5):** An estimate of the highest-exposed person’s dose in  
253 units of quanta.
- 254 ● **Infection Rate (%):** To determine the infection rate, the Individual Dose is applied to  
255 a Poisson distribution to calculate the probability that the exposed group will become  
256 infected. The estimated rate of infection within the group can be inferred from this  
257 probability. The relationship between the dose and the infection rate can be adjusted  
258 through using a variable in the model called the “Poisson Distribution Adjustment  
259 Factor” in Step 10, which provides a linear adjustment factor to that relationship. The  
260 dose is multiplied by 1 over the adjustment factor.
- 261 ● **# of Index Infectors:** Provides the assumed number of the infected individuals that  
262 were present based upon the selections and inputs in Step 1, Step 2, and Step 10 in the  
263 model. The model used this value to estimate the initial source(s) of infection in the  
264 room or at the event. This value can be a less than one person or fraction of a person,  
265 since it represents a probabilistically-determined number of people  
266

## 267 **Demonstration of the Model Applied to Documented Transmission Events**

268 We have demonstrated the effectiveness of CEAT results to predict infection rates for  
269 known transmission events by assembling data from eleven transmission events that were  
270 documented in the literature (listed in **Table 2**). All of the events except for one, occurred  
271 before the vaccines were available and before the emergence of SAR-CoV-2 variants. To  
272 evaluate each of these scenarios in CEAT, we collected the data needed for each step and set  
273 the average daily cases per 100,000, such that the “Number of people initially infected” in the  
274 results would be equal to one, assuming there was one index case in each scenario. There are  
275 two ways of conceptualizing how the CEAT model is addressing this scenario of a known  
276 infected person (or index case), which are both mathematically equivalent:

- 277 1. A receptor at the center and all others are potential sources. The emissions may occur  
278 from any one of the sources. We calculate an expected value of the dose for the person  
279 at the center, assuming that all of the people are equally likely to be the emitter, with a  
280 probability of  $\varphi$ , where  $\varphi = 1/(\text{Number of People}-1)$  and the one emitter has a quanta  
281 based emission rate of  $\dot{M}$ . CEAT sums the results from all people (both FF and NF),  $s$   
282 and multiplies by  $\varphi$ . This is the expected value of dose that the person located at the  
283 center of the group would receive if there was one emitter in the room, given that the  
284 emitter could have been anywhere in the room.
- 285 2. The source is at the center and all of the people are receptors. We calculate the expected  
286 value of the dose for each receptor (i.e., each susceptible person) given an emitter at the  
287 center, emitting at  $\dot{M}$ . CEAT sums the results from all people (both FF and NF) and  
288 then divides by the number of receptors (i.e., number of people - 1) to arrive at an  
289 average. The result is the expected value of the mean dose that all people would receive  
290 in the room from the one emitter.

291 When examining CEAT performance for transmission events, we use the event’s number  
292 of infections, and the infection rate,  $P$ , which is the number of secondary cases (total infected)  
293 divided by the total susceptible people, yielding,  $P = \frac{\text{Total Infected}}{\text{Total Susceptible}}$ . The total  
294 number of total susceptible is equal to the total people minus the index cases (typically equal  
295 to one). Using the information describing the event’s duration, room size, ventilation rate,  
296 activity type and any information on the location or the spacing of the people (**Table 2**), the  
297 CEAT individual dose is calculated. The infection rate can be predicted using the same  
298 statistical approaches that are used in the Wells-Riley model (Riley et al. 1978), in which the

299 probability of at least one infection is computed using an assumed Poisson distribution, with  
300 shape parameter equal to  $D_{CEAT i}$ , as shown in **Eq. 7**:

$$301 \quad P_{CEAT Prediction} = 1 - \exp(-D_{CEAT i}) \quad (\text{Eq 7})$$

302 The CEAT predicted infection rate is plotted against the observed cases among the  
303 susceptible people (**Fig. 2A**). Information on vaccination, variant, and mask usage (which was  
304 none) was gathered from the reported events (**Table 2**). The CEAT results show a high  
305 correlation with the observed with an almost 1-to-1 (i.e.  $R^2 = 0.94$ ) relationship to the observed  
306 infection rates (**Fig. 2A**). In addition, CEAT correctly binned the events as high risk and there  
307 is a significant positive correlation between the number of observed infections and CEAT  
308 group-wise dose ratio (**Fig. 2E**). As discussed in the previous section, to assess infection rate,  
309 the initial relationship between the dose and the infection rate is unadjusted and then through  
310 the “Poisson Distribution Adjustment Factor” in step 10 we achieve the corrected adjustment.  
311 With CEAT, even before this adjustment takes place, we still observe a strong correlation to  
312 the observed infection rates (**Fig. 2B**).

313 As a comparison to the CEAT results, the traditional Wells-Riley result that assumes a well-  
314 mixed dose,  $\underline{D}_{WMB}$ , is calculated using:

$$315 \quad P_{Wells Riley Prediction} = 1 - \exp(-D_{WMB}) \quad (\text{Eq 8})$$

316 Using the same assumptions applied to the CEAT model for each of the events, including the  
317 same quanta based emission rate, the Wells-Riley predicted infection rates for both the adjusted  
318 (**Fig. 2C**) and unadjusted (**Fig. 2D**), clearly show poor predictions when compared to the  
319 observed infection rates. The CEAT approach clearly outperforms the Wells-Riley in  
320 predicting infection rate in these cases (**Fig. 2E**). Interestingly, we also observe that the CEAT  
321 outperforms the Wells-Riley model with several other important parameters which include:  
322 distancing, density, breathing rate, and volume of the room (**Fig. 2E**).

### 323 **CEAT use to determine risk assessment for social gatherings**

324 To demonstrate how CEAT can estimate potential exposure risk to COVID-19 for  
325 gatherings and events, we used CEAT to assess a set of hypothetical gathering scenarios that  
326 could have occurred in three locations in the United States (**Fig. 3**) using published CDC county-  
327 level COVID-19 7-day average new case data for the locations on 31 January 2022 (CDC  
328 2020a). We chose three representative locations: 1) a county with a low vaccination rate and



329 high 7-day average new case rate (Knox County, TN), 2) a county with a moderate vaccination  
330 rate and a 7-day average case equivalent to the national average (Suffolk County, MA), 3) a  
331 county with the high vaccination rate and a low daily cases (Montgomery Country, MD). At  
332 the time of analysis for all counties the Omicron variant accounted for >99% of COVID-19  
333 cases (CDC 2022). We assumed the gatherings lasted 5 hours and would be held both indoors  
334 or outdoors. We also included a range of scenarios for distancing, type of masks being used,  
335 composition for the group of people, and location (i.e. indoors or outdoors). Lastly, we included  
336 analysis for 3 different group characteristic scenarios for the gatherings: 1) the general public  
337 (i.e. “equal to the community average”); 2) groups of people that are 100% vaccinated and  
338 follow all public guidelines; and 3) groups of people that are 100% vaccinated, follow all public  
339 guidelines, and testing was required before the gathering.

340 The exposure assessment from this analysis can help guide individuals to safely plan  
341 gatherings and events. As expected in all scenarios, if the gathering is composed of 100%  
342 vaccinated individuals that were tested and follow all public guidelines, the exposure risk is  
343 very low both indoors and outdoors with the best masks and with an increasing number of  
344 people it increases to medium risk (**Fig. 3**). When considering the gathering in a general public  
345 scenario (e.g. eating at a restaurant), for all indoor scenarios in all counties without a mask with  
346 >10 people in the room, the group is at high risk of exposure to SARS-CoV-2 even when spaced  
347 3 meters (approximately 10 feet) apart. Overall we demonstrate with CEAT the more  
348 precautions followed, the greater the reduction of exposure and this scenario can be used as a  
349 guide for the public on how to use CEAT to properly determine the safest way to assemble  
350 while keeping the risk of exposure to COVID-19 low.

351

### 352 **NASA Ames Research Center used CEAT to determine the safest method for** 353 **allowing workers to return to work**

354 CEAT has been used by the NASA Ames Research Center (ARC) safety office to assist  
355 them in planning for workers to return to their campus. Starting on December 11, 2020, NASA  
356 ARC began to use the first beta version of CEAT to assess whether the tool could assist in  
357 gaining understanding on how to keep essential workers safe when having to work in person  
358 on the NASA ARC campus. To demonstrate how NASA ARC safety office has utilized this  
359 tool, we provide their assessment of exposure potential in 73 different scenarios throughout the  
360 campus (**Fig. 4** and **Table S3**). Since NASA ARC has been using this tool throughout the  
361 pandemic, every assessment used the latest COVID-19 case numbers from the State of

362 California (US State of California 2022a). As is shown in **Fig 4**, the case numbers will vary  
363 due to the changing number of cases for that particular date of assessment, so it is essential to  
364 analyze the risk continuously with the most up-to-date COVID-19 case rates.

365 For each scenario, CEAT was used to determine the maximum number of personnel that  
366 could be allowed to be in each location such that the exposure risk was the lowest, while still  
367 allowing the work to be performed (**Fig. 4** and **Table S3**), which during pre-pandemic would  
368 have been occupied by more personnel. These maximum occupancy were included in the  
369 project's Return To Onsite Work (RTOW) plan that was reviewed by the safety office. In  
370 general, most operations could occur with one to two people thus reducing the potential  
371 exposure and resulting in a lower exposure risk. However, some operations required up to 10  
372 personnel to be fully functional. As expected, these conditions increased the COVID-19  
373 exposure risk to medium level. NASA ARC considered the group of people at work to be  
374 composed of people following all public health guidance which had the effect of reducing the  
375 assumed probability of COVID-19 prevalence in the group below the average for the  
376 community, with exception of a few locations where employees from organizations outside  
377 NASA ARC would participate. Social distancing was assumed to be the maximum possible for  
378 that work to be performed. For some locations such as "Critical activities when spacecraft  
379 arrives and extra hands needed - Location C" social distancing could not be achieved while  
380 performing the work, so other factors were considered, such as limiting the project duration, to  
381 find the lowest risk exposure estimate possible for that location and operation.

382 The breathing rate and vocalization for each location were also part of the decision in  
383 determining the maximum number of people in each location. Of all the locations and  
384 operations analyzed, only one location/operation resulted in the worst case scenario which  
385 produced the highest risk exposure assessment (i.e. "High-Medium Risk Exposure"). The  
386 operation "Material testing such as compression testing and fatigue testing" typically involved  
387 high exertion physical activities as well as heavy exertion for the breathing rate and speaking  
388 over a long duration. The majority of the other locations and operations only require passive  
389 breathing rate and standing/speaking. The various operations that required elevated breathing  
390 rate and vocalization to light exertion typically had shorter project durations in order to reduce  
391 the COVID-19 exposure risk.

392 To provide inputs for the Air Changes per Hour (ACH), the ventilation rates for each  
393 location were either provided by the building managers, were directly measured, or were  
394 assumed using the guidelines in Step 8 in the CEAT. The most accurate ventilation rates  
395 available to the safety office were used in the model for each scenario. With the available data

396 and estimated parameters in some cases, CEAT allowed NASA ARC to determine the  
397 operation-specific mitigation approaches, allowing its essential workers to return to work in-  
398 person with the low exposure risk to COVID-19.

399 CEAT has also been effective in allocating project resources and PPE where they would be  
400 most beneficial. When reviewing RTOW plans, NASA ARC safety office used the CEAT as a  
401 resource to recommend whether limited KN95/N95 masks would be effective at reducing  
402 potential exposure risk. Similarly, projects used CEAT when purchasing portable air cleaners  
403 (PACs), calculating the number of ACH needed to reduce risk to acceptable levels, typically  
404 “Lower Exposure”. Multiple projects found the number of PACs needed to reduce risk to  
405 acceptable levels were not financially feasible, and other controls such as increasing mask  
406 effectiveness and/or working in a different location were more cost effective for the same risk  
407 reduction. This allowed projects to spend their budgets more efficiently.

408 When the workplace face mask policy became optional for vaccinated personnel, CEAT  
409 was used to identify potential locations and operations where face masks would be required  
410 regardless of vaccination status. Locations and/or operations where the relative exposure risk  
411 was in the “Medium” or “High” category were required to wear face coverings regardless of  
412 vaccination status. CEAT was especially effective in this regard as it allowed the safety office  
413 to provide this guidance using a consistent and unbiased method.

414 When tracking the CEAT model results over time, one can examine how the model  
415 responds to changes in community conditions and changes in organizational policies. NASA  
416 ARC tracked their worksite-specific relative group-wide exposure ratios with the California  
417 seven-day case rate (**Fig. 5**). There was a strong correlation (correlation coefficient=0.9759)  
418 between the two results, as would be expected, since the seven-day case rate is an input into  
419 the CEAT model in Step 10 (**Fig. 1B, Eq. 3**). Specifically, NASA ARC used the location- and  
420 operation-specific exposure risk ratios that were assessed on a biweekly basis to calculate a  
421 “Centerwide Accepted Median Exposure Risk Ratio”. The fact that the CEAT results moved  
422 up and down with the community conditions allowed the NASA ARC safety office to adjust  
423 its guidance and mitigation strategies accordingly.

424 Beginning May 14, 2021, NASA ARC implemented the updated CEAT that included  
425 variant prevalence. It was noted that the correlation between the “Centerwide Accepted Median  
426 Exposure Risk Ratio” and the California case rate immediately decreased. However, at the  
427 same time this updated CEAT iteration was implemented, the NASA ARC face mask policy  
428 became optional for vaccinated personnel. Once NASA ARC reinstated their face mask policy  
429 for all individuals regardless of vaccination status, the correlation between “Centerwide

430 Accepted Median Exposure Risk Ratio” and the California case rate appeared to return to  
431 similar values before May 14, 2021.

## 432 **Discussion**

433 By establishing a set of equations that included mechanistic factors affecting nearfield and  
434 far field concentration, filtration, group behavior, and SARS-CoV-2 infection and immunity  
435 prevalence in the community, we developed a flexible, simple-to-use COVID-19 Exposure  
436 Assessment Tool. The tool achieved our goal of allowing businesses, schools, government  
437 agencies, and individuals to assess COVID-19 exposure to the risk for groups and  
438 organizations. The tool is easy to use, computationally fast, and built on a well-developed and  
439 documented mathematical model that includes aerosol behavior, knowledge of SARS-CoV-2  
440 transmission dynamics, as well as the effect of proximity. Here, though our comparison of  
441 CEAT results against observed transmissions for documented events, we demonstrate that  
442 CEAT can provide the accurate predictions compared to known cases with observed infection  
443 rates (**Fig. 2**), an example of how CEAT can be used for gatherings (**Fig. 3**), and real-time  
444 usage of this tool demonstrating how NASA ARC safety office has been over the past year  
445 (since the tool’s original release in December 2020) evaluating how to allow essential  
446 employees to work in person with the lowest possible risk to COVID-19 exposure (**Fig. 4**).

447 As the CDC notes, the inhalation of fine respiratory droplets and aerosol particles is the  
448 principal means of SARS-CoV-2 transmission (CDC 2020b). This is in line with recent  
449 publications that have shown that SARS-CoV-2 is spread by airborne transmission through the  
450 aerosols produced from breathing, talking, and singing (Chen et al. 2021; Miller et al. 2021;  
451 Adenaiye et al.; Coleman et al.). Given this, the CEAT’s mathematical model addresses the  
452 aerosol dynamics and transport, treating the suspended aerosols as if they are dispersed as  
453 gasses would be using an eddy diffusivity approach, but also addressing deposition as a sink,  
454 using the same approach for aerosol deposition that was presented in the COVID-19 Aerosol  
455 Transmission Estimator spreadsheet-based tool (CIRES 2020), where an aerosol deposition  
456 factor of  $0.24 \text{ hr}^{-1}$  was used.

457 To demonstrate the model, we examined eleven literature-documented events with one of  
458 the events occurring in 11/2021 with known the Omicron variant and vaccine data (NIPH 2021)  
459 (**Fig. 2** and **Table 2**). When comparing CEAT results to the Wells-Riley model, CEAT better  
460 predicted the infection rate compared to the observed infection rates reported (**Fig. 2**). In  
461 addition, the exposure scores for all events predicted a high risk of exposures, which correlates  
462 to what was reported for each of these cases.

463 Schools and universities that have opened to in-person classes have been able to maintain  
464 low to no COVID-19 cases by applying many of the mitigation methods that are included in  
465 the CEAT, albeit independent of CEAT. The scenarios included in our assessment of gatherings  
466 (**Fig. 3**) can be applied to such environments and seems to match the observations that are being  
467 reported by schools and universities. Known outbreaks or superspreader events related to  
468 school openings have been chiefly reported occurring outside the classroom environment,  
469 including events during spring breaks (Doyle et al. 2021) or athletic-related events (Teran et  
470 al. 2020), where enforcement of specific guidelines to reduce spread were not implemented.  
471 Other COVID-19 models for school re-openings have also shown similar recommendations as  
472 CEAT (Brooks-Pollock et al. 2021; Hernández-Hernández and Huerta-Quintanilla 2021;  
473 Phillips et al. 2021). Brooks-Pollock et al. (Brooks-Pollock et al. 2021) provided a stochastic  
474 transmission model based on social contact data and patterns of student mixing to determine  
475 the impact and risk of COVID-19 transmission for universities in the United Kingdom. Since  
476 their model only targets social patterns and behavior of students contributing to COVID-19  
477 infections, the focus for their mitigation strategies was with reducing the number of students in  
478 in-person classroom settings (i.e. increase social distancing), reducing living circles for  
479 students, and included regular testing. Although their model only takes into account one  
480 parameter from our model, the social distancing measures are in agreement with the exposure  
481 risk assessment results from our CEAT analysis. There also have been two independent agent-  
482 based models developed to assess SARS-CoV-2 transmission (Phillips et al. 2021) and  
483 COVID-19 cases (Hernández-Hernández and Huerta-Quintanilla 2021). Similar to the model  
484 described above, Phillips et al. (Phillips et al. 2021) agent-based model focuses on SARS-CoV-  
485 2 transmission based on children's household sizes in the Ontario child care centers and school  
486 buildings. They have also included parameters to take into account classroom sizes, sibling  
487 influence, symptomatic and asymptomatic rates, and physical distancing. Hernández-  
488 Hernández et al. (Hernández-Hernández and Huerta-Quintanilla 2021) presented an agent-  
489 based model that utilizes the students' community network to predict spread of COVID-19  
490 within a school setting. They also considered the following parameters: 1) status of COVID-  
491 19; 2) physical distancing; 3) viral load; 4) hygiene standards; 5) confined spaces; and 6) social  
492 interactions. As expected, both models demonstrated the importance of social distancing and  
493 following the proper guidelines to prevent spread of COVID-19 which is in agreement with  
494 our model.

495 The recently published model by Miller et al. (Miller et al. 2022) utilizes CDC's  
496 COVIDTracer Advanced tool to provide a transmission model for SARS-CoV-2 in schools.



497 They took into account scenarios for infection in the community and public compliance to CDC  
498 guidelines to mitigate COVID-19 spread. Similar to other models, they found that social  
499 distancing is key to reduce spread and that the COVID-19 community case rate is crucial when  
500 assessing exposure risk. Other models of COVID-19 spread in small colleges only consider  
501 similar parameters as the models described above (Bahl et al. 2021). Although all these models  
502 provide a good basis for predicting the optimal conditions for having in-person classes, they  
503 miss key parameters incorporated in CEAT that are important to determine the most effective  
504 and accurate assessment of exposure risk to COVID-19. The lessons learned from classroom  
505 scenarios can also be applied to other gatherings, such as family gatherings. We demonstrated  
506 that depending on the location and people's behavior, there are scenarios which have low risk  
507 for viral exposure (**Fig. 3**). Currently, there are no models specifically focused on family  
508 gatherings, but the literature available confirms the risk assessment analysis that CEAT  
509 generates. Whaley et al. (Whaley et al. 2021) reported an assessment of COVID-19 risk  
510 associated with social gatherings, specifically during birthdays. They utilized data from 2.9  
511 million households from a large insurance database that included COVID-19 prevalence from  
512 January 1 to November 8, 2020, and household birthdays across geographical regions in the  
513 US. They estimated that increased cases of COVID-19 correlated with social gatherings (i.e.  
514 birthdays), with increased cases for households in counties with higher COVID-19 prevalence.  
515 This study can serve as a population confirmation for the assessment we provided for  
516 gatherings with CEAT (**Fig. 3**).

517 Since the beta version release of CEAT in December 2020, we have made several additions  
518 to the tool to improve it including: 1) an eddy diffusivity-based near-field concentration  
519 algorithm; 2) added an infection rate calculation, 3) accounted for new SARS-CoV-2 variants,  
520 3) address COVID-19 surveillance testing for groups, 4) addressed immunity within the  
521 population gained from recovery or vaccination. These additional functionalities were added  
522 to adapt to new information that was available since the initial release and reflect the team's  
523 increased understanding of the risk dynamics related to SARS-CoV-2 transmission.

524 To determine the capability of CEAT being used by an organization to safely regulate  
525 employees working in-person, we have provided an example of it being applied by the NASA  
526 ARC safety office (**Fig. 4** and **Table S3**). NASA ARC adjusted parameters related to group  
527 size, duration of time, and ventilation for the project to bring the exposure level to the lowest  
528 possible risk. The analysis shows how NASA ARC continued to monitor the changing case  
529 numbers within the community and utilized CEAT to provide the safest possible scenario for  
530 essential employees to work in-person. The use of CEAT by NASA ARC represents a blueprint



531 for other organizations, businesses, and schools to use the tool to manage their organizations  
532 exposure and risks to allow the organization to optimize mitigation strategies for employees to  
533 work in-person with lower exposure risk to COVID-19. The case study at NASA ARC has  
534 shown that as the push for employer vaccine mandates increases (The White House 2021),  
535 employers can calculate the potential exposure risk reduction among their workforce compared  
536 to the community. This will be especially useful for workplaces in communities with low  
537 vaccination rates, where an employer vaccine mandate could have a large reduction in risk.

538 There are certain parameters in CEAT's model that will have a greater influence on the  
539 assessment for exposure risk to COVID-19. As the examples we have provided show, the  
540 location of the gathering makes a big impact on the outcome (i.e. indoors vs outdoors) (**Figs. 3**  
541 **and 4**). This is due to the fact that the exchange of aerosols between people outdoors will  
542 obviously be greatly reduced due to open circulation of the air versus in a confined space. The  
543 compliance to public health guidance policies is another parameter that will greatly change the  
544 outcome of the exposure risk assessment (**Figs. 3 and 4**). Lastly, the type of mask will make a  
545 considerable difference on the outcome of the model. From existing literature on effectiveness  
546 of masks (Brooks and Butler 2021; Howard et al. 2021; Wang et al. 2021), our model takes  
547 into account that the better the mask and the greater the adherence to mask wearing results in  
548 a reduction of dose ratio. (**Figs. 3 and 4**).

549 We believe that this tool and model can be easily modified and applied for guidance in  
550 current and future epidemics/pandemics from respiratory pathogens. In addition to SARS-  
551 CoV-2, a systematic review of the literature has shown that measles, TB, chickenpox,  
552 influenza, smallpox and SARS have strong and sufficient evidence of an association between  
553 their transmission and ventilation and air movement (Li et al. 2007). Accordingly, if pathogens  
554 have similar transmission mechanisms through aerosols, CEAT model can be modified to  
555 include the aerosol and viral dynamics to accommodate their pathogen-specific exposure risk  
556 assessment. We believe that by providing CEAT to the general public and building on its  
557 capabilities, will have a long lasting beneficial impact for both our current pandemic and many  
558 other scenarios.

559

## 560 **Limitations of the Study**

561 As with any mathematical model, there will be parameters that cannot be fully captured.  
562 Our model has a number of inherent limitations; nonetheless, it has been demonstrated to be  
563 used to accurately predict COVID-19 exposure risk for a limited number of eleven documented

564 transmission event cases. In some of these cases key parameters were not available but were  
565 instead estimated. A full validation of the model where a separate complete training set and  
566 test data set were compiled and applied to the model validation.

567 Several simplifying assumptions were made in the development of CEAT that resulted in  
568 more conservative results. One conservative assumption was using the highest exposed person  
569 to represent all people in a group. In future versions of CEAT, we may calculate location  
570 specific exposure values that account for the location of each person in the space, versus every  
571 other person in the space. This approach would result in a lower group exposure estimate than  
572 we currently calculate.

573 The CEAT concentration model assumes exhalations behave isotropically (i.e., they  
574 disperse equally in all directions), are non-buoyant, and are continuous exhalations. In reality,  
575 exhalations are more complex and may range from violent expiratory events or more regular  
576 puffs (Bazant and Bush 2021). Exhalation plumes are typically anisotropic jets and have a  
577 buoyant nature due to their relative warmth and higher humidity. CFD modeling has captured  
578 these dynamics (Fabregat, Gisbert, Vernet, Ferré, et al. 2021; Fabregat, Gisbert, Vernet, Ferré,  
579 et al. 2021; Li et al. 2022). To compensate for the fact that CEAT assumes plumes are non-  
580 buoyant, which likely results in CEAT over-predicting concentrations at breathing heights, we  
581 adjust the height of the near-field volume to be equal to the distance between the source and  
582 the receptor, mixing the emission in all directions and in a larger near-field volume. The  
583 anisotropy is more difficult to capture in a model, given that people in groups may be facing in  
584 different directions at any point in time and in some events, such as a classroom, people may  
585 have a more uniform directionality. Additionally, the direction of the airflow in an indoor space  
586 is dependent on the flowrate characteristics of the ventilation system, geometry of the space,  
587 geometry and type of air vents, doors, windows, differential heating and cooling, other fans in  
588 the building, movement of people, and indoor/outdoor environment interactions. The simple  
589 approach used by CEAT to arrive at a concentration, certainly could be improved upon for any  
590 specific situations using CFD modeling, however the computational complexity and run times  
591 would greatly increase. Experiments that included high temporal and spatial measurement of  
592 CO<sub>2</sub> from people in a variety of indoor conditions may be useful for testing and optimizing the  
593 concentration modeling approach used in CEAT. Experimentation, similar to the studies  
594 conducted by Vernez et al. 2021 (Vernez et al. 2021), but using exhaled CO<sub>2</sub> and inert aerosols  
595 as tracers, could be accomplished to compare with results obtained using CEAT's algorithms  
596 to validate its concentration models and possibly calculate adjustments for the eddy diffusivity.

597 The aerosol deposition and virus decay behavior are simplistically handled in CEAT by  
598 adding additional terms to the air change rate resulting in a lower concentration since the  
599 effective ACH is increased. CEAT uses the same values for aerosol deposition and virus decay  
600 of  $0.24 \text{ hr}^{-1}$  and  $0.63 \text{ hr}^{-1}$ , respectively, for all conditions, using the same values recommended  
601 in CIRES, 2020. The deposition and virus decay rates should vary based upon environmental  
602 conditions and the nature of the exhalation conditions (breathing, coughing, sneezing, singing,  
603 and speaking). In future versions of CEAT, exhalation-specific deposition rates and the  
604 environmental-specific decay rates (i.e., varying by humidity, temperature, and ultraviolet  
605 radiation) could be calculated (Biryukov et al. 2020; Ratnesar-Shumate et al. 2020; US DHS  
606 2022).

607 The lack of incorporation of different efficiencies for the different vaccines available. In  
608 our model, we currently have “Protective Effectiveness of Immunity” being considered as one  
609 universal number for the population being assessed. We believe that differences for efficacy  
610 between the vaccines can be averaged for the overall community. Our model also lacks the  
611 ability to incorporate the length of time that has passed since being vaccinated or previously  
612 infected. This might change the risk assessments since we now know that for both cases the  
613 levels of antibodies against SARS-CoV-2 reduce over time (Khoury et al. 2021; Marot et al.  
614 2021; Yamayoshi et al. 2021). However, more research is needed to determine how this impacts  
615 the protection against SARS-CoV-2, which is the reason we have not incorporated this  
616 parameter into our model at the moment. Additionally, CEAT does not account for the buildup  
617 of viral particles between groups utilizing the same space one after another. This limitation will  
618 impact groups gathering in a room separately, but sequentially. One way to overcome this  
619 limitation is for groups to allow a certain amount of time between occupancy. Calculating the  
620 amount of time needed for a ventilation system to remove 99% of contaminants, like that  
621 provided by the CDC for infection control in health-care facilities (CDC 2003), can allow  
622 groups to calculate their exposure risk ratio during separate but successive events. Similarly,  
623 groups can estimate their relative risk of back-to-back gatherings by adding the total duration  
624 of all meetings throughout the day.

625

626 **Acknowledgments:** The opinions expressed in this article are those of the authors and do not  
627 reflect the view of Signature Science LLC, National Institutes of Health, the Department of  
628 Health and Human Services, or the US government. The authors acknowledge and thank  
629 Signature Science’s Mr. Jim Gibson, of Charlottesville Virginia, for the development of certain  
630 graphics for the manuscript and for the website development for the publishing of CEAT.

631 Additionally, the authors acknowledge and thank Mr. Ken Martinez of the Integrated  
632 Bioscience and Built Environment Consortium (IBEC) for his review of the draft manuscript  
633 and his enthusiasm for the CEAT.

634

635 **Funding Acknowledgments:** B.S. and M.I. developed the CEAT concept, method, model,  
636 code and user interface, conducted literature reviews, and prepared this manuscript using solely  
637 Signature Science, LLC provided Internal Research and Development (IR&D) funding. S.D.  
638 was supported by the DOE Office of Science through the National Virtual Biotechnology  
639 Laboratory (NVBL), a consortium of DOE national laboratories focused on response to  
640 COVID-19, with funding provided by the Coronavirus CARES Act. A.B. is supported by  
641 supplemental funds for COVID-19 research from Translational Research Institute for Space  
642 Health through NASA Cooperative Agreement NNX16AO69A (T-0404) and further funding  
643 was provided by KBR, Inc.

644

645 **Author Contributions:** Conceptualization: B.S.; Creation of Model and Tool: B.S. and M.I.;  
646 Methodology: B.S., M.I.; Formal Analysis: A.B., B.S., C.G., N.S.T.; Analysis with NASA  
647 ARC usage: B.F.H., K.D.C., N.B.N, A.R.D., A.B.; Investigation: A.B., B.S., M.I.; Resources:  
648 A.B., B.S.; Writing Original Draft: B.S., M.I. A.B., N.S.T.; Writing original draft for NASA  
649 ARC usage: B.F.H., A.R.D.; Review & Editing: A.B., B.S., M.I., C.G., S.D., A.R.D., N.S.T.,  
650 B.F.H., T.A.; Figures and Visualization: B.S., A.B., N.S.T., for graphical abstract: A.B.;  
651 Funding Acquisition: A.B, B.S.; Supervision: A.B., B.S.

652

653 **Declaration of Interests:** The authors declare no competing interests.

654

## 655 **Figure and Table Captions**

656 **Figure 1. COVID-19 Exposure Assessment Tool Interface (CEAT) and background on**  
657 **the model utilized. A)** User interface of the interactive PDF for CEAT. **B)** The equations that  
658 the CEAT model uses to calculate results.

659

660 **Figure 2. Validation of the CEAT with Known COVID-19 Spreading Events. A)** and **B)**  
661 The adjusted and unadjusted scatter plot comparing the observed infection rates of known  
662 events (found in **Table 2**) to CEAT predicted infection rates. **C)** and **D)** The adjusted and

663 unadjusted scatter plot comparing the observed infection rates of known events to Wells-Riley  
664 model predicted infection rates. For **A) - D)** linear fits were made to the data points and the  
665 residuals of these fits are plotted underneath each plot. The  $R^2$  values for the fits are shown in  
666 the plots. **E)** Correlation plot of the observed infection rate to both the CEAT and Wells-Riley  
667 adjusted predicted infection rates. Correlation with additional parameters from the event is  
668 shown. The size of the nodes reflects the degree of correlation (i.e. larger the size the higher  
669 the correlation). Positive correlation is related to the higher shades of red, while negative  
670 correlation is related to higher shades of blue. Statistically significant correlations are denoted  
671 by \*\*\* p-value < 0.001, \*\* p-value < 0.01, and \* p-value < 0.05. **F)** Scatter plot of the exposure  
672 risk for all eleven events determined by CEAT.

673

674 **Figure 3. COVID-19 Exposure Assessment for Gathering Lasting 5 Hours.** Data was  
675 analyzed on January 31st, 2022 for three US counties from the lowest (Montgomery County,  
676 MD) to highest (Knox County, TN) COVID-19 cases. The time was kept constant for all data  
677 points which assumes an average gathering of around 5 hours. The vaccination rates and  
678 population recovered rates are displayed on top of the plot for each county. Different scenarios  
679 were represented for location (outdoors = triangle, indoors = circle), distancing (increasing  
680 point size relates with increasing distance), and mask usage (no masks = red, average masks =  
681 blue, and N95/KN95 = yellow). The background shading of the plot indicates whether the data  
682 points are considered low risk (light blue), medium risk (yellow), or high risk (red) for COVID-  
683 19 exposure.

684

685 **Figure 4. COVID-19 Exposure Assessment for Determining Lowest Exposure Risk for**  
686 **In-Person Work by NASA Ames Research Center.** Exposure risk ratios using CEAT were  
687 calculated for 73 different scenarios (i.e. various locations and operations) at NASA ARC. The  
688 variables used for all ten steps are depicted for each scenario highlighting how various inputs  
689 affect the exposure risk ratios. The data for this figure is available in **Table S3**.

690

691 **Figure 5. NASA Ames Research Center (ARC) Accepted Exposure Risk in Relation to**  
692 **Community Case Rates.** Exposure risk ratios were calculated on a biweekly basis for 76  
693 different scenarios (i.e. various locations and operations) at NASA ARC starting March 1, 2020  
694 upon approval to RTOW through September 1, 2021. Biweekly reassessments included  
695 changes in community conditions such as case rate, variant prevalence, and vaccination rates  
696 in California. The median of all projected exposure risk ratios was calculated on a biweekly

697 basis to establish a “NASA ARC Accepted Median Exposure Risk” (blue). These values were  
698 plotted along with the California state 7-day case rate per 100 thousand (orange). Notations  
699 were made designating major events and/or policy changes that may have influenced trends  
700 and deviations. The background shading of the plot indicates whether the data points are  
701 considered low risk (light blue) or medium risk (yellow) for COVID-19 exposure.

702

703 **Table 1. Summary of Factors.** Mechanistic and epidemiological factors included in the  
704 Nomogram Model that affect exposure and inhalation dose.

705

706 **Table 2. Reported COVID-19 transmission events.**

707

## 708 **Supplemental Figures and Tables**

709 **Figure S1. The different box models for CEAT.** A) Factors Included in COVID-19 Exposure  
710 Assessment Tool Interface (CEAT). A summary of the factors and mechanisms affecting the  
711 comparative dose and exposure risks. B) Single Zone Well-Mixed Box Model. Basic box  
712 model assumes emissions are instantaneously well mixed. C) Near Field (NF) and Far Field  
713 (FF) Box Model. “Box-within-a-box” approach provides localized higher concentration in the  
714 vicinity of the source.

715

716 **Figure S2. CEAT Concentration Model Performance.** A) Modeled results vs. measured  
717 concentrations using CEAT concentration model in cases when ACH was less than or equal to  
718 than  $0.75 \text{ hr}^{-1}$ , applying the relationship between ACH, room size and eddy diffusivity  
719 according to Venkatram and Weil, 2021. Results are normalized by dividing by the emission  
720 rate. B) Modeled results vs. measured concentrations using CEAT concentration model in  
721 cases when ACH was greater than  $0.75 \text{ hr}^{-1}$  and assuming 4 vents per 100 meters<sup>2</sup> of room area,  
722 applying the relationship between ACH, room size and eddy diffusivity according to Foats et  
723 al., 2021. Results are normalized by dividing by the emission rate. C) Modeled results vs.  
724 measured concentrations using CEAT concentration model for all cases.

725

726 **Figure S3. Dimensions and sources for the box model.** A) Near Field (NF) and Far Field  
727 (FF) Box Dimensions with Two People. B) The application of the principle of superposition  
728 with Near Field (NF) and Far Field (FF). C) Near Field (NF) Triangular Prisms for the 1<sup>st</sup> Ring



729 of the Group. NF triangular prisms for the 1<sup>st</sup> ring of the group that have a height and base of  
730  $D_{tot}$ , in a triangular grid with each side length of  $D_{tot}$ . The first ring's triangular prisms have  
731 a base area of  $A1 = \frac{1}{2} D_{tot}^2$ . **D) Near Field (NF) Triangular Prisms for the 2<sup>nd</sup> Ring of the**  
732 **Group.** NF triangular prisms for the 2<sup>nd</sup> ring of the group that is equally spaced  $D_{tot}$ . The second  
733 ring's triangular prisms have areas  $A2 = \frac{1}{2} 2D_{tot}^2$  and  $A2 = \frac{1}{2} \sqrt{3} D_{tot}^2$ . These average to  
734  $A2 = 0.9330 D_{tot}^2$ . **E) Source perspective with two sources shown.** Under an assumption of  
735 isotropy assuming no predominate flow and a sufficient averaging period, the sources emit in  
736 all directions equally. **F) The same two triangles that impact the receptor in the source**  
737 **perspective can be turned 180 degrees and are part of the potential set of triangles in each ring.**  
738 The dimensions and parameters are identical between both views.

739

740 **Table S1. OSHA Risk Classifications.** OSHA's classifications offer a means of comparing  
741 exposures to a scenario that can be defined as high risk (US OSHA 2020).

742

743 **Table S2. Baseline Scenario Approach.** Mechanisms affecting the exposure risk.

744

745 **Table S3. NASA Ames Research Center (ARC) CEAT Data.** Calculated exposure risk ratios  
746 and CEAT assessment variables for different scenarios varied by location and operation at  
747 NASA ARC. The data in this figure is used in **Fig. 4**.

748

749 **Table S4. Comparison of Three Simple Approaches to Modeling a Continuous Point**  
750 **Release.** In each of the three cases, the equations for concentration are nearly identical.

751

752 **Table S5. Triangular Prism Parameters and Equations for Each Ring**

## 753 **STAR★Methods**

### 754 **RESOURCE AVAILABILITY**

#### 755 *Lead Contacts*

756 Further information and requests for resources and reagents should be directed to and will  
757 be fulfilled by the Lead Contacts, Afshin Beheshti ([afshin.beheshti@nasa.gov](mailto:afshin.beheshti@nasa.gov)) and Brian  
758 Schimmoller ([bschimmoller@signaturescience.com](mailto:bschimmoller@signaturescience.com)).

759

#### 760 *Materials Availability*

761 This study did not generate new unique reagents.

762

### 763 ***Data and Code Availability***

764 The published article includes all datasets generated and analyzed during this study. Any  
765 additional information required to reanalyze the data reported in this paper is available from  
766 the lead contact upon request.

767

## 768 **METHOD DETAILS**

### 769 **Relative Dose Ratio Approach and Exposure Risk Model Derivation**

770 CEAT's relative dose ratio approach is based upon a mechanistic dose-response  
771 framework. The starting point for the inhalation dose model is to use the relationship that  
772 defines group-wide inhalation dose as a linear system where:

$$773 \quad E_{Group\ Dose} = \underline{C} \times \underline{Q}_{Inhalation} \times \Delta t \times Pe_{Total} \quad Eq.S1$$

774 and  $\underline{Q}_{Inhalation}$  is the average inhalation rate for the group,  $\underline{C}$  is the average concentration of  
775 the agent (in this case, aerosols containing SARS-CoV-2),  $\Delta t$  is the duration of group exposure,  
776 and  $Pe_{Total}$  is the number of people exposed in the group, which we assume is equal to the  
777 total number of people in the group . The  $E_{Group\ Dose}$  represents the total mass of contaminant  
778 that enters the respiratory tracts of all of the group by inhalation over the duration of the  
779 potential exposure or event. The fate or dynamics of the virus within the respiratory tract are  
780 not considered in the model and would be part of a transmission process. The critical variable  
781 that must be estimated by the model is the concentration of virus-containing aerosols that  
782 occurs as a result of the exhalation (i.e., breathing, speaking, coughing, singing) from people  
783 who are in close proximity and build up in a room over time.

784 There are a variety of ways of estimating concentration of contaminants in the air. Several  
785 commonly used methods include well-mixed box (WMB) models (Reinke and Keil 2009),  
786 computational fluid dynamic (CFD) models (Anthony 2009), and gaussian dispersion models  
787 (Stockie 2011). Computational fluid dynamics based models uses numerical solutions of the  
788 first principle equations of fluid flow and contaminant transport that are tailored to the specific  
789 geometry, scale and temporal lengths, and flow regimes, and are capable of modeling the  
790 complexities of particle dynamics, inhalation, exhalation, and interaction with flows in a  
791 building (Anthony 2009). Gaussian models use an explicit solution of the contaminant transport  
792 equations, and are, therefore, computationally fast compared to CFD models. Gaussian models

793 are typically used at larger scale lengths (100s of meters or more) and are used in outside  
794 environments, not typically used in indoor modeling (Zannetti 1990). The WMB model is a  
795 simple model that can be used to estimate concentrations of contaminants in the air. It treats a  
796 room as if it were a continuous stirred-tank reactor (CSTR) and uses the basic equations for  
797 concentration that were developed for modeling continuous reactors in chemical engineering.

798 The WMB (or zone) approach is widely used, and, for example, is the basis for the National  
799 Institutes of Standard and Technology's (NIST's) CONTAM indoor air quality model (Dols  
800 and Polidoro 2015). NIST has also applied a single zone WMB approach in its Fate and  
801 Transport of Indoor Microbiological Aerosols (FaTIMA), where it assumes rooms are single  
802 well-mixed zones (Dols et al. 2020).

803 The basic equation for the single zone WMB is shown below:

804 
$$V dt = \dot{M} dt - Q_{vent} C dt \quad Eq. S2$$

805 where  $V$  is the volume of the box,  $Q_{vent}$  is the ventilation rate (in units of volume per time)  
806 through the box, and  $\dot{M}$  is the emission rate (in units of mass per time) (**Fig. S1B**).

807 If we assume the emission rate is constant starting at time equals zero, the time varying  
808 equation takes the form:

809 
$$C(t) = \frac{\dot{M}}{Q_{vent}} \left( 1 - e^{-\frac{Q_{vent}}{V}t} \right) \quad Eq. S3$$

810 Once enough time has passed to achieve equilibrium, the model takes the simple form:

811 
$$C_{eq} = \frac{\dot{M}}{Q_{vent}} \quad Eq. S4$$

812 The basic simplifying assumption of the WMB model is that it assumes that a contaminant  
813 is instantaneously completely mixed throughout a volume of air. This instantaneously well-  
814 mixed assumption is a significant limitation when looking to determine the exposure between  
815 people in a room or space if they are in close proximity relative to the size of the room. The  
816 single zone well-mixed assumption results in the same exposure no matter how close or far  
817 people are located. Accordingly, methods that can assess the potential for higher concentrations  
818 (and exposures) that would result between closely clustered people would be useful for  
819 quantifying exposure, doses and associated risks.

820

## 821 **Near Field (NF) and Far Field (FF) Box Model**

822 In the field of industrial hygiene, it is recognized that the single zone box model may  
823 underestimate exposures experienced by receptors (i.e., people) close to a hazard, since it

824 assumes that the concentration is instantaneously well-mixed over the volume of the room  
 825 (Jaycock et al., 2011). While computational fluid dynamics is one option to resolve the spatial  
 826 complexity of dispersion and mixing of a contaminant, industrial hygienists have devised a  
 827 simpler way of estimating the high concentrations near a source using a “box within a box,”  
 828 with an inner box or near field (NF) box containing the contaminant source and a receptor, and  
 829 a larger, far field (FF), box that represents entire volume (e.g., room). (**Fig. S1C**) The time  
 830 dependent concentration at the receptor is estimated by adding the NF and FF concentration  
 831 contributions (Nicas 2009a; Nicas 2014).

$$832 \quad C(t) = C(t)_{NF} + C(t)_{FF} = \frac{\dot{M}}{Q_{NF}} \left( 1 - e^{-\frac{Q_{NF}}{V_{NF}} \Delta t} \right) + \frac{\dot{M}}{Q_{FF}} \left( 1 - e^{-\frac{Q_{FF}}{V_{FF}} \Delta t} \right) \text{ Eq. S5}$$

833 where,  $\dot{M}$  is the continuous mass release rate per minute of the contaminant of concern,  $Q_{NF}$   
 834 (or as referred to by Nicas as  $\beta$ ) is the NF volumetric flow rate ( $\text{m}^3$  per minute),  $Q_{FF}$  is the FF  
 835 volumetric flow rate ( $\text{m}^3$  per minute),  $V_{NF}$  is the NF volume ( $\text{m}^3$ ),  $V_{FF}$  is the FF volume (or  
 836 volume of the room or activity space) ( $\text{m}^3$ ), and  $\Delta t$  (minutes) is the elapsed time since the  
 837 start of the release.

838 If one assumes both boxes to be at equilibrium, the equation takes the simpler form:

$$839 \quad \underline{C}_{eq} = C_{eq,NF} + C_{eq,FF} = \frac{\dot{M}}{Q_{NF}} + \frac{\dot{M}}{Q_{FF}} \text{ Eq. S6}$$

840 Calculating the ventilation rates,  $Q_{NF}$  (or as referred to by Nicas as  $\beta$ ) and  $Q_{FF}$  using the  
 841 room volume and appropriate air change rate specific for each volume yields:

$$842 \quad \underline{C}_{eq} = \frac{\dot{M}}{V_{NF} \frac{ACH_{NF}}{60}} + \frac{\dot{M}}{V_{FF} \frac{ACH_{FF}}{60}} \text{ Eq. S7}$$

843 where  $ACH_{NF}$  is the NF air change rate ( $\text{hr}^{-1}$ ), and  $ACH_{FF}$  is the FF air change rate ( $\text{hr}^{-1}$ ). For  
 844 the time dependent form, since the volumes in the exponential term cancel themselves out, the  
 845 following results:

$$846 \quad C(t) = \frac{\dot{M}}{V_{NF} \frac{ACH_{NF}}{60}} \left( 1 - e^{-\frac{ACH_{NF}}{60} \Delta t} \right) + \frac{\dot{M}}{V_{FF} \frac{ACH_{FF}}{60}} \left( 1 - e^{-\frac{ACH_{FF}}{60} \Delta t} \right) \text{ Eq. S8}$$

847  
 848 In the application of NF and FF models, it is recommended (Nicas 2009a; Nicas 2016) that  
 849 the NF flow rate,  $Q_{NF}$  (or  $\beta$ ), be equal to  $\frac{1}{2} \times S \times FSA$  where FSA is the free surface area of  
 850 the assumed NF control volume and S is a random air speed (instantaneous in random direction)  
 851 at the interface of the NF and FF zones and  $\frac{1}{2}$  is used assuming that half of the air volume is

852 entering the control volume and half of the air is leaving the control volume. Further, Nicas  
853 recommends using  $s=15.1$  meters per minute (50 feet per minute) when strong air currents are  
854 present and  $s=3.0$  meters per minute (10 feet per minute) when air currents are lacking near the  
855 NF zone (Nicas 2014). A median random air speed for indoor office and home spaces was  
856 observed by Baldwin and Maynard, 1998 (Baldwin and Maynard 1998) to be between 0.05 and 0.1  
857 meters per second. Nicas, 2014 (Nicas 2014), referencing Baldwin and Maynard, 1998 (Baldwin  
858 and Maynard 1998), recommends that the typical value of 0.06 meters per second (3.6 meters  
859 per minute), may be used with the *FSA* approach in indoor settings. Accordingly, in  $ACH_{NF}$   
860 can be calculated using the *FSA* approach as follows:

$$861 \quad ACH_{NF} = \frac{\frac{1}{2} \times s \times FSA \times 60}{V_{NF}} \quad Eq. S9$$

862 As we will show, the *FSA* approach when applied using typical values for median random  
863 airspeed did not predict concentrations that align well with measured data. Accordingly, we  
864 have devised an alternative way of calculating the  $ACH_{NF}$  using an effective value for the  
865 random air speed we call  $s_{eff}$  that varies with distance from the source and is derived from  
866 an estimate of the eddy diffusivity. To do this we examined the gaussian/ eddy diffusivity  
867 equations and show that the NF/FF equations can be equivalent in certain cases to the continuous,  
868 gaussian solution of the dispersion equation when there is no advection (i.e., mean wind speed  
869 is equal to zero). Through this analysis, we can formulate a NF/FF model that uses eddy  
870 diffusivity rather than relying on the Baldwin and Maynard, 1998 reported random air speed to  
871 provide the mixing dynamics. To illustrate this, we start with side-by-side derivations for 1) a  
872 continuous point release using the gaussian approach, 2) the NN/FF model using a spherical  
873 NF volume, and 3) the NN/FF model using a hexagonal prism NF volume, as shown in **Table**  
874 **S4**. In all three cases, we arrive at equations for concentration that are nearly identical.  
875 Assuming the same values were used for  $K$  and distance from the source, all three  
876 representations would provide nearly the same result – even the hexagonal prism representation  
877 since 6 is within five percent of  $2\pi$ .

878 The challenge in using an eddy diffusivity model is determining the appropriate value  
879 for  $K$  (Nicas 2009b). It is important to note that in the derivation of the gaussian solution, the  
880 value for  $K$  is assumed to be constant over the domain (Stockie 2011). The form of the  
881 equation for  $K$  that we arrive at,  $K = x \cdot s$ , is similar to the form suggested by  
882 Venkatram and Weil, 2021 (Venkatram and Weil 2021),  $K = \alpha \cdot u \cdot l$ . Venkatram and  
883 Weil, 2021 (Venkatram and Weil 2021) describe  $\alpha$  as a dimensionless value that would be

884 determined experimentally;  $u$  is a representative velocity, and  $l$  was a representative length.  
885 For now we will assume that  $\alpha = 1$ , such that in our case  $K = D \cdot s$ .

886 Cheng et al. 2011 (Cheng et al. 2011) show a relationship between the air change rate  
887 for a room and the eddy diffusivity using experimental measurements of carbon monoxide  
888 released in two indoor environments. The data from these experiments are presented in their  
889 paper and in Acevedo-Bolton et al. 2012 (Acevedo-Bolton et al. 2012). These approaches  
890 capture the additional turbulent kinetic energy that is added to the system through the higher  
891 air changes through ventilation or increased mixing of the air (e.g., through the HVAC  
892 system circulating the air) (Cheng et al. 2011; Venkatram and Weil 2021). This approach  
893 provides for a constant eddy diffusivity within the room and does not suggest dependency of  
894 the eddy diffusivity on the distance from the source. The recommend the eddy diffusivity  
895 ( $\text{m}^2 \text{sec}^{-1}$ ) is calculated using the mechanical  $ACH_{FF}$  (air change rate in  $\text{hr}^{-1}$ ) and,  $V$ , the  
896 overall volume of the room ( $\text{m}^3$ ), as follows:

$$897 \quad K = (0.52 ACH_{FF}/3600 + 8.61 \times 10^{-5}) V^{2/3} \quad Eq.S10$$

898 Venkatram and Weil, 2021 (Venkatram and Weil 2021), using the same datasets suggest a  
899 more simple but similar relationship:

$$900 \quad K = V^{2/3} ACH_{FF} / 3600 \quad Eq.S11$$

901 Foat, et al., 2020 (Foat et al. 2020) recommend a similar relationship that was arrived at  
902 through CFD simulations over a wide of range of indoor parameters:

$$903 \quad K = 0.824 V^{2/3} N^{-2/3} ACH_{FF} / 3600 \quad Eq.S12$$

904 where  $N$  equals to the number of inlet vents for the room. Foat, et al., 2020 (Foat et al.  
905 2020) looked at a range of room volumes between  $50 \text{ m}^3$  and  $5000 \text{ m}^3$ , floor aspect ratios  
906 (length/width) between 1-3, height/(floor area)<sup>2</sup> ratio between 0.1 and 1.5, and air change rate  
907 between  $0.6$  and  $19.9 \text{ hr}^{-1}$ . In most modern buildings, the number of vents would increase with  
908 increasing volume or area. Across the range of 235 scenarios that were modeled, the number  
909 of vents per  $100 \text{ m}^2$  of area ranged from 3.8 to 8 vents per  $100 \text{ m}^2$  (excluding the four extreme  
910 values of approximately 50 vents per  $100 \text{ m}^2$ ), and averaged 4.6 vents per  $100 \text{ m}^2$ . To limit the  
911 number of variables that the user needs to know or determine to use CEAT, we replace  $N$  with  
912 a relationship between the area of the room and a reasonable number of vents per unit area,  
913 examining values ranging from 3 to 8 vents per  $100 \text{ m}^2$ .



914 By combining the two representations of the eddy diffusivity equations and assuming that  
 915 the product of  $D$  and  $s$  is a constant, we can calculate an effective velocity  $s_{eff}$  (in  $m \text{ min}^{-1}$ )  
 916 that is consistent with a constant eddy diffusivity at all distances from the source.

917 
$$D \cdot s_{eff} = K \quad Eq.S13$$

918

919 
$$s_{eff} = \frac{K}{D} \quad Eq.S14$$

920

921 Below are the Venkatram and Weil, 2021(Venkatram and Weil 2021) and Foat, et al., 2020  
 922 (Foat et al. 2020) solutions for  $K$  expressed as  $s_{eff}$ (in  $m \text{ min}^{-1}$ ):

923 
$$s_{eff} = \frac{V^{2/3} ACH_{FF} / 60}{D} \quad Eq.S15$$

924

925 
$$s_{eff} = \frac{0.824 V^{2/3} N^{-2/3} ACH_{FF} / 60}{D} \quad Eq.S16$$

926

927 Since all three  $K$  and  $ACH$  relationships are constant with respect to  $D$ , the product of  $D \cdot$   
 928  $s_{eff}$  is a constant, thus any change in  $s$  is inversely proportional with the change in  $D$ .  
 929 Therefore, as  $D$  increases moving away from a source, the value of  $s_{eff}$  decreases.

930 Now we come back to the relationship of  $K = \alpha \cdot u \cdot l$  or expressed in our variables  
 931  $K = \alpha \cdot s_{eff} \cdot D$  and define  $\alpha$ , adjustments for the eddy diffusivity, as a means of  
 932 capturing any dependency of  $K$  on distance from the source and adjustment to the dependence  
 933 on  $ACH$  in the form (should measurement data indicate there are dependencies):

934 
$$\alpha = \lambda x^\mu \cdot \varepsilon ACH_{FF}^\gamma \quad Eq.S17$$

935

936 Substituting the equation for  $K$  into our original equation and rearranging so that the FSA  
 937 of the hexagon is still calculated, we arrive at:

938 
$$\underline{C}_{pq} = \frac{\dot{M}}{\frac{\varepsilon}{2}(D^2 + D h_{bz}) \alpha \cdot s_{eff}} \quad Eq.S18$$

939 and  $ACH_{NF}$  is

940 
$$ACH_{NF} = \frac{\frac{6}{2} (D^2 + D h_{bz}) \alpha \cdot s_{eff} \cdot 60}{V_{NF}} \quad Eq.S20$$

941 To calculate an average inhalation dose over a period of time, assuming that the initial  
942 concentration is zero ( $C(0) = 0$ ) from a single source, we estimate the average dose by  
943 calculating the concentration at the midpoint of the duration,  $\frac{\Delta t}{2}$ .

$$944 \quad \underline{C}_{AVE} = \frac{\dot{M}}{V_{NF} \frac{ACH_{NF}}{60}} \left( 1 - e^{-\frac{ACH_{NF}\Delta t}{60 \cdot 2}} \right) + \frac{\dot{M}}{V_{FF} \frac{ACH_{FF}}{60}} \left( 1 - e^{-\frac{ACH_{FF}\Delta t}{60 \cdot 2}} \right) \text{ Eq. S21}$$

945 As the duration increases, the factors  $\left( 1 - e^{-\frac{ACH_{NF}\Delta t}{60 \cdot 2}} \right)$  and  $\left( 1 - e^{-\frac{ACH_{FF}\Delta t}{60 \cdot 2}} \right)$  will converge  
946 on 1. Given that  $ACH_{NF}$  is likely greater than  $ACH_{FF}$  the factor  $\left( 1 - e^{-\frac{ACH_{NF}\Delta t}{60 \cdot 2}} \right)$  will converge  
947 faster than the factor  $\left( 1 - e^{-\frac{ACH_{FF}\Delta t}{60 \cdot 2}} \right)$ . Meaning, the near field term will achieve equilibrium  
948 faster than the far field term.

949

## 950 **Validation the of the Single Source Equation with Measurement Data**

951 We compare predictions calculated using Equation S20 to measurements of chemical and  
952 aerosol releases in indoor environments that characterize concentrations at various distances  
953 from sources. We included data from carbon monoxide (CO) releases in two homes (Acevedo-  
954 Bolton et al. 2012; Cheng et al. 2014)(Acevedo-Bolton, et al., 2012), toluene releases in a test  
955 chamber (Zhang et al. 2009), benzene releases in an industrial environment (Nicas et al. 2007)  
956 and liquid aerosols containing lactose released to simulate an actual COVID-19 transmission  
957 incident that occurred in a Swiss court room (Vernez et al. 2021). The study of carbon monoxide  
958 (CO) releases (Cheng et al. 2011; Acevedo-Bolton et al. 2012; Cheng et al. 2014) occurred in  
959 two residential homes where seventeen separate 8-hour tests with continuous emission rates  
960 were conducted. Measurement distances from the source ranged from 0.25 meters through to  
961 5 meters. The chamber tests conducted by Zhang, et al., 2007 involved simultaneous  
962 measurements at four points that were 0.1 meters from a release point. Across the dataset, the  
963 distance from the source varied between 0.1 meters and 5 meters, the room volumes varied  
964 between  $3 \text{ m}^3$  and  $50,000 \text{ m}^3$ , and the air changes per hour between 0.17 and  $218 \text{ hr}^{-1}$ . We also  
965 examined an example case that was presented by Nicas 2009 (Nicas 2009a), where the  
966 conventional NF/FF approach is applied.

967 Examination of the performance of the three eddy diffusivity models (assuming that no  
968 adjustment is necessary and that value of  $\alpha = 1$  for the expression in **Eq. S17**) shows that the  
969 best model above  $0.75 \text{ hr}^{-1}$  is the Foat, et al., 2020 (Foat et al. 2020) equation with an  $R^2 = 0.94$

970 (Fig. S2B) when the number of vents per 100 m<sup>2</sup> is equal to 4. The best model below 0.75 hr<sup>-1</sup>  
971 is the Venkatram and Weil, 2021 (Venkatram and Weil 2021) model, with an R<sup>2</sup> = 0.92 (Fig.  
972 S2A). Acevedo-Bolton, et al. 2012 (Acevedo-Bolton et al. 2012) show in their analysis that the  
973 carbon monoxide sensors (measuring at 15 second time intervals) at 0.25 meters were likely  
974 seeing concentrations that were above the upper limits of the instrument's data logger (between  
975 128 and 150 ppm), resulting in an underestimate of average reported concentration. Our model  
976 systematically overpredicts the concentrations, as compared to the measured data, at 0.25  
977 meters and to a lesser degree at 0.5 meters. Consequently, we remove the 0.25 data from the  
978 dataset.

979 The major difference between the two models is the inclusion of a factor that captures the  
980 number of vents. It is reasonable to assume that spaces with very low air change rates do not  
981 have vents (or do not have functional vents), so the inclusion of the number of vents in the  
982 equation is not meaningful and in low air change rates the Venkatram and Weil,  
983 2021 (Venkatram and Weil 2021) equation is sufficient. Also, the lower limit of the air change  
984 rate in the Foat, et al., 2020 (Foat et al. 2020) dataset was 0.6 hr<sup>-1</sup> and only three of the 235  
985 modeled scenarios analyzed had air change rates less than 0.75 hr<sup>-1</sup>. Given that (1) most  
986 commercial and institutional facilities will have air change rates that are greater than 1 hr<sup>-1</sup>, (2)  
987 would have an additional air change rate term to account for HVAC recirculation and filtration,  
988 and (3) these facilities' HVAC systems will include inlet vents, it is important to use a method  
989 that addresses the effect of vents on dispersion and is accurate at high air change rates. Also,  
990 given that the risks of COVID-19 exposure are highest when the air change rates are low such  
991 as when natural ventilation is relied upon, it is important to have a method that works well in  
992 those conditions. The Acevedo-Bolton, et al., 2012 (Acevedo-Bolton et al. 2012) dataset and  
993 the Venkatram and Weil, 2021 (Venkatram and Weil 2021) estimate for eddy diffusivity cover  
994 those low air change rate scenarios.

995 Based upon these factors and our analysis, in the CEAT model, we use the unadjusted  
996 Venkatram and Weil, 2021 (Venkatram and Weil 2021) model to estimate eddy diffusivity at  
997 air change rates at or below 0.75 hr<sup>-1</sup> and the Foat, et al., 2020 model (Foat et al. 2020) to  
998 estimate eddy diffusivity above 0.75 hr<sup>-1</sup> with an assumption of 4 vents per 100 m<sup>2</sup>. The results  
999 of this combined model compared to the measured data, are shown in Fig. S2C.

## 1000 Multiple Sources

1001 Equation S21 provides an estimate of the average concentration from one person's emission  
1002 at a receptor, but not the contribution of how multiple people's emissions would affect the

1003 concentration. To address multiple sources in combination, the additivity property of the  
 1004 “superposition principle of linear systems” can be applied (Illingworth 1991), which enables  
 1005 that the effect of each person’s emissions at a receptor can be calculated separately and  
 1006 summed. The superposition principle has been applied to outdoor air pollution dispersion  
 1007 modeling (Stockie 2011) and provides the theoretical basis for modeling complex scenarios  
 1008 involving multiple emission sources in outdoor gaussian plume models such as EPA’s  
 1009 AIRMOD (US EPA 2019). The logic is, therefore, if a NF and FF approach can be used to  
 1010 estimate the higher concentration in the close proximity of one person to another person, then  
 1011 if  $n$  people were added to the system, and  $n$  additional NF boxes were added, the terms would  
 1012 be added to the equation for each person (i.e., emission source), with each being independent  
 1013 and summing to total concentration, as shown below:

$$1014 \quad C_{AVE} = \sum_{Pe=1}^N \left[ \left( \frac{\dot{M}}{V_{NF} \frac{ACH_{NF}}{60}} \right) \left( 1 - e^{-\frac{ACH_{NF}\Delta t}{60^2}} \right) + \left( \frac{\dot{M}}{V_{FF} \frac{ACH_{FF}}{60}} \right) \left( 1 - e^{-\frac{ACH_{FF}\Delta t}{60^2}} \right) \right]_N$$

1015 *Eq. S22*

1016 The superposition principle also includes a homogeneity property, which allows us to  
 1017 apply a scalar factor across all emission sources resulting in the concentration at the receptor  
 1018 changing proportionally to the value of the scalar. This property provides the conceptual basis  
 1019 that allows one to conclude that if the emission rate from each source is increased or decreased  
 1020 by a factor, that one could assume the concentration would increase or decrease by the same  
 1021 factor. The scalar could also be the product of several scalars, including a probability factor.  
 1022 CEAT will use this property defining a scalars,  $\dot{M}$  and  $\varphi$ (phi), to adjust both the emission rate  
 1023 and the probability of the emission rate, assuming that the emission rate and the probability of  
 1024 emission rate are constant for all sources for a given scenario, resulting in the following  
 1025 equation:

$$1026 \quad C_{AVE} = \varphi \dot{M} \times \sum_{So=1}^N \left[ \left( \frac{1}{V_{NF} \frac{ACH_{NF}}{60}} \right) \left( 1 - e^{-\frac{ACH_{NF}\Delta t}{60^2}} \right) + \left( \frac{1}{V_{FF} \frac{ACH_{FF}}{60}} \right) \left( 1 - e^{-\frac{ACH_{FF}\Delta t}{60^2}} \right) \right]_N$$

1027 *Eq. S23*

1028 In a two-source system with one receptor, where the distance between the two receptors  
 1029 and the source equidistant shown in **Fig. S3A**, the following equation can be written:

$$\begin{aligned}
 1030 \quad C_{AVE} &= \varphi \dot{M} \times \sum_{So=1}^2 \left[ \left( 1 - e^{-\frac{ACH_{NF}\Delta t}{60 \cdot 2}} \right) \left( \frac{1}{V_{NF} \frac{ACH_{NF}}{60}} \right) \right. \\
 1031 \quad &\left. + \left( 1 - e^{-\frac{ACH_{FF}\Delta t}{60 \cdot 2}} \right) \left( \frac{1}{V_{FF} \frac{ACH_{FF}}{60}} \right) \right] \text{ Eq. S24}
 \end{aligned}$$

1032 Using a hexagonal prism for the NF volume allows one to place the system of equations on  
 1033 a regular grid of equidistant triangles (**Fig S3A**). Using a regular grid of equidistant triangles,  
 1034 as compared to a regular rectangular grid, has advantages since all nodes are equidistant from  
 1035 their nearest neighbors. This equidistant neighbor feature is particularly useful given the  
 1036 objective to assess various distancing options. The use of a triangular grid allows one to  
 1037 conveniently draw a hexagonal prism that is made up of six triangular prisms that approximates  
 1038 a cylinder, with each centered on the six closest nodes to the receptor, (**Fig. S3B**). The  
 1039 orientation of the triangular prism within the box makes no difference to the calculations.  
 1040 Accordingly, we can rotate each of the triangular prisms 180 degrees for visual convenience  
 1041 (**Fig. S3C**). We do this because we can define the system identically from two perspectives,  
 1042 the source view and the receptor view.

1043 The system shown in **Fig. S3D** can be used to evaluate both the NF and FF concentrations  
 1044 from up to six sources at the receptor in the center, using the equation below.

$$\begin{aligned}
 1045 \quad C_{AVE} &= \varphi \dot{M} \times \sum_{So=1}^6 \left[ \left( 1 - e^{-\frac{ACH_{NF-1st}\Delta t}{60 \cdot 2}} \right) \left( \frac{1}{V_{NF} \frac{ACH_{NF-1st}}{60}} \right) \right. \\
 1046 \quad &\left. + \left( 1 - e^{-\frac{ACH_{FF}\Delta t}{60 \cdot 2}} \right) \left( \frac{1}{V_{FF} \frac{ACH_{FF}}{60}} \right) \right] \text{ Eq. S25}
 \end{aligned}$$

1047 We can calculate the  $ACH_{NF}$  using the equation derived earlier for a hexagon:

$$1048 \quad ACH_{NF-1st Ring} = \frac{\frac{6}{2} (D^2 + D h_{bz}) \alpha \cdot s_{eff} \cdot 60}{V_{NF}} \text{ Eq. S26}$$

1049 By substituting for the  $V_{NF}$ ,

$$1050 \quad ACH_{NF-1st Ring} = \frac{\frac{6}{2} (D^2 + D h_{bz}) \alpha \cdot s_{eff} \cdot 60}{\frac{6}{2} (D^2 + D h_{bz})} \text{ Eq. S27}$$

1051 Which simplifies to:

$$1052 \quad ACH_{NF-1st Ring} = \alpha \times s_{eff} \times \left( \frac{1}{h_{bz}} + \frac{1}{D} \right) \times 60 \text{ Eq. S28}$$

1053 In the same way that a six source system was devised, a 12-source system that still keeps  
 1054 each person in the system  $D$  distance apart, but in this case is located two  $D$  away from the  
 1055 receptor. In this case, instead of a hexagon, a dodecagonal prism (12-sided prism) is drawn  
 1056 (Fig. 3F). In the 12-source system, we take 1/12th of the emissions and use 1/12 of the total  
 1057 dodecagonal prism volume. The  $ACH_{NF}$  is calculated using the dimension of the 1/12 triangular  
 1058 wedge which is derived as follows.

$$1059 \quad ACH_{NF-2nd} = \frac{\frac{1}{2} \times \alpha \times s_{eff} \times (2 \times 0.933(D))^2 + h_{bz} \times D}{0.933(D)^2 (h_{bz})} \times 60 \quad Eq.S29$$

1060 Which simplifies to:

$$1061 \quad ACH_{NF-2nd} = \alpha \times s_{eff} \times \left( \frac{1}{h_{bz}} + \frac{1}{1.866 \times D} \right) \times 60 \quad Eq.S30$$

1062 Successive rings, out to nine rings are included in CEAT, to allow up to a maximum of 270  
 1063 people. Each ring adds 6 additional people more than the previous ring (i.e, the first ring holds  
 1064 6 people, the second ring holds 12 people, the third ring holds 18, etc.) (Fig S3E). Table S5  
 1065 has the equations for the area of each of the triangular prisms, along with the equation used to  
 1066 calculate the  $ACH_{NF}$  for each ring.

1067 Applying the superposition principle, the contribution of each person on the receptor at the  
 1068 center can be calculated. Going out to 60 sources (four rings) we get:

$$1069$$

$$1070 \quad C_{AVE} = \phi \dot{M} \times \left( \sum_{S_0=1}^6 \left( 1 - e^{-\frac{ACH_{NF-1st}\Delta t}{60 \times \frac{1}{2}}} \right) \left( \frac{1}{V_{NF} \frac{ACH_{NF-1st}}{60}} \right) + \left( 1 - \right. \right.$$

$$1071 \quad \left. \left. e^{-\frac{ACH_{FF}\Delta t}{60 \times \frac{1}{2}}} \right) \left( \frac{1}{V_{FF} \frac{ACH_{FF}}{60}} \right) + \right.$$

$$1072 \quad \left. \sum_{S_0=7}^{18} \left( 1 - e^{-\frac{ACH_{NF-2nd}\Delta t}{60 \times \frac{1}{2}}} \right) \left( \frac{1}{V_{NF} \frac{ACH_{NF-2nd}}{60}} \right) + \left( 1 - e^{-\frac{ACH_{FF}\Delta t}{60 \times \frac{1}{2}}} \right) \left( \frac{1}{V_{FF} \frac{ACH_{FF}}{60}} \right) + \right.$$

$$1073 \quad \left. \sum_{S_0=19}^{36} \left( 1 - e^{-\frac{ACH_{NF-3rd}\Delta t}{60 \times \frac{1}{2}}} \right) \left( \frac{1}{V_{NF} \frac{ACH_{NF-3rd}}{60}} \right) + \left( 1 - e^{-\frac{ACH_{FF}\Delta t}{60 \times \frac{1}{2}}} \right) \left( \frac{1}{V_{FF} \frac{ACH_{FF}}{60}} \right) + \right.$$

$$1074 \quad \left. \sum_{S_0=37}^{60} \left( 1 - e^{-\frac{ACH_{NF-4th}\Delta t}{60 \times \frac{1}{2}}} \right) \left( \frac{1}{V_{NF} \frac{ACH_{NF-4th}}{60}} \right) + \left( 1 - e^{-\frac{ACH_{FF}\Delta t}{60 \times \frac{1}{2}}} \right) \left( \frac{1}{V_{FF} \frac{ACH_{FF}}{60}} \right) \right) \quad Eq.S31$$

1075 The formula may be simplified by pulling out the factors common in the two terms and  
 1076 rearranging as follows:



$$\begin{aligned}
 1077 \quad C_{AVE} &= \varphi \dot{M} S_{O_{Total}} \left( 1 - e^{-\frac{ACH_{FF}\Delta t}{60}} \right) \left( \frac{1}{V_{FF} \frac{ACH_{FF}}{60}} \right) + \varphi \dot{M} \left( \sum_{S_o=1}^6 \left( 1 - \right. \right. \\
 1078 \quad & e^{-\frac{ACH_{NF-1st}\Delta t}{60}} \left. \left. \right) \left( \frac{1}{V_{NF} \frac{ACH_{NF-1st}}{60}} \right) + \right. \\
 1079 \quad & \sum_{S_o=7}^{18} \left( 1 - e^{-\frac{ACH_{NF-2nd}\Delta t}{60}} \right) \left( \frac{1}{V_{NF} \frac{ACH_{NF-2nd}}{60}} \right) + \\
 1080 \quad & \sum_{S_o=19}^{36} \left( 1 - e^{-\frac{ACH_{NF-3rd}\Delta t}{60}} \right) \left( \frac{1}{V_{NF} \frac{ACH_{NF-3rd}}{60}} \right) + \\
 1081 \quad & \left. \sum_{S_o=37}^{60} \left( 1 - e^{-\frac{ACH_{NF-4th}\Delta t}{60}} \right) \left( \frac{1}{V_{NF} \frac{ACH_{NF-4th}}{60}} \right) \right) \text{ Eq. S32}
 \end{aligned}$$

## 1082 Calculating the effective $ACH_{FF}$ and $ACH_{NF}$ to address sinks and turbulence

1083 For the purposes of calculating the far field concentration term, the  $ACH_{FF}$  should include  
 1084 any mechanisms that remove air from the space (e.g., natural ventilation, infiltration  
 1085 mechanical ventilation), mechanisms that remove the contaminant from the space (e.g.,  
 1086 filtration and deposition), and mechanisms inactivate contaminants (e.g., reaction, temperature,  
 1087 humidity, radiation).

$$\begin{aligned}
 1088 \quad ACH_{FF} &= ACH_{Nat.l Vent} + ACH_{Infiltr.} + ACH_{Mech.Vent} + ACH_{HVAC Re.} + ACH_{Inact.} \\
 1089 \quad &+ ACH_{Dep} \text{ Eq. S33}
 \end{aligned}$$

1090 The  $ACH_{HVAC Re.}$  be based upon the flow rate and the portion of the recirculated air from which  
 1091 any contaminants has been removed ( $ACH_{HVAC Re} \times Ef_{Filter}$ ):

$$\begin{aligned}
 1092 \quad ACH_{FF} &= ACH_{Nat.l Vent} + ACH_{Infiltr.} + ACH_{Mech.Vent} + ACH_{HVAC Re.} \times Ef_{Filter} \\
 1093 \quad &+ ACH_{Inact.} + ACH_{Dep} \text{ Eq. S34}
 \end{aligned}$$

1094 For the purposes of calculating the eddy diffusivity, the  $ACH_{FF}$  should only include  
 1095 mechanisms that result in actual air flow. So the  $ACH_{Inact.}$  and  $ACH_{Dep}$  have not been  
 1096 included and the unreduced  $ACH_{HVAC Recirc}$  should be used, as shown.

$$1097 \quad ACH_{FF Eddy Diff} = ACH_{Nat.l Vent} + ACH_{Infiltr.} + ACH_{Mech.Vent} + ACH_{HVAC Re.} \text{ Eq. S35}$$

1098 For the final  $ACH_{NF}$ , the  $ACH_{Inact.}$  and  $ACH_{Dep}$  should be added back in, as shown below  
 1099 for the 1st Ring of sources:

1100 
$$ACH_{NF-1st\ Ring} = \alpha \times s_{eff} \times \left( \frac{1}{h_{bz}} + \frac{1}{D} \right) \times 60 + ACH_{Inact.} + ACH_{Dep} \text{ Eq.S36}$$

1101 **Dose Model**

1102 As stated earlier, we employ a basic inhalation dose model:

1103 
$$\underline{D}_{Quanta} = \underline{C}_{AVE} \times Q_{inhale} \times \Delta t \text{ Eq.S37}$$

1104 Where,  $\underline{D}_{Quanta}$  is the quantity of inhaled infectious material,  $\underline{C}_{AVE}$  is average air  
1105 concentration over the duration (mass/m<sup>3</sup>),  $Q_{inhale}$  the inhalation rate (m<sup>3</sup>/min), and  $\Delta t$  is the  
1106 duration of exposure (min).

1107 Since we are looking at this model from a worker safety perspective, we can also look at  
1108 the total inhalation dose of all people in an activity space by multiplying the total number of  
1109 people, assuming we are using, ideally, an average concentration and the same duration in the  
1110 activity space.

1111 
$$\underline{D}_{Quanta} = \underline{C}_{AVE} \times Q_{inhale} \times \Delta t \times Pe_{Total} \text{ Eq.S38}$$

1112 The concentration contributions are calculated for a person assumed to be at the center of  
1113 a triangular grid where people are spaced equidistantly (based upon the distancing specified).  
1114 We assume the concentration at the center is representative for all people in the group since: 1)  
1115 each person's location is likely not static during the activity and 2) exposure is driven mostly  
1116 by the close-in sources (i.e., other people) and all people have close-in sources.

1117 If we include mask effectiveness in the model, recognizing that there is an effect on both  
1118 the inhalation side ( $1 - Ef_{in}$ ) and on the exhalation side ( $1 - Ef_{out}$ ), the equation takes the  
1119 following form:

1120 
$$\underline{D}_{Quanta} = (1 - Ef_{out}) \times C_{AVE} \times Q_{inhale} \times (1 - Ef_{in}) \times \Delta t \times Pe_{Total} \text{ Eq.S39}$$

1121 This equation calculates the total inhalation dose that a worst-case person (located at a  
1122 receptor at the center of all rings) would receive if all people were emitting at a rate  $\dot{M}$  for the  
1123 exposure duration. It assumes that all people are emitters (i.e., infected), when in fact only a  
1124 few may be emitters. Based upon the *homogeneity property* of the *principle of superposition*,  
1125  $\phi$ , in the expanded dose equation can be the likelihood that a person is infected, as shown  
1126 below.

1127 
$$\underline{D}_{Quanta} = (1 - Ef_{out}) \times Q_{inhale} \times (1 - Ef_{in}) \times \Delta t \times Pe_{Total} \times$$

$$\begin{aligned}
 & ( \varphi \dot{M} Pe_{Emitting} \left( 1 - e^{-\frac{ACH_{FF}\Delta t}{60}} \right) \left( \frac{1}{V_{FF} \frac{ACH_{FF}}{60}} \right) + \varphi \dot{M} \left( \sum_{Pe=1}^6 \left( 1 - \right. \right. \\
 & e^{-\frac{ACH_{NF-1st}\Delta t}{60}} \left. \left. \right) \left( \frac{1}{V_{NF} \frac{ACH_{NF-1st}}{60}} \right) + \right. \\
 & \sum_{Pe=7}^{18} \left( 1 - e^{-\frac{ACH_{NF-2nd}\Delta t}{60}} \right) \left( \frac{1}{V_{NF} \frac{ACH_{NF-2nd}}{60}} \right) + \\
 & \sum_{Pe=19}^{36} \left( 1 - e^{-\frac{ACH_{NF-3rd}\Delta t}{60}} \right) \left( \frac{1}{V_{NF} \frac{ACH_{NF-3rd}}{60}} \right) + \\
 & \left. \sum_{Pe=37}^{60} \left( 1 - e^{-\frac{ACH_{NF-4th}\Delta t}{60}} \right) \left( \frac{1}{V_{NF} \frac{ACH_{NF-4th}}{60}} \right) \dots \right) \text{ Eq. S40}
 \end{aligned}$$

or written more succinctly,

$$\begin{aligned}
 \underline{D}_{Quanta} &= (1 - Ef_{out}) \times Q_{inhale} \times (1 - Ef_{in}) \times \Delta t \times Pe_{Total} \times \varphi \dot{M} \\
 &\times \sum_1^{Pe_{Total}-1} (FF_{Factor} + NF_{Factor}) \text{ Eq. S41}
 \end{aligned}$$

where,

$$\begin{aligned}
 FF_{Factor} &= \left( 1 - e^{-\frac{ACH_{FF}\Delta t}{60}} \right) \left( \frac{1}{V_{FF} \frac{ACH_{FF}}{60}} \right) \text{ Eq. S43} \\
 NF_{Factor} &= \sum_{Pe=1}^6 \left( 1 - e^{-\frac{ACH_{NF-1st}\Delta t}{60}} \right) \left( \frac{1}{V_{NF} \frac{ACH_{NF-1st}}{60}} \right) + \\
 &\sum_{Pe=7}^{18} \left( 1 - e^{-\frac{ACH_{NF-2nd}\Delta t}{60}} \right) \left( \frac{1}{V_{NF} \frac{ACH_{NF-2nd}}{60}} \right) + \\
 &\sum_{Pe=19}^{36} \left( 1 - e^{-\frac{ACH_{NF-3rd}\Delta t}{60}} \right) \left( \frac{1}{V_{NF} \frac{ACH_{NF-3rd}}{60}} \right) + \\
 &\sum_{Pe=37}^{60} \left( 1 - e^{-\frac{ACH_{NF-4th}\Delta t}{60}} \right) \left( \frac{1}{V_{NF} \frac{ACH_{NF-4th}}{60}} \right) \dots \text{ Eq. S44}
 \end{aligned}$$

Additional terms can be added to Eq. S44 for each hexagonal ring as more people are added. CEAT allows up to 250 people.

## 1144 **Impact of Prevalence of Infection in Community**

1145 Critical to the exposure assessment is the consideration of the likelihood that any individual  
1146 member of the group is infectious at the start of the scenario or modeled event, with the  
1147 likelihood of infection represented by the variable  $\varphi$ . In the CEAT model, the range of  
1148 likelihood of infectiousness in the group can range from 1.0 (certain infectiousness) on the high  
1149 end, to a value on the low end that is 100 times less than what is estimated as the community  
1150 average infectiousness. In all of the cases, we assume that at least one person is not infectious,  
1151 so the population that could be infectious is the size of the group,  $P_e$ , minus 1.

1152 We estimate the community average infectiousness by using the reported 7-day average  
1153 per 100,000 of diagnosed cases ( $Cases_{Per\ 100000}$ ), an estimate of the ratio of the undiagnosed  
1154 cases over the diagnosed cases ( $R_{Undiag}$ ), and the average length of an infectiousness in days,  
1155 ( $D_{Inf}$ ), multiplied by the subgroup factor, which is the adjustment of the subgroup's rate of  
1156 infectiousness as compared to the rate of infectiousness of the community.

$$1157 \quad \varphi = \left(1 - \left(1 - R_{Undiag} \times \frac{Cases_{Per\ 100000}}{100,000}\right)^{D_{Inf}}\right) 100,000 \times \text{Group Factor} \quad Eq. S45$$

1158 We assume that within a community, the population can be subdivided into subpopulations  
1159 as follows:

- 1160 1. Group Factor = 0.01 The Group is composed of people who, prior to the event are  
1161 estimated as having a likelihood COVID-19 infection that is 100 times lower than the  
1162 community's average due to their adhering to public health guidance on distancing,  
1163 masking, and exposure to crowds/people.
- 1164 2. Group Factor = 0.1 The Group is composed of people who, prior to the event are  
1165 estimated as having a likelihood COVID-19 infection that is 10 times lower than the  
1166 community's average due to their adhering to public health guidance on distancing,  
1167 masking, and exposure to crowds/people.
- 1168 3. Group Factor = 1 The Group is composed of people who, prior to the event are  
1169 estimated as having a likelihood COVID-19 infection that is equal to the community's  
1170 average.
- 1171 4. Group Factor = 0.1 The Group is composed of people who, prior to the event are  
1172 estimated as having a likelihood COVID-19 infection that is 10 times higher than the  
1173 community's average due to their not adhering to public health guidance on distancing,  
1174 masking, and exposure to crowds/people.
- 1175 5.  $\varphi = 1$  The group is composed of people who are known to be infectious.

## 1176 **Impact of Variants**

1177 We handle the current community prevalence of variants and the relative infectiousness of  
1178 the prevalent variants by assuming that some variants may be significantly more or less  
1179 transmissible than other variants. For the fraction of total cases of more infectious variants, we  
1180 can adjust the fractional exposure upward or downward to account for its infectiousness.

1181

## 1182 **Efficacy of Immunity**

1183 Immunities, including vaccination and recovered cases, are addressed in two ways:

- 1184 1. It reduces the rate of virus shedding of immunized persons who do become infected,  
1185 thus reducing the emission rate,  $\dot{M}$ , for the fraction of people with immunity; this is  
1186 based upon a 3 times reduction in shedding observed by (Levine-Tiefenbrun et al.  
1187 2021).
- 1188 2. The immunity is treated as a barrier to infection with an effectiveness that is equal to  
1189 its published efficacy based conceptually on the model used by the EPA for dose and  
1190 exposure definition (US EPA 2019).

1191 We are assuming that immunity gained by recovery from COVID is equal to the immunity  
1192 gained from vaccination.

1193

## 1194 **Efficacy of Testing**

1195 We address the efficacy and timing of testing regimes, relative to the days an individual is  
1196 expected to be infectious. We assume that if an individual is infectious, at the time of the event,  
1197 the timing of the infection prior to the event is a uniform distribution. For example, if  $D_{Inf} =$   
1198 5, and they were tested three days prior to the event, there is a  $3/5$  chance they were infected  
1199 when they were tested and a  $2/5$  chance they got infected after they were tested (in the two  
1200 subsequent days before the event). Assuming a testing false negative rate ( $R_{False Neg.}$ ) of 10%,  
1201 the testing adjustment factor, which assumes testing was performed three days before the event,  
1202 is computed as follows:

- 1203 • If  $D_{Inf} < 3$ , there is no adjustment to the likelihood that an individual is infectious  
1204 because testing was performed prior to anyone becoming infectious.
- 1205 • If the  $D_{Inf} \geq 3$ , the testing adjustment is computed as the  
1206 weighted likelihood of either (a) having been infected at the

1207 time of testing *and* obtaining a false negative test or (b) becoming infected after  
 1208 the test:

$$1209 \quad Test_{Adjust} = \frac{(D_{Inf} - 2)}{D_{Inf}} R_{False Neg.} + \frac{2}{D_{Inf}}$$

1210 where  $R_{False Neg.}$  is currently set to 0.10.

### 1211 **Relative Dose Ratio Approach: How we establish the baseline**

1212 Rather than directly calculating a dose-response, we use a comparative dose approach. We  
 1213 compare all scenarios to a baseline scenario discussed in **Table S2**. The model's results are  
 1214 aligned with the US OSHA classifications of exposure risks (US OSHA 2020), by  
 1215 benchmarking the dose calculations to a baseline scenario that is considered high risk by US  
 1216 OSHA. We define the baseline scenario to represent a person (i.e., medical worker) who is  
 1217 exposed to a COVID-19 infected person. We apply assumptions to this scenario, addressing  
 1218 each of the factors in **Table S2**, to arrive at a baseline inhalation dose value. The inhalation  
 1219 dose for other scenarios is compared to the baseline dose by a simple ratio. Below is the full  
 1220 ratio equation with the “*i th*” scenario in the numerator and the baseline (BL) in the  
 1221 denominator. We can rearrange the terms in each of the *i* scenario ( $E_{mass i}$ ) and the baseline  
 1222 ( $E_{mass BL}$ ):

$$1223 \quad \frac{D_{Quanta i}}{D_{Quanta BL}} = \frac{\varphi_i}{\varphi_{BL}} \times \frac{\dot{M}_i}{\dot{M}_{BL}} \times \frac{\sum_1^{(Pe_{total}^{-1})}}{\sum_1^{(Pe_{total}^{-1})}} \frac{(FF_{Factor} + NF_{Factor})_i}{(FF_{Factor} + NF_{Factor})_{BL}} \times \frac{(1 - Ef_{out})_i}{(1 - Ef_{out})_{BL}}$$

$$1224 \quad \times \frac{(1 - Ef_{in})_i}{(1 - Ef_{in})_{BL}}$$

$$1225 \quad \times \frac{Q_{inhalation i}}{Q_{inhalation BL}} \times \frac{Pe_{Exposed i}}{Pe_{Exposed BL}} \times \frac{\Delta t_i}{\Delta t_{BL}} \times \frac{Variant_{Adj i}}{Variant_{Adj BL}} \times \frac{Immunity_{Adj i}}{Immunity_{Adj BL}} \times \frac{Test_{Adj i}}{Test_{Adj BL}}$$

1226 *Eq. S46*

### 1227 **Emission Rate Approach**

1228 Deterministic dose-response models provide estimations of the intake dose and estimations  
 1229 of the probability of infection for the intake dose. These models require a means of quantifying  
 1230 the dose and quantifying the pathogen-host interaction via a dose response (i.e., a *tolerance*  
 1231 *dose* – the dose above which someone is certain to be infected or a *threshold dose* – minimum  
 1232 dose needed to initiate a chance of infection in any person) (Sze To and Chao 2010). To  
 1233 calculate risks using a dose-response approach, similar to what was done by Parhizkar, et al.,  
 1234 2021, the following is needed: (1) an explicit mass rate or particle count rate emitted from an



1235 infected person, (2) information on particle size emitted and particle size distribution, and (3)  
1236 the explicit response threshold dose or tolerance dose. Determining these data requires  
1237 environmental measurement and epidemiological studies of transmission. While CEAT is also  
1238 based upon a deterministic dose-response framework, it does not use explicit values for  
1239 emission rate and dose response. Instead it calculates a dose ratio (using Equation S44), based  
1240 upon comparing a baseline scenario that has been defined as high risk to an evaluated scenario  
1241 (i.e.,  $i^{\text{th}}$  scenario). This simplification provides a means to rapidly deploy a comprehensive risk  
1242 model during an infectious disease outbreak ahead of public health and medical authorities  
1243 having detailed data on the explicit viral emission rates and dose responses. The CEAT model  
1244 does, however, require that a public health authority (e.g., Occupational Safety and Health  
1245 Administration (OSHA), Centers of Disease Control and Prevention (CDC), or other  
1246 governmental health department) or other expert defines an exposure and dose scenario that is  
1247 consistent with high risk exposure. In CEAT, we have used the OSHA classifications of  
1248 exposure risks (US OSHA 2020) for this purpose.

1249 While the ratio model does not directly use Wells-Riley approach, it does benefit from the  
1250 data that have been empirically-derived from use of the Wells-Riley approach, allowing us to  
1251 adjust the CEAT dose ratio results and exposure risk results for various activities and  
1252 vocalization intensities. We use the back-calculated quanta per hour from Buonanno, et al.,  
1253 2020a and Buonanno, et al., 2020b to inform the ratio of emission rates,  $\frac{\dot{M}_i}{\dot{M}_{BL}}$ . We make the  
1254 assumption that these empirically-derived ratios would be correlated with explicit mass or  
1255 particle count ratios that would be appropriate for deterministic dose-response models.

1256 It is instructive to note that the CEAT approach does not require a means of varying the  
1257 emission rate ratios. If Wells-Riley-derived emissions for various activities and vocalization  
1258 intensities were not available, the assumption could be made that emission rate was constant  
1259 (i.e.,  $\frac{\dot{M}_i}{\dot{M}_{BL}} = 1$ ). All of the other ratio factors in Eq 46 could still be used to evaluate the  $i^{\text{th}}$  dose  
1260 scenario versus the baseline scenario. The majority cases that the CEAT was employed  
1261 assumed that the Step 5 vocalization intensity was “standing and speaking” which uses in  $\frac{\dot{M}_i}{\dot{M}_{BL}} =$   
1262 1 in the model’s calculations. The fact that Wells-Riley-derived data are not essential to use  
1263 CEAT is a benefit of the CEAT approach.

1264

## 1265 **QUANTIFICATION AND STATISTICAL ANALYSIS**

### 1266 **Gathering Scenario**

1267 To determine the gathering scenario, we considered three different counties for the date of  
1268 1/31/2022 that were in different regions of the US with very low COVID-19 cases  
1269 (Montgomery County, MD), very high COVID-19 cases (Knox County, TN), and a county  
1270 with cases in between the two (Suffolk County, MA). In this analysis, we estimated that a  
1271 typical gathering will last 5 hours and can be held both indoors or outdoors. The indoor scenario  
1272 is considered to take place in a room (i.e. 30ft x 30ft x 9ft or 9.14m x 9.14m x 2.74m). We  
1273 utilized the COVID ActNow tracker (U.S. COVID Risk & Vaccine Tracker) to determine the  
1274 latest number of cases and vaccination rates on 1/31/2022. In addition, we utilized CDC's  
1275 Nationwide Commercial Laboratory Seroprevalence Survey (U.S. COVID Risk & Vaccine  
1276 Tracker) to determine the current population recovered from COVID-19, and CDC's Variant  
1277 Proportions Tracker (U.S. COVID Risk & Vaccine Tracker) to determine the estimated  
1278 percentage of existing SARS-CoV-2 variants that exist in the infected population in each  
1279 region. At the time of analysis for all counties the Omicron variant accounts for >99% of  
1280 COVID-19 cases (U.S. COVID Risk & Vaccine Tracker). It is estimated that the Omicron  
1281 variant is 440% more transmissible than the original SARS-CoV-2 reference strain (Araf et al.  
1282 2022). We analyzed for the following different parameters to account for multiple different  
1283 scenarios that gatherings can take place: distancing ranging from 1.5ft to 10ft, masks usage  
1284 (i.e. no masks, average masks, and N95/KN95 masks), and if the group of people are either  
1285 "following all public health guidance" or "equal to the community average". In addition, we  
1286 also considered testing to be included with one of the scenarios. All data was recorded in  
1287 Microsoft Excel 2019 and all data analyses were completed using R version 4.0.3, RStudio  
1288 version 1.4.1717, and ggplot2 v3.3.5 (Wickham 2016).

1289

### 1290 **NASA Ames Research Center CEAT Tool Usage**

1291 In initial assessments, utilizing CEAT V B.6 that was released on November 25, 2020 Step  
1292 1 ("The group is composed of people who...") was generally selected as "You think are  
1293 following all public health guidance". Step 2 ("Number of People Sharing Activity Space")  
1294 was set to the requested number of personnel required to conduct the operation in-person. In  
1295 general this was 2 to 4 people per location per operation. Selected distance (Step 3) was set to  
1296 6 feet ("-6 distancing adjustment") unless specified otherwise. For Mask Efficacy (Step 4)  
1297 "cloth masks" worn by all personnel were selected as cloth was the most likely utilized (-5 and

1298 -3, respectively). Very few projects were using surgical masks and masks were required to be  
1299 worn by everyone on campus at this time. Vocalization (Step 5) and breathing (Step 6)  
1300 adjustment rates, as well as Duration of Activity (Step 7) were based on the operations reported  
1301 in the RTOW plan submission. Typical operations are conducted while “standing”, “speaking”,  
1302 and “passive” (0 and 0) for 8 hours. Ventilation rates (Step 8) and Adjustment for room sizes  
1303 (Step 9) were based on location of the operation reported in the RTOW plan submission. Step  
1304 10 (“Calculate Adjustment to Local Community’s Current Conditions”) was based on the State  
1305 of California (US State of California 2022a). The California case rate was chosen instead of  
1306 the local county case rate as the majority of the NASA ARC workforce resides in the general  
1307 Bay Area which encompasses nine counties, some of which have weekly case rates more  
1308 similar to California than to the local county. After inputting these desired values for the  
1309 variables in Steps 1-10, the relative exposure ratio for a given condition was recorded and  
1310 analyzed in Microsoft Excel 365.

1311 CEAT V B.14 was released on December 13, 2020 the inputs were similar to that of V B.6,  
1312 the difference being that for Step 9 actual room dimensions could be entered.

1313 CEAT V B.29 was released on May 6, 2021 Step 1 (“The group is composed of people  
1314 who...”) was selected as “Are following all public health guidance”. However, since the  
1315 percent vaccination rate was unknown, it was not checked. Step 2 (“Number of People Sharing  
1316 Activity Space”) was set to the requested number of personnel required to conduct the operation  
1317 in-person. In general this was 2 to 4 people per location per operation. Selected distance (Step  
1318 3) was set to 6 feet unless specified otherwise. For “Mask Type and Prevalence” (Step 4) “cloth  
1319 masks” worn by all personnel were selected as cloth was the most likely utilized. Very few  
1320 projects were using surgical masks and masks were required to be worn by everyone on campus  
1321 for all but a 6 week window where masks were optional for vaccinated personnel. Vocalization  
1322 (Step 5) and breathing (Step 6) adjustment rates, as well as Duration of Activity (Step 7) were  
1323 based on the operations reported in the RTOW plan submission. Typical operations are  
1324 conducted while “standing”, “speaking”, and “passive” for 8 hours. Ventilation rates (Step 8)  
1325 and Adjustment for room sizes (Step 9) were based on location of the operation reported in the  
1326 RTOW plan submission. Step 10 (“Calculate Adjustment to Local Community’s Current  
1327 Conditions”) was based on the State of California (US State of California 2022a), (US State of  
1328 California 2022b) and variant information was input from CDC data (CDC 2020c). When  
1329 variant prevalence was introduced into the CEAT in later iterations, the three most prevalent  
1330 variants in Health and Human Services (HHS) Region 9 were used (CDC 2020c). Specifically,  
1331 the variant prevalence data from Nowcast was utilized. Instead of utilizing the predetermined

1332 variants provided in the CEAT, NASA ARC input data from the three most prevalent variants  
1333 in the HHS Region 9. The “Protection Effectiveness of Immunity (%)” in Step 10 was set to  
1334 66% based on published research regarding the Pfizer-BioNTech, Moderna, and Janssen  
1335 vaccine against the Delta variant (Fowlkes 2021). After inputting these desired values for the  
1336 variables in Steps 1-10, the relative exposure ratio for a given condition was recorded and  
1337 analyzed in Microsoft Excel 365. Although CEAT V B.32 was released on August 29, 2021 it  
1338 was not used in this analysis. To generate a graphical representation of the data (**Fig. 4**) we  
1339 associated numerical values to the different parameters in the table and utilized R version 4.03,  
1340 RStudio version 1.4.1717 with the following R packages: ggplot2 v3.3.5 (Wickham 2016).

1341 For the longitudinal review of the NASA ARC “Centerwide Accepted Median Exposure  
1342 Risk Ratio” in relation to the community case rates CEAT V B.6, V B.14, and V B.29 were  
1343 utilized, this was dependent on the newest version available. Initial inputs at the time of the  
1344 RTOW plan were utilized and Step 10 (“Calculate Adjustment to Local Community’s Current  
1345 Conditions”) rates were updated on a biweekly basis based on the State of California (US State  
1346 of California 2022a). The median of all project exposure risk ratios was used instead of the  
1347 average to account for the high fluctuations in exposure risk ratios. Hypothetical exposure risk  
1348 ratios were back-calculated to March 2020. Only projects that had been approved to RTOW,  
1349 along with projects that were deemed mission essential and were exempt from the work from  
1350 home policy (e.g. Security Guards, Security Operations Center) were included in the calculated  
1351 biweekly median risk ratio. The relative exposure ratio for a given condition was recorded, the  
1352 median exposure ratio was calculated biweekly, and the correlation coefficient compared to the  
1353 community case rates was calculated in Microsoft Excel 365. The median of all project  
1354 exposure risk ratios was used instead of the average to account for the high fluctuations.  
1355 Although the CEAT was not used at NASA ARC until December 2020, hypothetical exposure  
1356 risk ratios were back-calculated to March 2020, when NASA ARC enacted their mandatory  
1357 work from home policy, for each project using the known historic California case rates. Only  
1358 projects that had been approved to RTOW, along with projects that were deemed mission  
1359 essential and were exempt from the work from home policy (e.g. Security Guards, Security  
1360 Operations Center) were included in the calculated biweekly median exposure risk ratio. A plot  
1361 was generated for this data (**Fig. 5**) using R version 4.0.3, RStudio version 1.4.1717 with the  
1362 following R packages: ggplot2 v3.3.5 (Wickham 2016).

1363

1364

1365

1366 **References**

- 1367 Acevedo-Bolton V, Cheng K-C, Jiang R-T, Ott WR, Klepeis NE, Hildemann LM. 2012.  
1368 Measurement of the proximity effect for indoor air pollutant sources in two homes. *J.*  
1369 *Environ. Monit.* 14:94–104.
- 1370 Adenaiye OO, Lai J, Mesquita PJB de, Hong F, Youssefi S, German J, Tai S-HS, Albert B,  
1371 Schanz M, Weston S, et al. Infectious SARS-CoV-2 in Exhaled Aerosols and Efficacy  
1372 of Masks During Early Mild Infection. *Clin. Infect. Dis. Off. Publ. Infect. Dis. Soc.*  
1373 *Am.* [Internet]. Available from:  
1374 <https://www.ncbi.nlm.nih.gov/labs/pmc/articles/PMC8522431/>
- 1375 Anthony TR. 2009. Computational Fluid Dynamics Modeling. In: *Mathematical Models for*  
1376 *Estimating Occupational Exposure to Chemicals*. 2nd ed. Fairfax, Virginia: American  
1377 Industrial Hygiene Association. p. 137–150.
- 1378 Araf Y, Akter F, Tang Y-D, Fatemi R, Parvez MSA, Zheng C, Hossain MG. 2022. Omicron  
1379 variant of SARS-CoV-2: Genomics, transmissibility, and responses to current  
1380 COVID-19 vaccines. *J. Med. Virol.*
- 1381 Atrubin D. 2020. An Outbreak of COVID-19 Associated with a Recreational Hockey Game  
1382 — Florida, June 2020. *MMWR Morb. Mortal. Wkly. Rep.* [Internet] 69. Available  
1383 from: <https://www.cdc.gov/mmwr/volumes/69/wr/mm6941a4.htm>
- 1384 Bahl R, Eikmeier N, Fraser A, Junge M, Keesing F, Nakahata K, Reeves L. 2021. Modeling  
1385 COVID-19 spread in small colleges. *PloS One* 16:e0255654.
- 1386 Baldwin PEJ, Maynard AD. 1998. A survey of wind speeds in indoor workplaces. *Ann. Work*  
1387 *Expo. Health* 42:303–313.
- 1388 Bargain O, Aminjonov U. 2020. Trust and compliance to public health policies in times of  
1389 COVID-19. *J. Public Econ.* 192:104316.
- 1390 Bazant MZ, Bush JWM. 2021. A guideline to limit indoor airborne transmission of COVID-  
1391 19. *Proc. Natl. Acad. Sci.* [Internet] 118. Available from:  
1392 <https://www.pnas.org/content/118/17/e2018995118>
- 1393 Biryukov J, Boydston JA, Dunning RA, Yeager JJ, Wood S, Reese AL, Ferris A, Miller D,  
1394 Weaver W, Zeitouni NE, et al. 2020. Increasing Temperature and Relative Humidity  
1395 Accelerates Inactivation of SARS-CoV-2 on Surfaces. *mSphere* [Internet] 5.  
1396 Available from: <https://www.ncbi.nlm.nih.gov/labs/pmc/articles/PMC7333574/>
- 1397 Brlek A, Vidovič Š, Vuzem S, Turk K, Simonović Z. 2020. Possible indirect transmission of  
1398 COVID-19 at a squash court, Slovenia, March 2020: case report. *Epidemiol. Infect.*

- 1399 148:e120.
- 1400 Brooks JT, Butler JC. 2021. Effectiveness of Mask Wearing to Control Community Spread of  
1401 SARS-CoV-2. *JAMA* 325:998–999.
- 1402 Brooks-Pollock E, Christensen H, Trickey A, Hemani G, Nixon E, Thomas AC, Turner K,  
1403 Finn A, Hickman M, Relton C, et al. 2021. High COVID-19 transmission potential  
1404 associated with re-opening universities can be mitigated with layered interventions.  
1405 *Nat. Commun.* [Internet] 12. Available from:  
1406 <https://www.ncbi.nlm.nih.gov/labs/pmc/articles/PMC8371131/>
- 1407 CDC. 2003. Guidelines for Environmental Infection Control in Health-Care Facilities.  
1408 Available from:  
1409 <https://www.cdc.gov/infectioncontrol/guidelines/environmental/appendix/air.html>
- 1410 CDC. 2020a. COVID Data Tracker: COVID-19 Integrated County View. *Cent. Dis. Control*  
1411 *Prev.* [Internet]. Available from: [https://covid.cdc.gov/covid-data-tracker/#county-](https://covid.cdc.gov/covid-data-tracker/#county-view?list_select_state=all_states&list_select_county=all_counties&data-type=Cases&metric-cases=cases_per_100K_7_day_count_change)  
1412 [view?list\\_select\\_state=all\\_states&list\\_select\\_county=all\\_counties&data-](https://covid.cdc.gov/covid-data-tracker/#county-view?list_select_state=all_states&list_select_county=all_counties&data-type=Cases&metric-cases=cases_per_100K_7_day_count_change)  
1413 [type=Cases&metric-cases=cases\\_per\\_100K\\_7\\_day\\_count\\_change](https://covid.cdc.gov/covid-data-tracker/#county-view?list_select_state=all_states&list_select_county=all_counties&data-type=Cases&metric-cases=cases_per_100K_7_day_count_change)
- 1414 CDC. 2020b. Scientific Brief: SARS-CoV-2 Transmission. *Cent. Dis. Control Prev.*  
1415 [Internet]. Available from: [https://www.cdc.gov/coronavirus/2019-](https://www.cdc.gov/coronavirus/2019-ncov/science/science-briefs/sars-cov-2-transmission.html)  
1416 [ncov/science/science-briefs/sars-cov-2-transmission.html](https://www.cdc.gov/coronavirus/2019-ncov/science/science-briefs/sars-cov-2-transmission.html)
- 1417 CDC. 2020c. COVID Data Tracker: Variant Proportions. *Cent. Dis. Control Prev.* [Internet].  
1418 Available from: <https://covid.cdc.gov/covid-data-tracker/#variant-proportions>
- 1419 CDC. 2022. COVID Data Tracker. *Cent. Dis. Control Prev.* [Internet]. Available from:  
1420 <https://covid.cdc.gov/covid-data-tracker>
- 1421 CDC, 2021 August 24. Community, Work, and School. *Cent. Dis. Control Prev.* [Internet].  
1422 Available from: <https://www.cdc.gov/coronavirus/2019-ncov/community/index.html>
- 1423 CDC, 2021 July 2. Public Health Guidance for Potential COVID-19 Exposure Associated  
1424 with Travel. *Cent. Dis. Control Prev.* [Internet]. Available from:  
1425 <https://www.cdc.gov/coronavirus/2019-ncov/php/risk-assessment.html>
- 1426 CDC, 2021 March 1. 2022. Quarantine & Isolation. *Cent. Dis. Control Prev.* [Internet].  
1427 Available from: [https://www.cdc.gov/coronavirus/2019-ncov/your-health/quarantine-](https://www.cdc.gov/coronavirus/2019-ncov/your-health/quarantine-isolation.html)  
1428 [isolation.html](https://www.cdc.gov/coronavirus/2019-ncov/your-health/quarantine-isolation.html)
- 1429 CDC, 2021 September 10. Interim Guidance for Managing Healthcare Personnel with SARS-  
1430 CoV-2 Infection or Exposure to SARS-CoV-2. *Cent. Dis. Control Prev.* [Internet].  
1431 Available from: [https://www.cdc.gov/coronavirus/2019-ncov/hcp/guidance-risk-](https://www.cdc.gov/coronavirus/2019-ncov/hcp/guidance-risk-assesment-hcp.html)  
1432 [assesment-hcp.html](https://www.cdc.gov/coronavirus/2019-ncov/hcp/guidance-risk-assesment-hcp.html)



- 1433 Chande A, Gussler W, Harris M, Lee S, Rishishwar L, Hilley T, Jordan IK, Andris CM,  
1434 Weitz JS. 2020. COVID-19 Event Risk Assessment Planning Tool. Available from:  
1435 <https://covid19risk.biosci.gatech.edu/>
- 1436 Chande A, Lee S, Harris M, Nguyen Q, Beckett SJ, Hilley T, Andris C, Weitz JS. 2020. Real-  
1437 time, interactive website for US-county-level COVID-19 event risk assessment. *Nat.*  
1438 *Hum. Behav.* 4:1313–1319.
- 1439 Chen PZ, Bobrovitz N, Premji Z, Koopmans M, Fisman DN, Gu FX. 2021. Heterogeneity in  
1440 transmissibility and shedding SARS-CoV-2 via droplets and aerosols. *eLife*  
1441 10:e65774.
- 1442 Cheng K-C, Acevedo-Bolton V, Jiang R-T, Klepeis NE, Ott WR, Fringer OB, Hildemann  
1443 LM. 2011. Modeling Exposure Close to Air Pollution Sources in Naturally Ventilated  
1444 Residences: Association of Turbulent Diffusion Coefficient with Air Change Rate.  
1445 *Environ. Sci. Technol.* 45:4016–4022.
- 1446 Cheng K-C, Acevedo-Bolton V, Jiang R-T, Klepeis NE, Ott WR, Kitanidis PK, Hildemann  
1447 LM. 2014. Stochastic modeling of short-term exposure close to an air pollution source  
1448 in a naturally ventilated room: An autocorrelated random walk method. *J. Expo. Sci.*  
1449 *Environ. Epidemiol.* 24:311–318.
- 1450 CIRES. 2020. COVID-19 Airborne Transmission Tool Available. *CIRES* [Internet].  
1451 Available from: [https://cires.colorado.edu/news/covid-19-airborne-transmission-tool-](https://cires.colorado.edu/news/covid-19-airborne-transmission-tool-available)  
1452 [available](https://cires.colorado.edu/news/covid-19-airborne-transmission-tool-available)
- 1453 Coleman KK, Tay DJW, Tan KS, Ong SWX, Son TT, Koh MH, Chin YQ, Nasir H, Mak  
1454 TM, Chu JJH, et al. Viral Load of SARS-CoV-2 in Respiratory Aerosols Emitted by  
1455 COVID-19 Patients while Breathing, Talking, and Singing. *Clin. Infect. Dis. Off.*  
1456 *Publ. Infect. Dis. Soc. Am.* [Internet]. Available from:  
1457 <https://www.ncbi.nlm.nih.gov/labs/pmc/articles/PMC8436389/>
- 1458 Deckert A, Anders S, Allegri M de, Nguyen HT, Souares A, McMahon S, Boerner K, Meurer  
1459 M, Herbst K, Sand M, et al. 2021. Effectiveness and cost-effectiveness of four  
1460 different strategies for SARS-CoV-2 surveillance in the general population (CoV-  
1461 Surv Study): a structured summary of a study protocol for a cluster-randomised, two-  
1462 factorial controlled trial. *Trials* [Internet] 22. Available from:  
1463 <https://www.ncbi.nlm.nih.gov/labs/pmc/articles/PMC7791150/>
- 1464 Din RU, Shah K, Ahmad I, Abdeljawad T. 2020. Study of transmission dynamics of novel  
1465 COVID-19 by using mathematical model. *Adv. Differ. Equ.* [Internet] 2020. Available  
1466 from: <https://www.ncbi.nlm.nih.gov/labs/pmc/articles/PMC7327217/>

- 1467 Dols W, Polidoro B. 2015. CONTAM User Guide and Program Documentation Version 3.2.
- 1468 Dols WS, Polidoro BJ, Poppendieck D, Emmerich SJ. 2020. A tool to model the Fate and  
1469 Transport of Indoor Microbiological Aerosols (FaTIMA). Gaithersburg, MD:  
1470 National Institute of Standards and Technology Available from:  
1471 <https://nvlpubs.nist.gov/nistpubs/TechnicalNotes/NIST.TN.2095.pdf>
- 1472 Doyle K, Teran RA, Reefhuis J, Kerins JL, Qiu X, Green SJ, Choi H, Madni SA, Kamal N,  
1473 Landon E, et al. 2021. Multiple Variants of SARS-CoV-2 in a University Outbreak  
1474 After Spring Break — Chicago, Illinois, March–May 2021. *Morb. Mortal. Wkly. Rep.*  
1475 70:1195.
- 1476 Fabregat A, Gisbert F, Vernet A, Dutta S, Mittal K, Pallarès J. 2021. Direct numerical  
1477 simulation of the turbulent flow generated during a violent expiratory event. *Phys.*  
1478 *Fluids* [Internet] 33. Available from:  
1479 <https://www.ncbi.nlm.nih.gov/labs/pmc/articles/PMC7976052/>
- 1480 Fabregat A, Gisbert F, Vernet A, Ferré JA, Mittal K, Dutta S, Pallarès J. 2021. Direct  
1481 numerical simulation of turbulent dispersion of evaporative aerosol clouds produced  
1482 by an intense expiratory event. *Phys. Fluids* 33:033329.
- 1483 Feyman Y, Bor J, Raifman J, Griffith KN. 2020. Effectiveness of COVID-19 shelter-in-place  
1484 orders varied by state. *PLoS ONE* [Internet] 15. Available from:  
1485 <https://www.ncbi.nlm.nih.gov/labs/pmc/articles/PMC7775080/>
- 1486 Foat T, Drodge J, Nally J, Parker S. 2020. A relationship for the diffusion coefficient in eddy  
1487 diffusion based indoor dispersion modelling. *Build. Environ.* 169:106591.
- 1488 Fowlkes A. 2021. Effectiveness of COVID-19 Vaccines in Preventing SARS-CoV-2  
1489 Infection Among Frontline Workers Before and During B.1.617.2 (Delta) Variant  
1490 Predominance — Eight U.S. Locations, December 2020–August 2021. *MMWR Morb.*  
1491 *Mortal. Wkly. Rep.* [Internet] 70. Available from:  
1492 <https://www.cdc.gov/mmwr/volumes/70/wr/mm7034e4.htm>
- 1493 Hamner L. 2020. High SARS-CoV-2 Attack Rate Following Exposure at a Choir Practice —  
1494 Skagit County, Washington, March 2020. *MMWR Morb. Mortal. Wkly. Rep.*  
1495 [Internet] 69. Available from:  
1496 <https://www.cdc.gov/mmwr/volumes/69/wr/mm6919e6.htm>
- 1497 Harvard IQSS. 2020. CovidU. Available from: <https://harvard-covid-model.herokuapp.com/>
- 1498 Hernández-Hernández AM, Huerta-Quintanilla R. 2021. Managing school interaction  
1499 networks during the COVID-19 pandemic: Agent-based modeling for evaluating  
1500 possible scenarios when students go back to classrooms. *PLoS ONE* [Internet] 16.

- 1501 Available from: <https://www.ncbi.nlm.nih.gov/labs/pmc/articles/PMC8372954/>
- 1502 Heydari ST, Zarei L, Sadati AK, Moradi N, Akbari M, Mehralian G, Lankarani KB. 2021.
- 1503 The effect of risk communication on preventive and protective Behaviours during the
- 1504 COVID-19 outbreak: mediating role of risk perception. *BMC Public Health* [Internet]
- 1505 21. Available from: <https://www.ncbi.nlm.nih.gov/labs/pmc/articles/PMC7787415/>
- 1506 Hijnen D, Marzano AV, Eyerich K, GeurtsvanKessel C, Giménez-Arnau AM, Joly P,
- 1507 Vestergaard C, Sticherling M, Schmidt E. 2020. SARS-CoV-2 Transmission from
- 1508 Presymptomatic Meeting Attendee, Germany. *Emerg. Infect. Dis.* 26:1935–1937.
- 1509 Howard J, Huang A, Li Z, Tufekci Z, Zdimal V, Westhuizen H-M van der, Delft A von, Price
- 1510 A, Fridman L, Tang L-H, et al. 2021. An evidence review of face masks against
- 1511 COVID-19. *Proc. Natl. Acad. Sci.* [Internet] 118. Available from:
- 1512 <https://www.pnas.org/content/118/4/e2014564118>
- 1513 Illingworth V. 1991. The Penguin dictionary of physics. London: Penguin Books
- 1514 Jang S, Han SH, Rhee J-Y. 2020. Cluster of Coronavirus Disease Associated with Fitness
- 1515 Dance Classes, South Korea. *Emerg. Infect. Dis.* 26:1917.
- 1516 Jayaweera M, Perera H, Gunawardana B, Manatunge J. 2020. Transmission of COVID-19
- 1517 virus by droplets and aerosols: A critical review on the unresolved dichotomy.
- 1518 *Environ. Res.* 188:109819.
- 1519 Keskinocak P, Oruc BE, Baxter A, Asplund J, Serban N. 2020. The impact of social
- 1520 distancing on COVID19 spread: State of Georgia case study. *PLoS ONE* [Internet] 15.
- 1521 Available from: <https://www.ncbi.nlm.nih.gov/labs/pmc/articles/PMC7549801/>
- 1522 Khan K, Bush JWM, Bazant MZ. 2021. COVID-19 Indoor Safety Guideline. Available from:
- 1523 <https://indoor-covid-safety.herokuapp.com/>
- 1524 Khanh NC, Thai PQ, Quach H-L, Thi N-AH, Dinh PC, Duong TN, Mai LTQ, Nghia ND, Tu
- 1525 TA, Quang LN, et al. 2020. Transmission of SARS-CoV 2 During Long-Haul Flight.
- 1526 *Emerg. Infect. Dis.* 26:2617.
- 1527 Khoury DS, Cromer D, Reynaldi A, Schlub TE, Wheatley AK, Juno JA, Subbarao K, Kent
- 1528 SJ, Triccas JA, Davenport MP. 2021. Neutralizing antibody levels are highly
- 1529 predictive of immune protection from symptomatic SARS-CoV-2 infection. *Nat. Med.*
- 1530 27:1205–1211.
- 1531 Kwon KS, Park JI, Park YJ, Jung DM, Ryu KW, Lee JH. 2020. Evidence of Long-Distance
- 1532 Droplet Transmission of SARS-CoV-2 by Direct Air Flow in a Restaurant in Korea.
- 1533 *J. Korean Med. Sci.* 35:e415.
- 1534 Levine-Tiefenbrun M, Yelin I, Katz R, Herzel E, Golan Z, Schreiber L, Wolf T, Nadler V,

- 1535 Ben-Tov A, Kuint J, et al. 2021. Initial report of decreased SARS-CoV-2 viral load  
1536 after inoculation with the BNT162b2 vaccine. *Nat. Med.* [Internet]. Available from:  
1537 <http://www.nature.com/articles/s41591-021-01316-7>
- 1538 Li R, Pei S, Chen B, Song Y, Zhang T, Yang W, Shaman J. 2020. Substantial undocumented  
1539 infection facilitates the rapid dissemination of novel coronavirus (SARS-CoV-2).  
1540 *Science* 368:489–493.
- 1541 Li X, Lester D, Rosengarten G, Aboltins C, Patel M, Cole I. 2022. A spatiotemporally  
1542 resolved infection risk model for airborne transmission of COVID-19 variants in  
1543 indoor spaces. *Sci. Total Environ.* 812:152592.
- 1544 Li Y, Leung GM, Tang JW, Yang X, Chao CYH, Lin JZ, Lu JW, Nielsen PV, Niu J, Qian H,  
1545 et al. 2007. Role of ventilation in airborne transmission of infectious agents in the  
1546 built environment - a multidisciplinary systematic review. *Indoor Air* 17:2–18.
- 1547 Marot S, Malet I, Leducq V, Zafilaza K, Sterlin D, Planas D, Gothland A, Jary A, Dorgham  
1548 K, Bruel T, et al. 2021. Rapid decline of neutralizing antibodies against SARS-CoV-2  
1549 among infected healthcare workers. *Nat. Commun.* [Internet] 12. Available from:  
1550 <https://www.ncbi.nlm.nih.gov/labs/pmc/articles/PMC7870823/>
- 1551 Miller GF, Greening B, Rice KL, Arifkhanova A, Meltzer MI, Coronado F. 2022. Modeling  
1552 the Transmission of COVID-19: Impact of Mitigation Strategies in Prekindergarten-  
1553 Grade 12 Public Schools, United States, 2021. *J. Public Health Manag. Pract.*  
1554 *JPHMP* 28:25–35.
- 1555 Miller SL, Nazaroff WW, Jimenez JL, Boerstra A, Buonanno G, Dancer SJ, Kurnitski J, Marr  
1556 LC, Morawska L, Noakes C. 2021. Transmission of SARS-CoV-2 by inhalation of  
1557 respiratory aerosol in the Skagit Valley Chorale superspreading event. *Indoor Air*  
1558 31:314–323.
- 1559 Mutambudzi M, Niedwiedz C, Macdonald EB, Leyland A, Mair F, Anderson J, Celis-  
1560 Morales C, Cleland J, Forbes J, Gill J, et al. 2020. Occupation and risk of severe  
1561 COVID-19: prospective cohort study of 120 075 UK Biobank participants. *Occup.*  
1562 *Environ. Med.*:oemed-2020-106731.
- 1563 Ng OT, Marimuthu K, Koh V, Pang J, Linn KZ, Sun J, Wang LD, Chia WN, Tiu C, Chan M,  
1564 et al. 2021. SARS-CoV-2 seroprevalence and transmission risk factors among high-  
1565 risk close contacts: a retrospective cohort study. *Lancet Infect. Dis.* 21:333–343.
- 1566 Nicas M. 2009a. The Near Field/Far Field (Two Box) Model with a Constant Contaminant  
1567 Emission Rate. In: *Mathematical Models for Estimating Occupational Exposure to*  
1568 *Chemicals*. 2nd ed. Fairfax, Virginia: American Industrial Hygiene Association. p.

- 1569 47–52.
- 1570 Nicas M. 2009b. Turbulent Eddy Diffusion Models. In: *Mathematical Models for Estimating*  
1571 *Occupational Exposure to Chemicals*. 2nd ed. Fairfax, Virginia: American Industrial  
1572 Hygiene Association. p. 53–65.
- 1573 Nicas M. 2014. Estimating Exposure for On-Site Worker Health Risk Estimates. Available  
1574 from: [https://www.aqmd.gov/home/rules-compliance/compliance/vocs/exempts/toxic-](https://www.aqmd.gov/home/rules-compliance/compliance/vocs/exempts/toxic-symp)  
1575 [symp](https://www.aqmd.gov/home/rules-compliance/compliance/vocs/exempts/toxic-symp)
- 1576 Nicas M. 2016. The near field/far field model with constant application of chemical mass and  
1577 exponentially decreasing emission of the mass applied. *J. Occup. Environ. Hyg.*  
1578 13:519–528.
- 1579 Nicas M, Plisko MJ, Spencer JW. 2007. Estimating Benzene Exposure at a Solvent Parts  
1580 Washer. *J. Occup. Environ. Hyg.* [Internet]. Available from:  
1581 <https://www.tandfonline.com/doi/abs/10.1080/15459620600637390>
- 1582 NIPH. 2021. Preliminary findings from study after Christmas party in Oslo. *Nor. Inst. Public*  
1583 *Health* [Internet]. Available from: [https://www.fhi.no/en/news/2021/preliminary-](https://www.fhi.no/en/news/2021/preliminary-findings-from-outbreak-investigation-after-christmas-party-in-o/)  
1584 [findings-from-outbreak-investigation-after-christmas-party-in-o/](https://www.fhi.no/en/news/2021/preliminary-findings-from-outbreak-investigation-after-christmas-party-in-o/)
- 1585 Parhizkar H, Van Den Wymelenberg KG, Haas CN, Corsi RL. 2021. A Quantitative Risk  
1586 Estimation Platform for Indoor Aerosol Transmission of COVID-19. *Risk Anal. Off.*  
1587 *Publ. Soc. Risk Anal.*
- 1588 Park SY, Kim Y-M, Yi S, Lee S, Na B-J, Kim CB, Kim J-I, Kim HS, Kim YB, Park Y, et al.  
1589 2020. Coronavirus Disease Outbreak in Call Center, South Korea. *Emerg. Infect. Dis.*  
1590 26:1666–1670.
- 1591 Phillips B, Browne DT, Anand M, Bauch CT. 2021. Model-based projections for COVID-19  
1592 outbreak size and student-days lost to closure in Ontario childcare centres and primary  
1593 schools. *Sci. Rep.* [Internet] 11. Available from:  
1594 <https://www.ncbi.nlm.nih.gov/labs/pmc/articles/PMC7973423/>
- 1595 Qian H, Miao T, Liu L, Zheng X, Luo D, Li Y. 2021. Indoor transmission of SARS-CoV-2.  
1596 *Indoor Air* 31:639–645.
- 1597 Ratnesar-Shumate S, Williams G, Green B, Krause M, Holland B, Wood S, Bohannon J,  
1598 Boydston J, Freeburger D, Hooper I, et al. 2020. Simulated Sunlight Rapidly  
1599 Inactivates SARS-CoV-2 on Surfaces. *J. Infect. Dis.* 222:214.
- 1600 Reinke PH, Keil CB. 2009. Well-Mixed Box Model. In: *Mathematical Models for Estimating*  
1601 *Occupational Exposure to Chemicals*. 2nd ed. Fairfax, Virginia: American Industrial  
1602 Hygiene Association. p. 23–31.



- 1603 Riley EC, Murphy G, Riley RL. 1978. Airborne spread of measles in a suburban elementary  
1604 school. *Am. J. Epidemiol.* 107:421–432.
- 1605 Rudnick SN, Milton DK. 2003. Risk of indoor airborne infection transmission estimated from  
1606 carbon dioxide concentration. *Indoor Air* 13:237–245.
- 1607 Safe Air Spaces. 2022. Safe Air Spaces Estimator. *Safeairspace* [Internet]. Available from:  
1608 <https://safeairspace.com/safeairspace-estimator>
- 1609 Shen Y, Li C, Dong H, Wang Z, Martinez L, Sun Z, Handel A, Chen Z, Chen E, Ebell MH, et  
1610 al. 2020. Community Outbreak Investigation of SARS-CoV-2 Transmission Among  
1611 Bus Riders in Eastern China. *JAMA Intern. Med.* 180:1665–1671.
- 1612 Stockie JM. 2011. The Mathematics of Atmospheric Dispersion Modeling. *SIAM Rev.*  
1613 53:349–372.
- 1614 Sun Z, Di L, Sprigg W, Tong D, Casal M. 2020. Community venue exposure risk estimator  
1615 for the COVID-19 pandemic. *Health Place* 66:102450.
- 1616 Sze To GN, Chao CYH. 2010. Review and comparison between the Wells–Riley and dose-  
1617 response approaches to risk assessment of infectious respiratory diseases. *Indoor Air*  
1618 20:2–16.
- 1619 Teran RA, Ghinai I, Gretsch S, Cable T, Black SR, Green SJ, Perez O, Chlipala GE,  
1620 Maienschein-Cline M, Kunstman KJ, et al. 2020. COVID-19 Outbreak Among a  
1621 University’s Men’s and Women’s Soccer Teams - Chicago, Illinois, July-August  
1622 2020. *MMWR Morb. Mortal. Wkly. Rep.* 69:1591–1594.
- 1623 The White House. 2021. Executive Order on Requiring Coronavirus Disease 2019  
1624 Vaccination for Federal Employees. *White House* [Internet]. Available from:  
1625 [https://www.whitehouse.gov/briefing-room/presidential-](https://www.whitehouse.gov/briefing-room/presidential-actions/2021/09/09/executive-order-on-requiring-coronavirus-disease-2019-vaccination-for-federal-employees/)  
1626 [actions/2021/09/09/executive-order-on-requiring-coronavirus-disease-2019-](https://www.whitehouse.gov/briefing-room/presidential-actions/2021/09/09/executive-order-on-requiring-coronavirus-disease-2019-vaccination-for-federal-employees/)  
1627 [vaccination-for-federal-employees/](https://www.whitehouse.gov/briefing-room/presidential-actions/2021/09/09/executive-order-on-requiring-coronavirus-disease-2019-vaccination-for-federal-employees/)
- 1628 U.S. COVID Risk & Vaccine Tracker. U.S. COVID Risk & Vaccine Tracker. *Covid Act Now*  
1629 [Internet]. Available from: <https://covidactnow.org>
- 1630 US DHS. 2022. Estimated Airborne Decay of SARS-CoV-2 | Homeland Security. Available  
1631 from: <https://www.dhs.gov/science-and-technology/sars-airborne-calculator>
- 1632 US EPA O. 2019. Guidelines for Human Exposure Assessment. Available from:  
1633 <https://www.epa.gov/risk/guidelines-human-exposure-assessment>
- 1634 US OSHA. 2020. Guidance on Preparing Workplaces for COVID-19. Available from:  
1635 <https://www.osha.gov/sites/default/files/publications/osha3990.pdf>
- 1636 US State of California. 2022a. Tracking COVID-19 in California. Available from:



- 1637 <https://covid19.ca.gov/state-dashboard/>
- 1638 US State of California. 2022b. Tracking COVID-19 in California: Vaccination data.
- 1639 Available from: <https://covid19.ca.gov/vaccination-progress-data/>
- 1640 Venkatram A, Weil J. 2021. Modeling turbulent transport of aerosols inside rooms using
- 1641 eddy diffusivity. *Indoor Air* [Internet] n/a. Available from:
- 1642 <https://onlinelibrary.wiley.com/doi/abs/10.1111/ina.12901>
- 1643 Vernez D, Schwarz S, Sauvain J-J, Petignat C, Suarez G. 2021. Probable aerosol transmission
- 1644 of SARS-CoV-2 in a poorly ventilated courtroom. *Indoor Air* [Internet]. Available
- 1645 from: <https://onlinelibrary.wiley.com/doi/abs/10.1111/ina.12866>
- 1646 Wagner J, Sparks TL, Miller S, Chen W, Macher JM, Waldman JM. 2021. Modeling the
- 1647 impacts of physical distancing and other exposure determinants on aerosol
- 1648 transmission. *J. Occup. Environ. Hyg.* 18:495–509.
- 1649 Wang Y, Deng Z, Shi D. 2021. How effective is a mask in preventing COVID-19 infection?
- 1650 *Med. Devices Sens.:*e10163.
- 1651 Wells CR, Townsend JP, Pandey A, Moghadas SM, Krieger G, Singer B, McDonald RH,
- 1652 Fitzpatrick MC, Galvani AP. 2021. Optimal COVID-19 quarantine and testing
- 1653 strategies. *Nat. Commun.* [Internet] 12. Available from:
- 1654 <https://www.ncbi.nlm.nih.gov/labs/pmc/articles/PMC7788536/>
- 1655 Whaley CM, Cantor J, Pera M, Jena AB. 2021. Assessing the Association Between Social
- 1656 Gatherings and COVID-19 Risk Using Birthdays. *JAMA Intern. Med.* 181:1090–
- 1657 1099.
- 1658 Wickham H. 2016. *ggplot2: Elegant Graphics for Data Analysis*. Springer-Verlag New York
- 1659 Available from: <https://ggplot2.tidyverse.org>
- 1660 Yamayoshi S, Yasuhara A, Ito M, Akasaka O, Nakamura M, Nakachi I, Koga M, Mitamura
- 1661 K, Yagi K, Maeda K, et al. 2021. Antibody titers against SARS-CoV-2 decline, but do
- 1662 not disappear for several months. *EClinicalMedicine* [Internet] 32. Available from:
- 1663 <https://www.ncbi.nlm.nih.gov/labs/pmc/articles/PMC7877219/>
- 1664 Zannetti P. 1990. *Air Pollution Modeling: Theories, Computational Methods and Available*
- 1665 *Software*. Springer, Boston, MA
- 1666 Zhang Y, Banerjee S, Yang R, Lungu C, Ramachandran G. 2009. Bayesian Modeling of
- 1667 Exposure and Airflow Using Two-Zone Models. *Ann. Occup. Hyg.* 53:409–424.
- 1668

**SARS-CoV-2 transmits person-to-person when an infected person sheds the virus.**

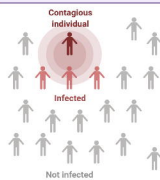

Determine risk exposure to COVID-19 with COVID-19 Exposure Assessment Tool (CEAT)

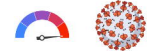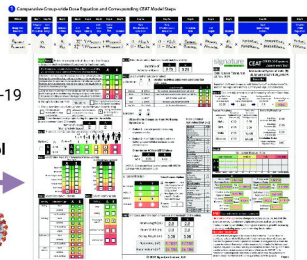

**CEAT model was demonstrated to be accurate predicting infection rates for known transmission events.**

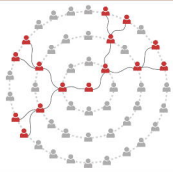

**Example of how to use CEAT to properly determine lowest risk to COVID-19 exposure for gatherings**

Parameters to adjust in CEAT

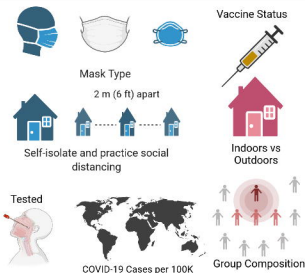

Results from CEAT can determine optimal safest gathering

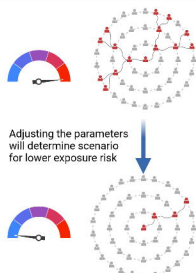

**CEAT Model outperformed the current transmission model used to determine SARS-CoV-2 exposure risk (i.e. Wells-Riley Model)**

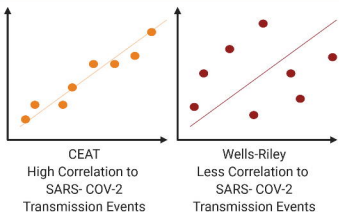

**Real time usage of CEAT to manage potential risk posed by SARS-CoV-2 exposures: Usage by NASA Ames Research Center (ARC) health and safety professionals**

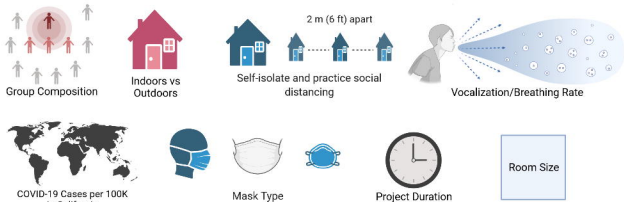

NASA ARC used CEAT to determine lowest COVID-19 exposure in different work scenarios

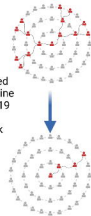

A)

**Start Step 1** Enter information that describes the group.

**a. Group's Infection Likelihood compared to the Community**

The Group is composed of people who, prior to this activity, you estimate have a likelihood of COVID-19 infection that is:

|                                                                                                                                                                                                                     |                          |                          |
|---------------------------------------------------------------------------------------------------------------------------------------------------------------------------------------------------------------------|--------------------------|--------------------------|
| 10x lower than the community's average due to their adhering to public health guidance on distancing, masking, and exposure to crowds/people.                                                                       | <input type="checkbox"/> | <input type="checkbox"/> |
| 10x lower than the community's average due to their adhering to public health guidance on distancing, masking, and exposure to crowds/people. Equal to the community average.                                       | <input type="checkbox"/> | <input type="checkbox"/> |
| 10x higher than the community's average due to their not adhering to public health guidance on distancing, masking, and exposure to crowds. 100 percent, since they are known to be diagnosed with active COVID-19. | <input type="checkbox"/> | <input type="checkbox"/> |

**b. Group's Vaccination Rate:** 100.00 %  Click to apply Group's Vaccination Rate to the Exposure Calculations

**c. Group members use of viral genome or protein surveillance testing**

All members are tested within 3 days prior to event  All unvaccinated members are tested within 3 days prior to event (or testing status unknown)  Testing not required

**Step 2** Enter the number of people sharing the space for the activity. Must be between 2 and 250 people.

Number of People: **A** 2 **B** 2

Sharing Activity Space: **A** 2 **B** 2

**Step 3** Enter distance (Option 1) or select distance (Option 2)

Option 1: **A** 3.00 **B** 3.00

Option 2:  1m  2m  3m  4m  5m  6m  7m  8m  9m  10m

**Step 4** Select Mask Type and Prevalence of mask wearing

Filter Type: **A** **B**

|                      |                          |                          |
|----------------------|--------------------------|--------------------------|
| Fitted N95           | <input type="checkbox"/> | <input type="checkbox"/> |
| N95/N99              | <input type="checkbox"/> | <input type="checkbox"/> |
| Double Surgical Mask | <input type="checkbox"/> | <input type="checkbox"/> |
| Surgical Mask        | <input type="checkbox"/> | <input type="checkbox"/> |
| Average Mask         | <input type="checkbox"/> | <input type="checkbox"/> |
| Cloth Mask           | <input type="checkbox"/> | <input type="checkbox"/> |
| No Mask              | <input type="checkbox"/> | <input type="checkbox"/> |

% of People Wearing Masks: 0% to 100%

**Step 5** Select Vocalization Intensity **Step 6** Select Breathing Rate

| Activity       | Exhalation Type | A                        | B                        |
|----------------|-----------------|--------------------------|--------------------------|
| Resting        | Silent          | <input type="checkbox"/> | <input type="checkbox"/> |
|                | Speaking        | <input type="checkbox"/> | <input type="checkbox"/> |
|                | Loudly speaking | <input type="checkbox"/> | <input type="checkbox"/> |
| Standing       | Silent          | <input type="checkbox"/> | <input type="checkbox"/> |
|                | Speaking        | <input type="checkbox"/> | <input type="checkbox"/> |
|                | Loudly speaking | <input type="checkbox"/> | <input type="checkbox"/> |
| Light exercise | Singing         | <input type="checkbox"/> | <input type="checkbox"/> |
|                | Speaking        | <input type="checkbox"/> | <input type="checkbox"/> |
|                | Loudly speaking | <input type="checkbox"/> | <input type="checkbox"/> |
| Heavy exercise | Silent          | <input type="checkbox"/> | <input type="checkbox"/> |
|                | Speaking        | <input type="checkbox"/> | <input type="checkbox"/> |
|                | Loudly speaking | <input type="checkbox"/> | <input type="checkbox"/> |

| Activity               | A                        | B                        |
|------------------------|--------------------------|--------------------------|
| Sleep                  | <input type="checkbox"/> | <input type="checkbox"/> |
| Resting                | <input type="checkbox"/> | <input type="checkbox"/> |
| Passive/Light Activity | <input type="checkbox"/> | <input type="checkbox"/> |
| Moderate Exertion      | <input type="checkbox"/> | <input type="checkbox"/> |
| Heavy Exertion         | <input type="checkbox"/> | <input type="checkbox"/> |

**Step 7** Enter the duration that most closely matches the activity.

Duration of Activity in Hours: **A** 0.25 **B** 0.25

**Step 8** Select whether outdoor or indoor

a. Outdoor:  A:  B:  Outdoor activities: Select wind conditions that best match.

|           |                | Beaufort Scale                                                 |                          | A                        | B                        |
|-----------|----------------|----------------------------------------------------------------|--------------------------|--------------------------|--------------------------|
| Moderate  | 21 - 29 km/h   | Raises dust and loose paper, small branches are moved          | <input type="checkbox"/> | <input type="checkbox"/> | <input type="checkbox"/> |
| Gentle    | 15 - 19 km/h   | Leaves/small twigs in constant motion, wind extends light flag | <input type="checkbox"/> | <input type="checkbox"/> | <input type="checkbox"/> |
| Light     | 8 - 13 km/h    | Wind felt on face, leaves rustle                               | <input type="checkbox"/> | <input type="checkbox"/> | <input type="checkbox"/> |
| Calm      | 2 - 5 km/h     | Direction of wind shown by smoke drift                         | <input type="checkbox"/> | <input type="checkbox"/> | <input type="checkbox"/> |
| Very Calm | 0.8 - 1.3 km/h | No direction or flow observed                                  | <input type="checkbox"/> | <input type="checkbox"/> | <input type="checkbox"/> |

b. Indoor:  A:  B:

Obtain the Air Changes per Hour (ACH) using Option 1 or 2:

**Option 1** - Use ACH provided by building engineers or H&S.

**Option 2** - from Table 1 on right, select the facility type and ACH that best matches the activity location.

**Table 1: Typical ACH Values (Option 2)**

| Facility Type               | ACH  |
|-----------------------------|------|
| General                     | 6    |
| Laboratory                  | 6    |
| Treatment room              | 6    |
| Classroom/room              | 6    |
| Retail                      | 1.5  |
| Sales (except as below)     | 1.5  |
| Hair and nail salons        | 1.75 |
| Department                  | 1    |
| Fast food                   | 6    |
| Bar                         | 2.4  |
| Restaurants                 | 1.4  |
| Education                   |      |
| Classrooms (ages 5 to 16)   | 2    |
| Classrooms (age 9 plus)     | 2    |
| Classroom (through age 12)  | 2.5  |
| Multiple assembly           | 5    |
| Lecture (closed doors)      | 7    |
| Lecture (open doors)        | 3    |
| Lecture (closed)            | 3    |
| Libraries                   | 1.5  |
| Music/Choir/dance           | 1.5  |
| Office                      |      |
| Office space                | 0.5  |
| Reception Area              | 1.25 |
| Meeting/Conference Rooms    | 2    |
| Manufacturing               |      |
| Manufacturing floor         | 1.5  |
| Residential                 |      |
| Homes with closed windows   | 0.5  |
| Rooms with one open window  | 1.75 |
| Homes with all open windows | 3    |
| Travel                      |      |
| Aircraft                    | 20   |
| Trains/Buses                | 6    |
| Cars (Windows Closed)       | 6    |
| Cars (Windows Open)         | 10   |

Enter indoor ACH (or AER) Values:

Indoor ACH: **A** 6.00 **B** 6.00

<sup>1</sup> ACH (Air Changes per Hour) is synonymous with AER (Air Exchange Rate (Exchanges/Hours))

c. Room Filtration

Select Flowrate Option:

Flow Option 1 - Use a default assumption of flow of filtered air of 5 L/sec/m<sup>2</sup>.

Flow Option 2 - Enter a specific filtration flow rate if known

Flowrate (L/sec): 0

|              |                          |                          |
|--------------|--------------------------|--------------------------|
| HEPA Filters | <input type="checkbox"/> | <input type="checkbox"/> |
| MERV 13      | <input type="checkbox"/> | <input type="checkbox"/> |
| MERV 8       | <input type="checkbox"/> | <input type="checkbox"/> |
| No Filters   | <input type="checkbox"/> | <input type="checkbox"/> |

**Step 9** If indoors, enter the room dimensions and the height of the ceiling.

Room Length (m): **A** 2.8 **B** 2.8

Room Width (m): **A** 2.8 **B** 2.8

Ceiling Height (m): **A** 3.00 **B** 3.00

Room Area (m<sup>2</sup>): **A** 8.0656 **B** 8.0656

Room Volume (m<sup>3</sup>): **A** 24.196 **B** 24.196

© 2022 Signature Science, LLC

Notes: Oslo, Louise Restaurant, 30 Nov 2021

International System of Units (SI) 31 January 2022 V 8.35\_Si EA

Save As

Important: CEAT must be opened with Adobe Acrobat® or Adobe Reader® to function. See Page 2 for a technical summary and Page 3 for instructions.

**Step 10** Calculate Adjustment to Local Community's Current Conditions

Average Daily Cases per 100,000 (in the Last Week): 36.50

Average Days Infectious (Set to 5 if not known): 5.00

Undiagnosed Factor for Area (Set to 3 if not known): 5.0

Active Infections per 100,000: 909.2

| Variant Prevalence | Estimate of Portion of Active Infections (%) | Comparative Increased Transmission versus Wild-Type Virus (%) | Immunity Prevalence                      |
|--------------------|----------------------------------------------|---------------------------------------------------------------|------------------------------------------|
| WHO Variant Label  |                                              |                                                               | Population Vaccination Rate (%)          |
| Alpha              | 0.00                                         | 0.00                                                          | Population Recovered (%)                 |
| Beta               | 0.00                                         | 0.00                                                          | Protection Effectiveness of Immunity (%) |
| Delta              | 0.00                                         | 100.00                                                        | Correlation Factor                       |
| Omicron            | 0.00                                         | 940.00                                                        | Poison Distribution Adjustment Factor    |

**Result:**

Group-wide Exposure Ratio

| Exposure Ratio | Lower Exposure           | Medium                   | High                     | Very High                |
|----------------|--------------------------|--------------------------|--------------------------|--------------------------|
| A              | <input type="checkbox"/> | <input type="checkbox"/> | <input type="checkbox"/> | <input type="checkbox"/> |
| B              | <input type="checkbox"/> | <input type="checkbox"/> | <input type="checkbox"/> | <input type="checkbox"/> |

| Group-wide Exposure Ratio          | A        | B        |
|------------------------------------|----------|----------|
| Group-wide Exposure Ratio:         | 0.58190e | 0.58190e |
| Near Field:                        | 0.38502e | 0.19688e |
| Far Field:                         | 0.38502e | 0.19688e |
| Individual (Indv.) Exposure Ratio: | 0.58190e | 0.58190e |
| Indv. Dose (Quanta):               | 0.0256   | 4.191e   |
| Infect Rate:                       | 1        | 4.191e   |
| # of Index Infections:             | 1        | 1        |

**END** Take actions to reduce exposure!

**HIGH OR VERY HIGH:** Make changes to reduce exposure. Rethink the event or activity. Combine multiple mitigations such as using N95 masks, increasing ventilation, holding event outside, greatly increasing distancing, reducing people, or shortening the duration

**Disclaimer Statement:**

By using this tool you agree to be bound by this disclaimer. This tool does not provide a prediction of the likelihood of infection or transmission of disease, nor does the tool provide advice or guarantee outcome. It solely provides a means for the user to estimate theoretical relative exposure. It is intended for informational purposes only and users should not rely on output for decision-making. Information is gathered from various sources and Signature Science, LLC, COVID-19 or its members are not responsible for errors or omissions in data. No warranties are given in relation to this tool and it is not guaranteed as fit for purpose. Page 1

B)

**1** Comparative Group-wide Dose Equation and Corresponding CEAT Model Steps

| RESULT:               | Step 1:                    | Step 10:           | Step 5:           | Step 2:     | Step 3:    | Step 8:          | Step 9:     | Step 7:  | Step 4a:                         | Step 4b:                         | Step 6:         | Step 2:     | Step 7:  | Step 10:                   | Step 1:                    |
|-----------------------|----------------------------|--------------------|-------------------|-------------|------------|------------------|-------------|----------|----------------------------------|----------------------------------|-----------------|-------------|----------|----------------------------|----------------------------|
| Group-wide Dose Ratio | Behavior of Sub Population | Local Epidemiology | Emission of Virus | # of People | Distancing | Ventilation Rate | Indoor Dim. | Duration | Mask Effectiveness on Exhalation | Mask Effectiveness on Inhalation | Inhalation Rate | # of People | Duration | Local Epidemiology Factors | Behavior of Sub Population |

$$\frac{\bar{D}_{Quanta\ i}}{\bar{D}_{Quanta\ BL}} = \frac{\varphi_i}{\varphi_{BL}} \times \frac{\dot{M}_i}{\dot{M}_{BL}} \times \frac{P_{e\ emitting\ i}}{P_{e\ emitting\ BL}} \times \frac{\sum_{i=1}^{Pe-1} (FF_{Factor\ i} + NF_{Factor\ i})}{\sum_{i=1}^{Pe-1} (FF_{Factor\ BL} + NF_{Factor\ BL})} \times \frac{(1 - E_{f\ out\ i})}{(1 - E_{f\ out\ BL})} \times \frac{(1 - E_{f\ in\ i})}{(1 - E_{f\ in\ BL})} \times \frac{Q_{in\ hale\ i}}{Q_{in\ hale\ BL}} \times \frac{P_{e\ total\ i}}{P_{e\ total\ BL}} \times \frac{\Delta t_i}{\Delta t_{BL}} \times \frac{V_{ariant\ Adj\ i}}{V_{ariant\ Adj\ BL}} \times \frac{I_{mmunity\ Adj\ i}}{I_{mmunity\ Adj\ BL}} \times \frac{T_{est\ Adj\ i}}{T_{est\ Adj\ BL}}$$

| $\bar{D}_{mass}$                     | $\varphi$                                                                                                                      | $\dot{M}$                                  | $P_{e\ emitting}$                                                               | $FF_{Factor}$                                         | $NF_{Factor}$                                         | $E_{f\ out}$                                                                   | $E_{f\ in}$                                                                    | $Q_{in\ hale}$                         | $P_{e\ total}$                          | $\Delta t$                  | $V_{ariant\ Adj}$                                                                                  | $I_{mmunity\ Adj}$                                                                                        | $T_{est\ Adj}$                                                               | $BL$                        | $i$                                        |
|--------------------------------------|--------------------------------------------------------------------------------------------------------------------------------|--------------------------------------------|---------------------------------------------------------------------------------|-------------------------------------------------------|-------------------------------------------------------|--------------------------------------------------------------------------------|--------------------------------------------------------------------------------|----------------------------------------|-----------------------------------------|-----------------------------|----------------------------------------------------------------------------------------------------|-----------------------------------------------------------------------------------------------------------|------------------------------------------------------------------------------|-----------------------------|--------------------------------------------|
| Dose of inhaled contaminant (quanta) | Likelihood that any individual member of the group is infectious at the start of the scenario or modeled event (dimensionless) | Emission rate of contaminant (quanta/hour) | Number of emitting people (i.e., number of potential sources) in the group. (#) | Far Field Factor (m <sup>3</sup> /hour <sup>2</sup> ) | Far Field Factor (m <sup>3</sup> /hour <sup>2</sup> ) | Bulk mass efficiency of mask during exhalation for contaminant (dimensionless) | Bulk mass efficiency of mask during inhalation for contaminant (dimensionless) | Inhalation Rate (m <sup>3</sup> /hour) | Total number of people in the group (#) | Duration of exposure (hour) | Adjustment for higher transmission rate of variants as compared to wild type virus (dimensionless) | Adjustment for the rate of immunity and efficacy of immunity among the community or group (dimensionless) | Adjustment for the efficacy of test regimes used for a group (dimensionless) | Indicates baseline variable | Indicates value for the evaluated scenario |

**2** Individual Dose Ratio

$$\frac{\bar{D}_{Quanta\ i}}{\bar{D}_{Quanta\ BL}} = \frac{\varphi_i}{\varphi_{BL}} \times \frac{\dot{M}_i}{\dot{M}_{BL}} \times \frac{\sum_{i=1}^{Pe-1} (FF_{Factor\ i} + NF_{Factor\ i})}{\sum_{i=1}^{Pe-1} (FF_{Factor\ BL} + NF_{Factor\ BL})} \times \frac{(1 - E_{f\ out\ i})}{(1 - E_{f\ out\ BL})} \times \frac{(1 - E_{f\ in\ i})}{(1 - E_{f\ in\ BL})} \times \frac{Q_{in\ hale\ i}}{Q_{in\ hale\ BL}} \times \frac{\Delta t_i}{\Delta t_{BL}} \times \frac{V_{ariant\ Adj\ i}}{V_{ariant\ Adj\ BL}} \times \frac{I_{mmunity\ Adj\ i}}{I_{mmunity\ Adj\ BL}} \times \frac{T_{est\ Adj\ i}}{T_{est\ Adj\ BL}} \quad (Eq. 4)$$

**3** Individual Dose

$$\bar{D}_{Quanta\ i} = \varphi_i \times \dot{M}_i \times \sum_{i=1}^{Pe-1} (FF_{Factor\ i} + NF_{Factor\ i}) \times (1 - E_{f\ out\ i}) \times (1 - E_{f\ in\ i}) \times Q_{in\ hale\ i} \times \Delta t_i \times V_{ariant\ Adj\ i} \times I_{mmunity\ Adj\ i} \times T_{est\ Adj\ i} \quad (Eq. 5)$$

**4** Individual Dose with One Index Case, No Masking (before variant emergence, vaccination, and use test protocols)

$$\bar{D}_{Quanta\ i} = \varphi_i \times \dot{M}_i \times \sum_{i=1}^{Pe-1} (FF_{Factor\ i} + NF_{Factor\ i}) \times Q_{in\ hale\ i} \times \Delta t_i \quad (Eq. 6)$$

$\varphi_i = 1 / (P_{e\ total\ i} - 1)$



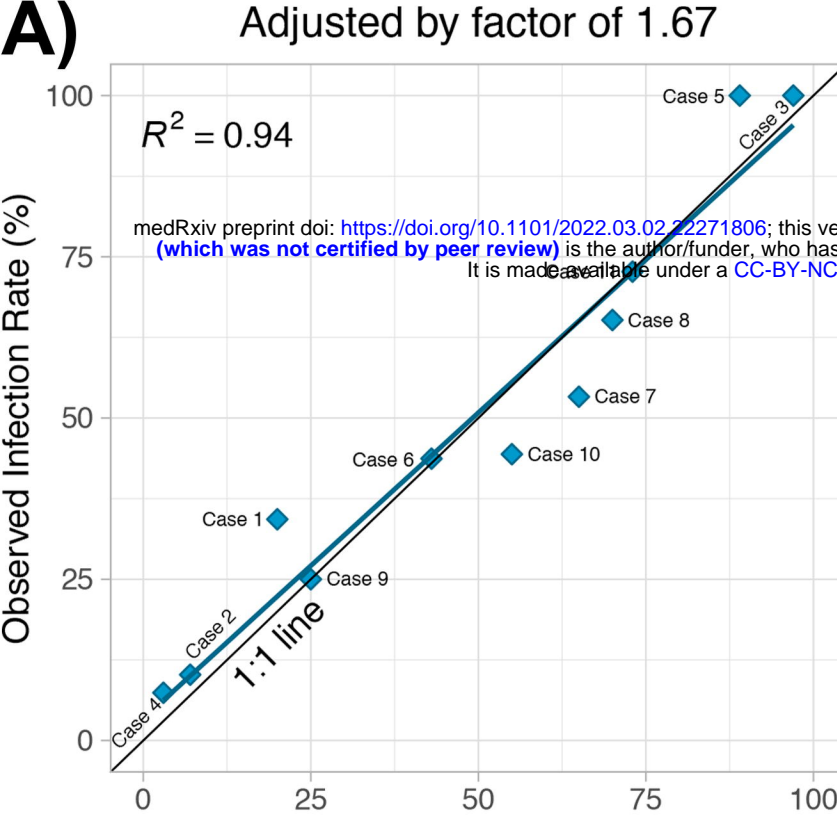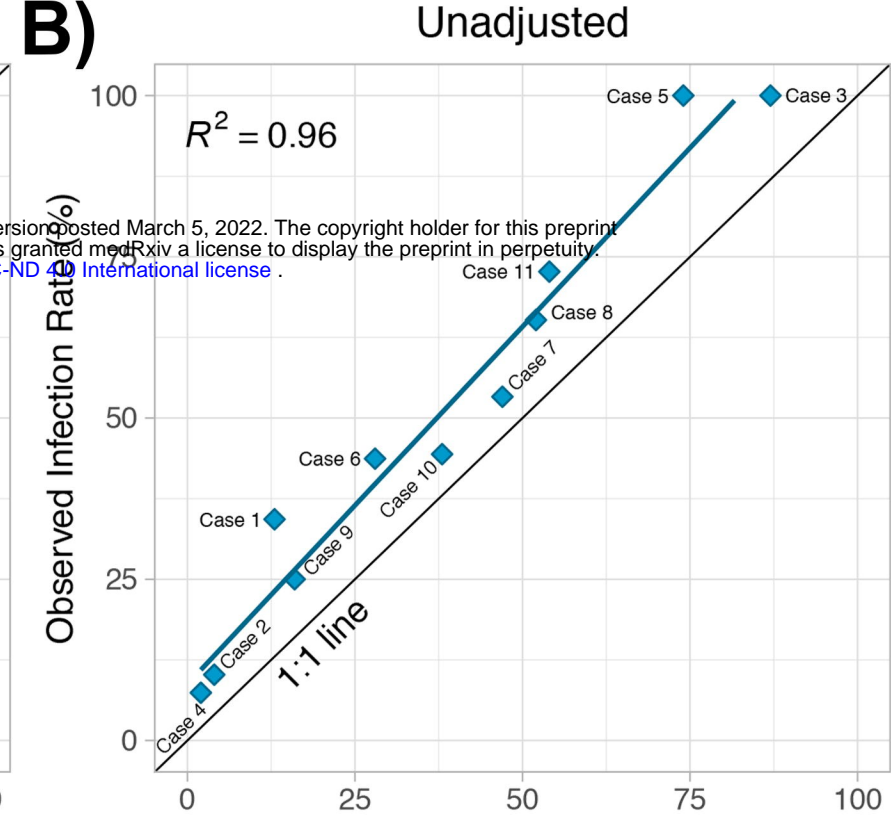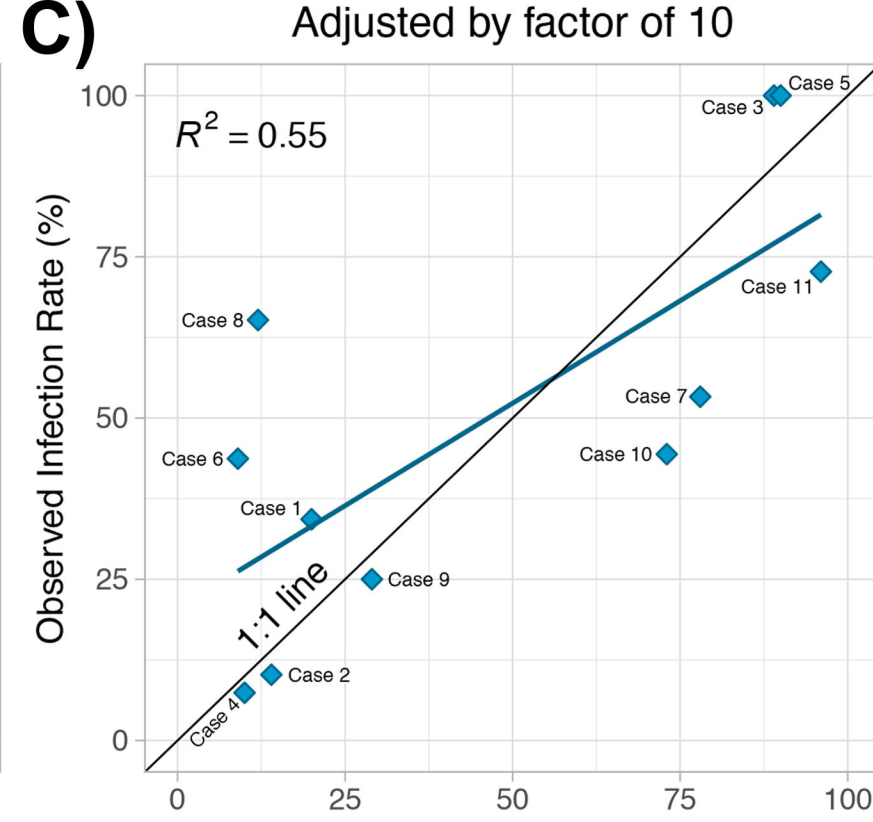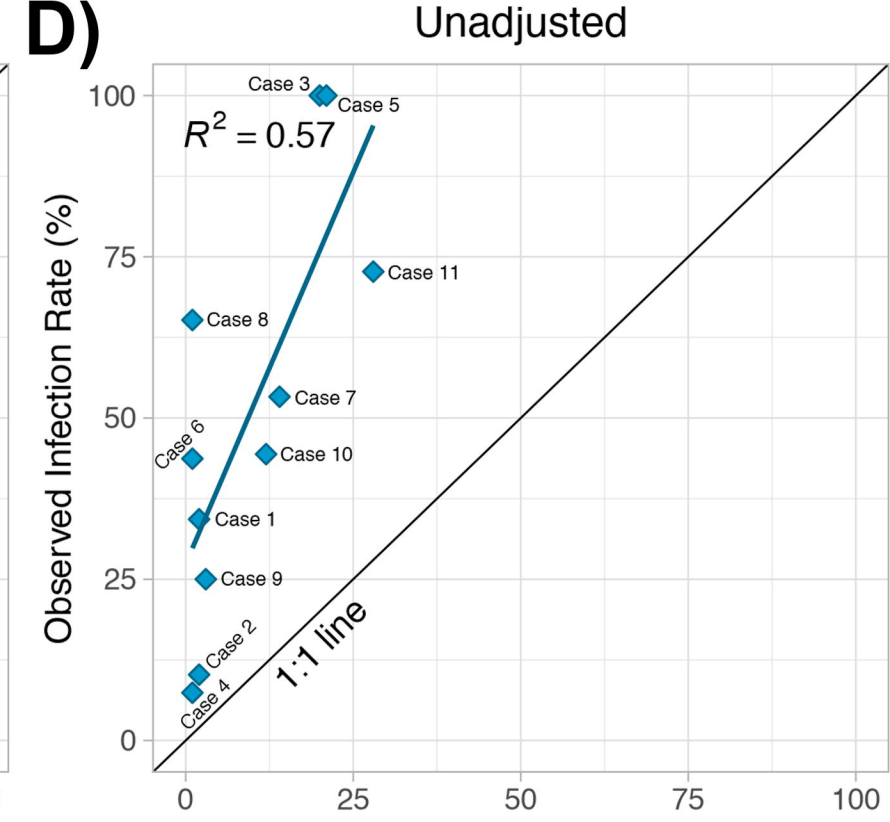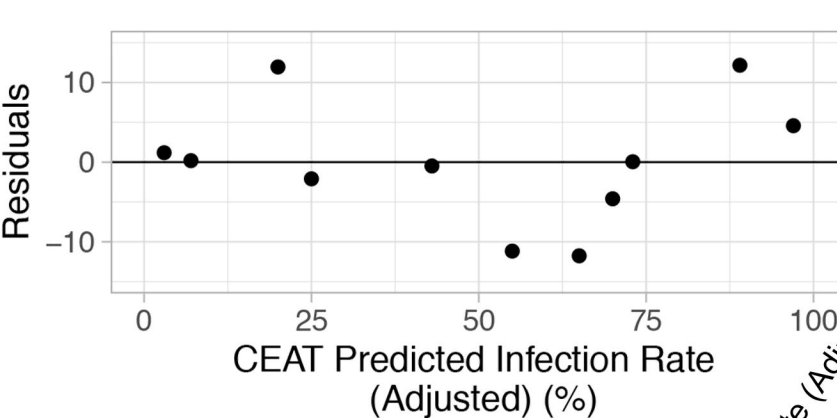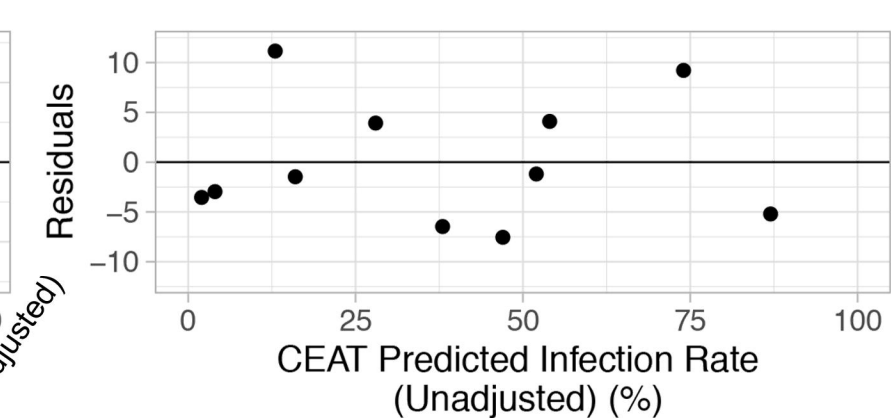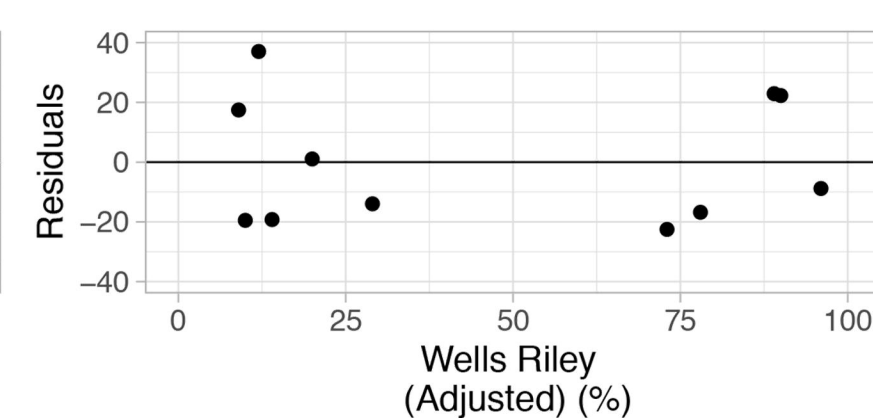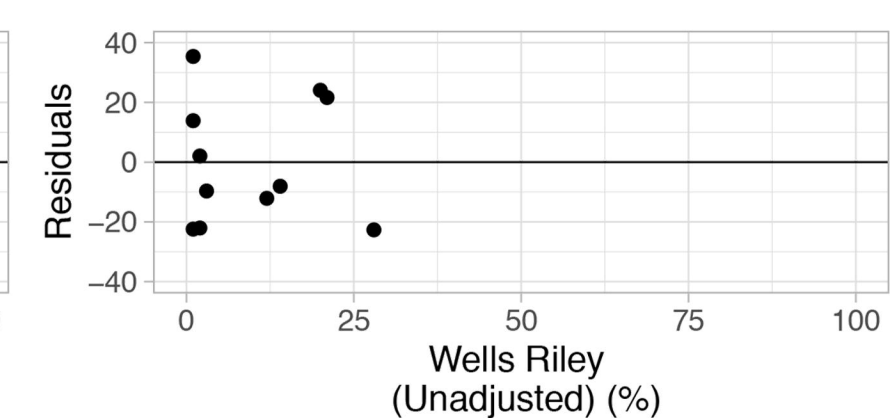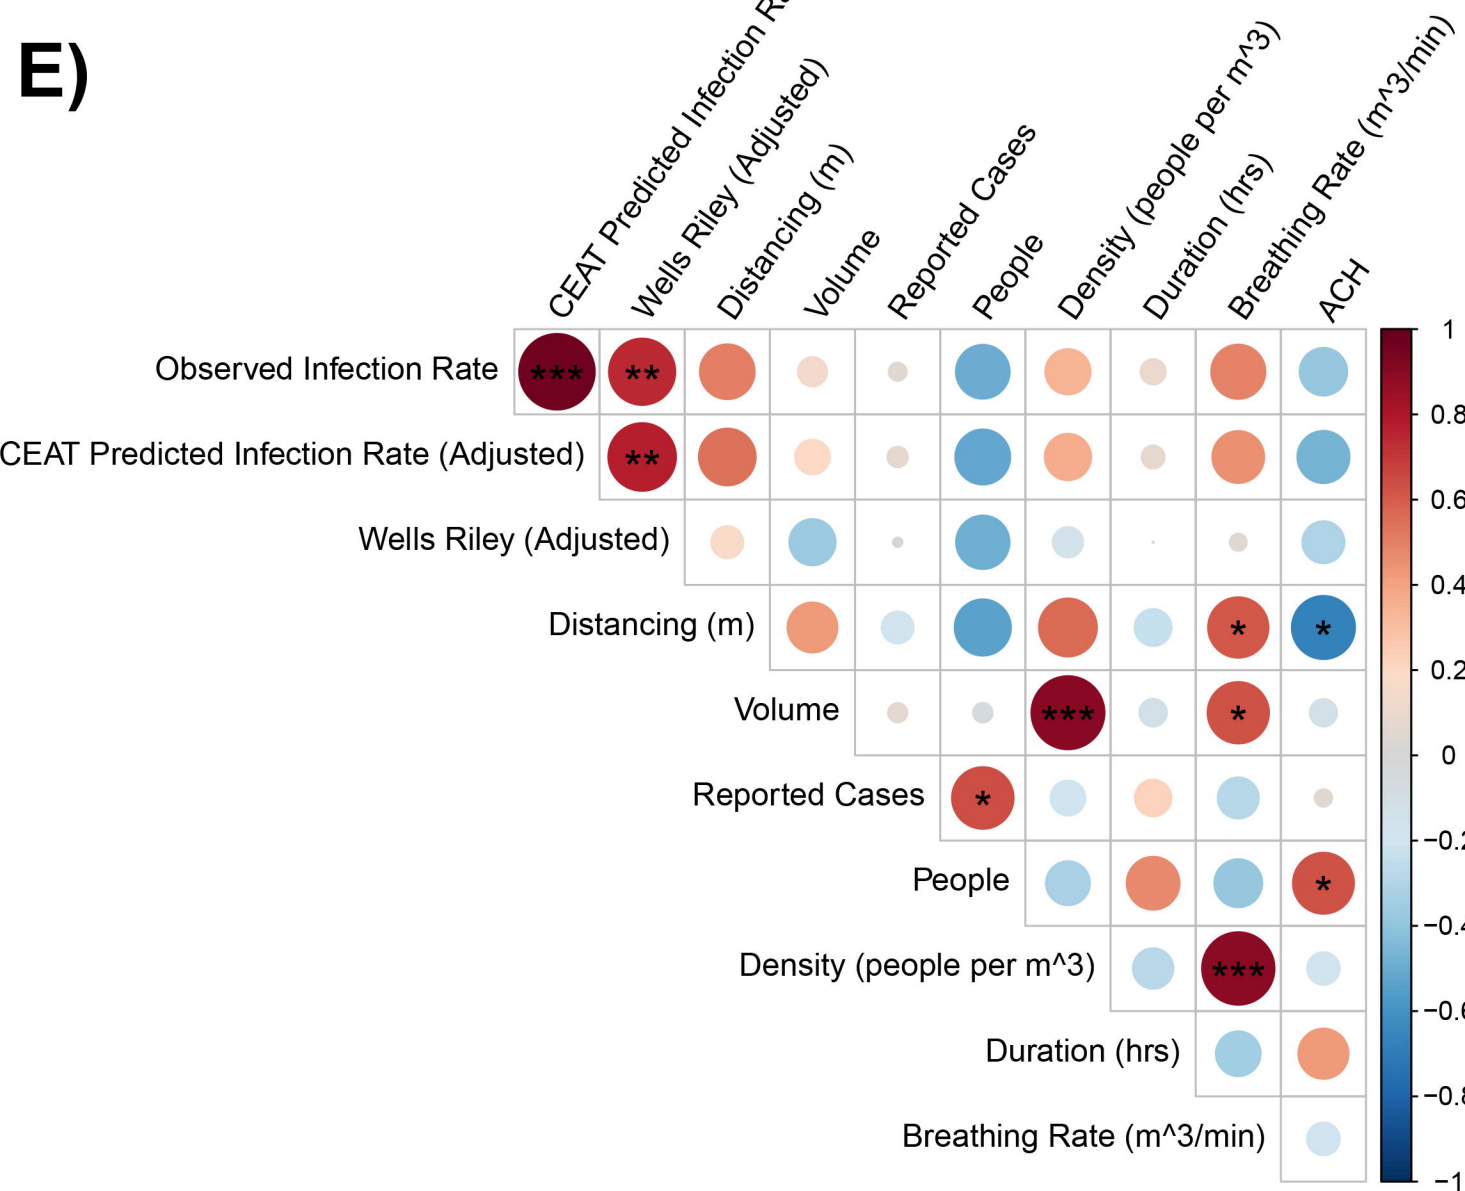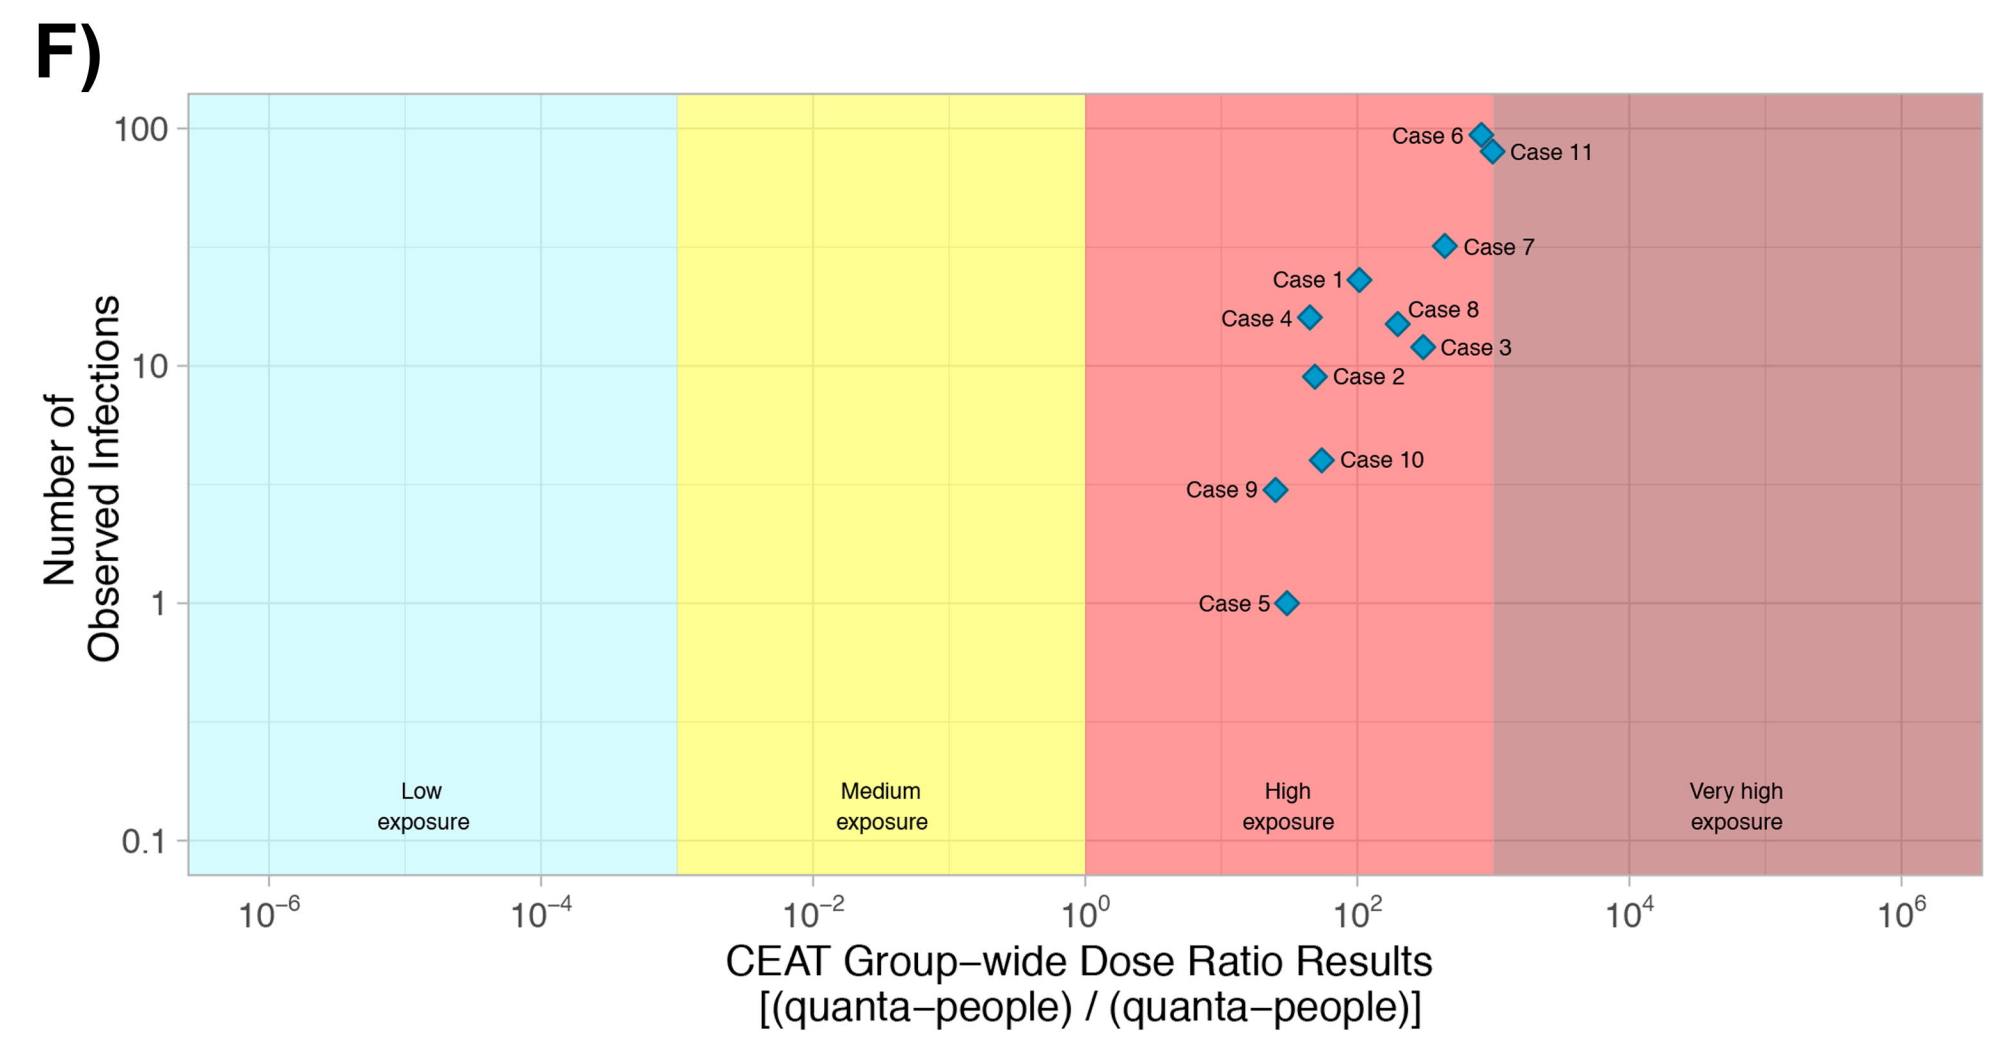



# COVID-19 Exposure Assessment for Gatherings of 5 hours

Very High Risk, High Risk, Medium Risk, Low Risk

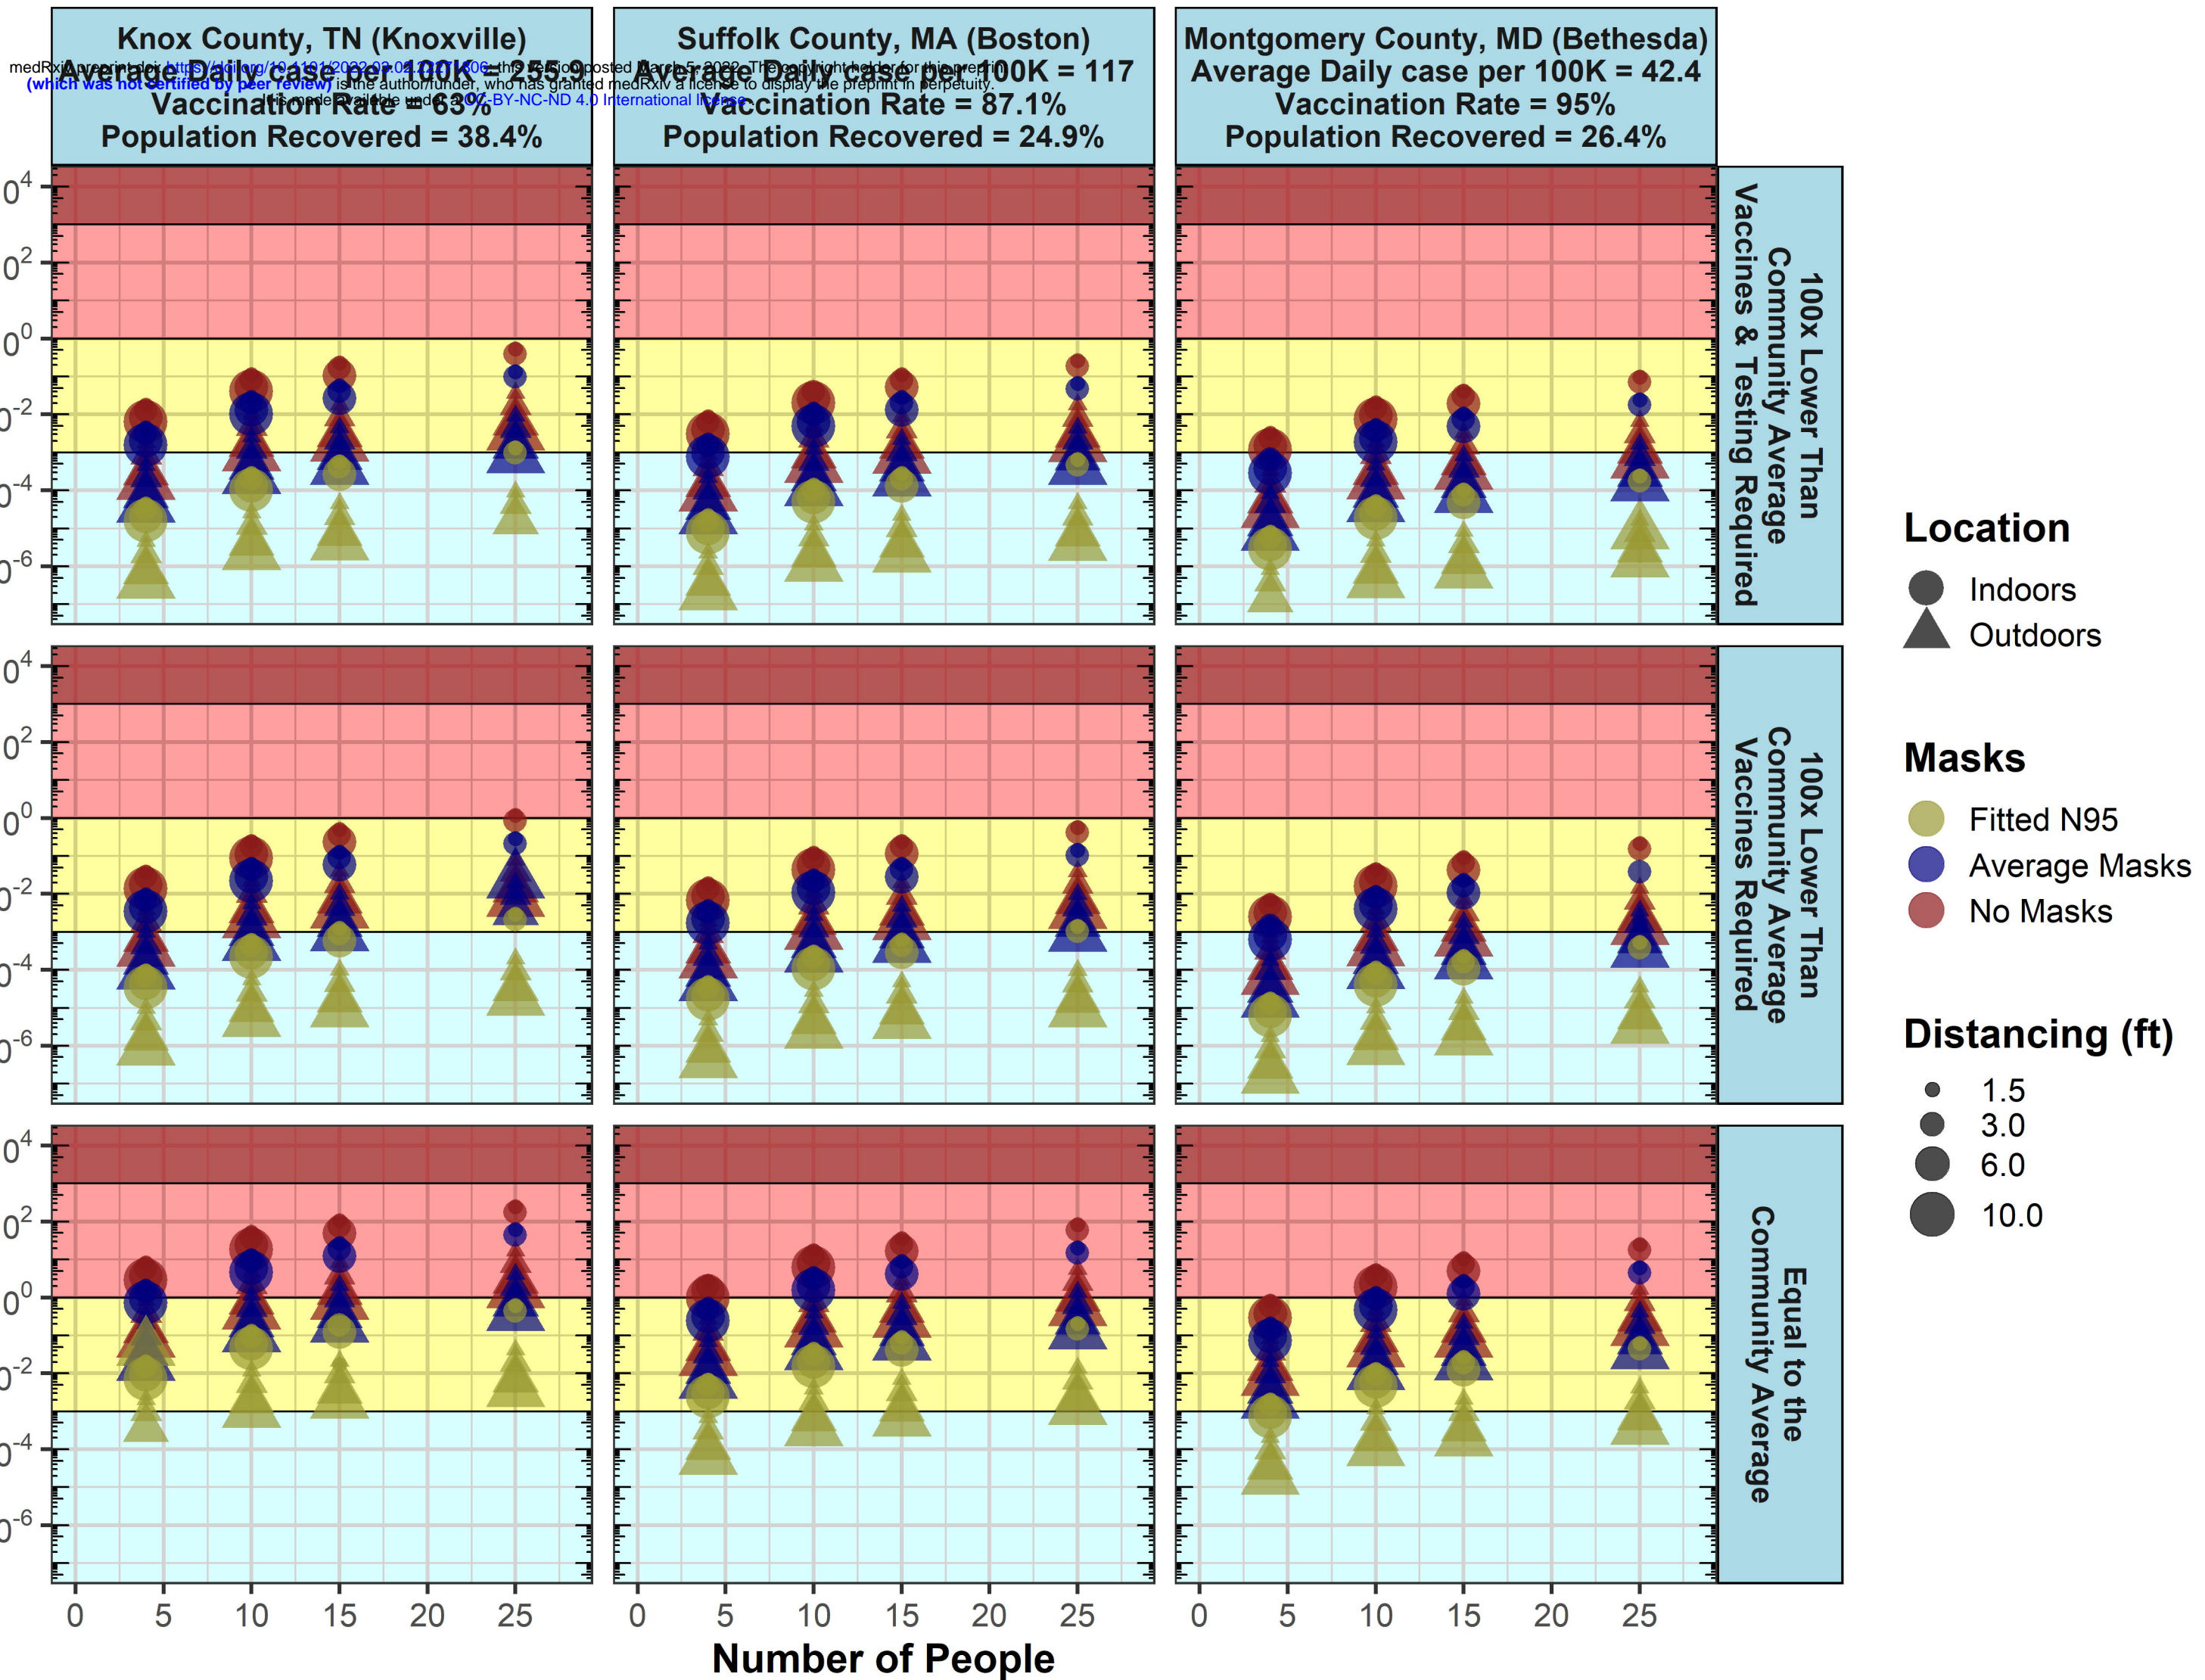



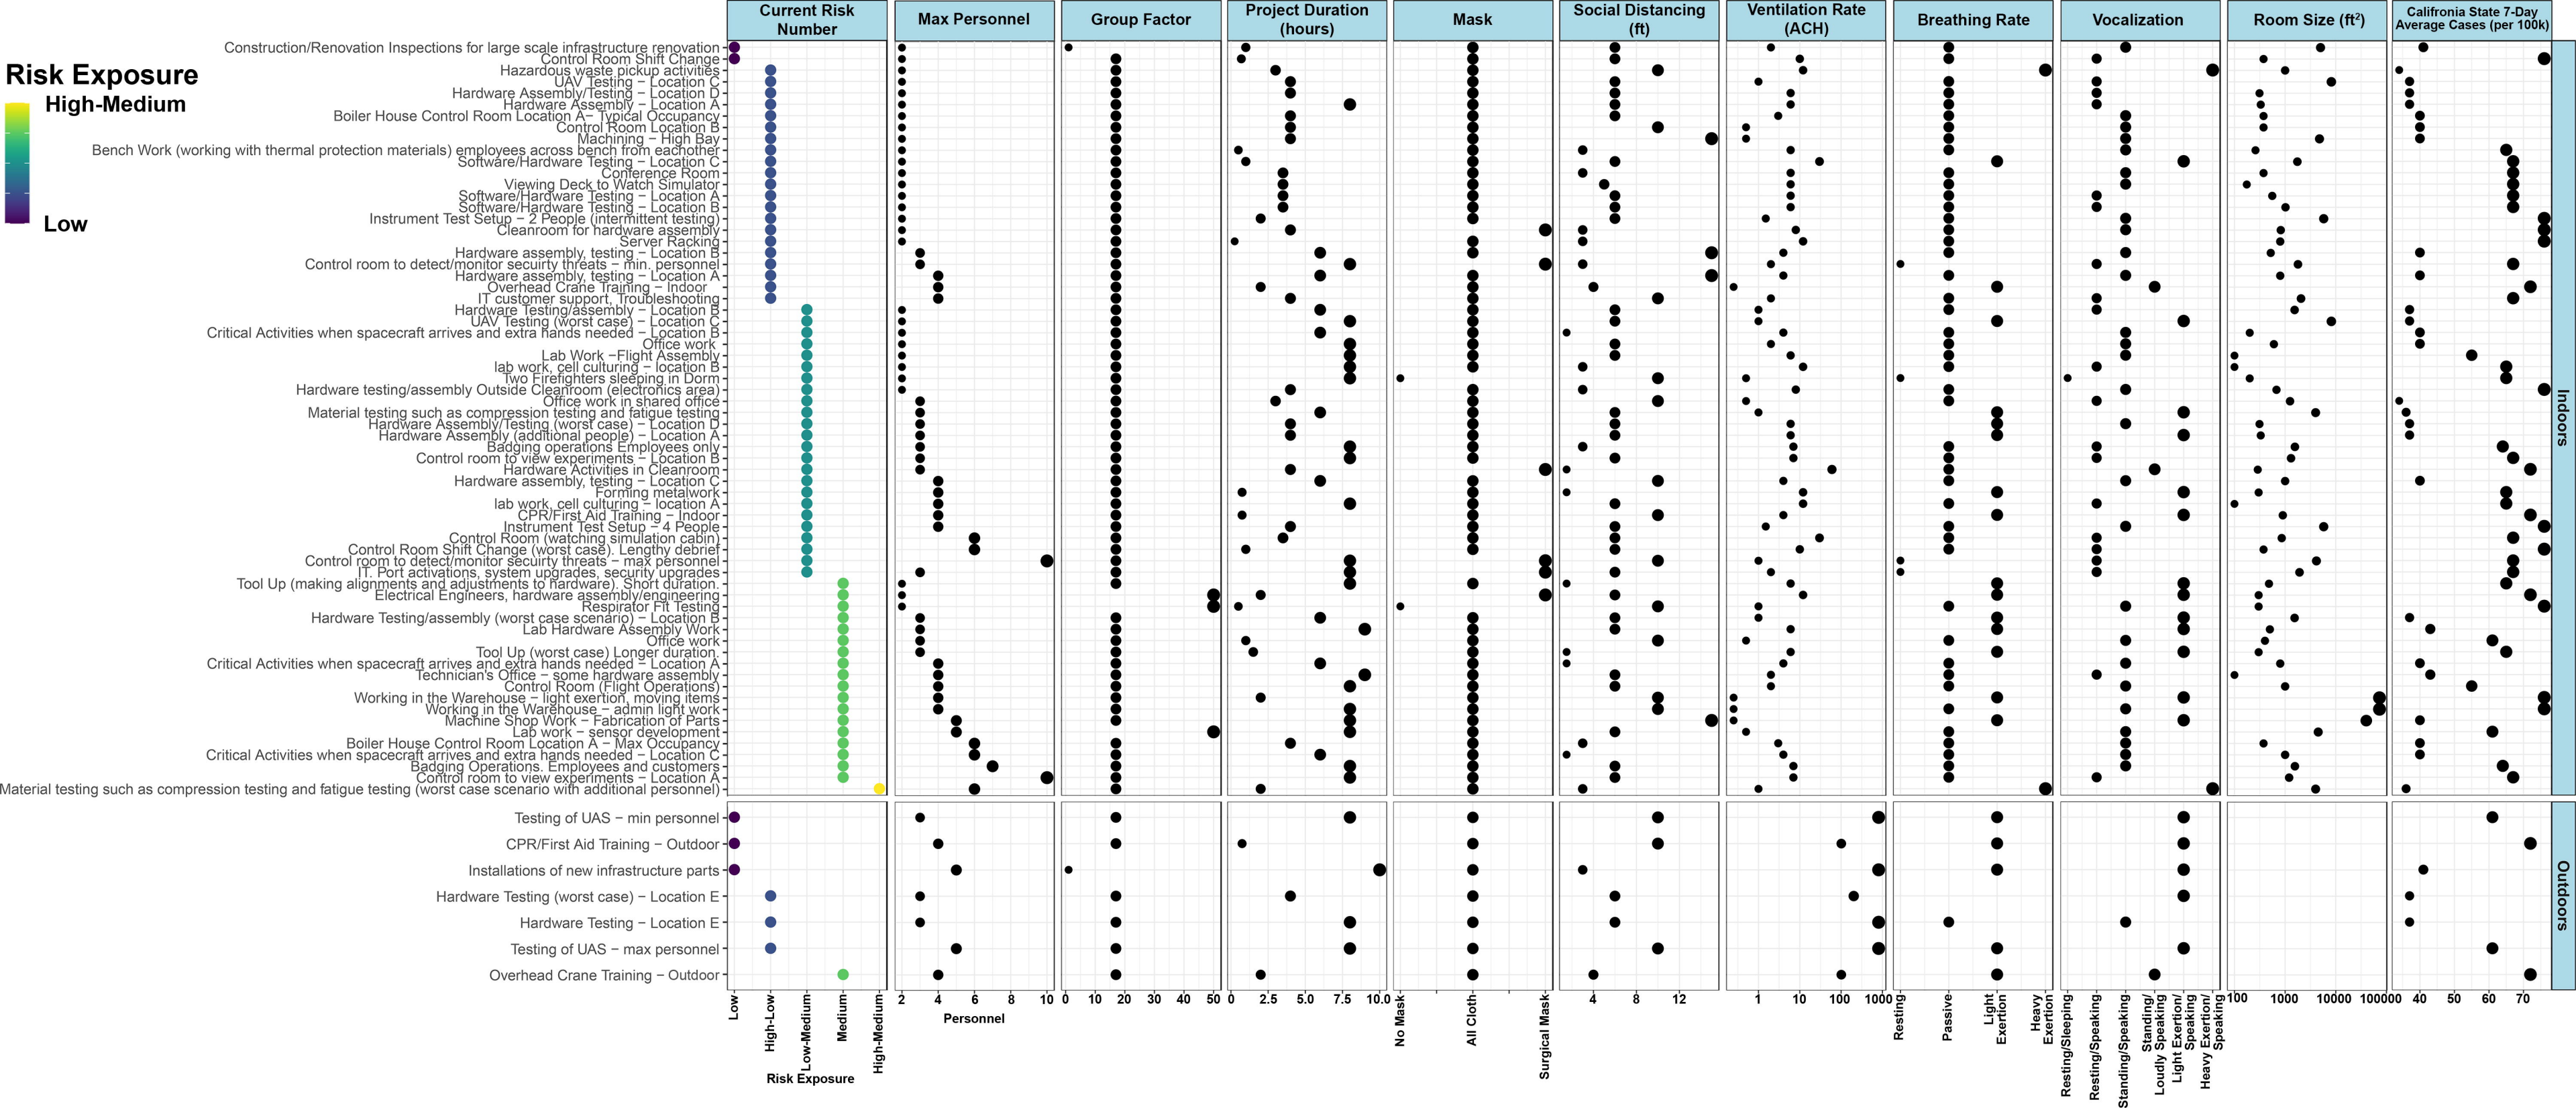



# NASA Ames Research Center Accepted Exposure Risk in Relation to Community Case Rates

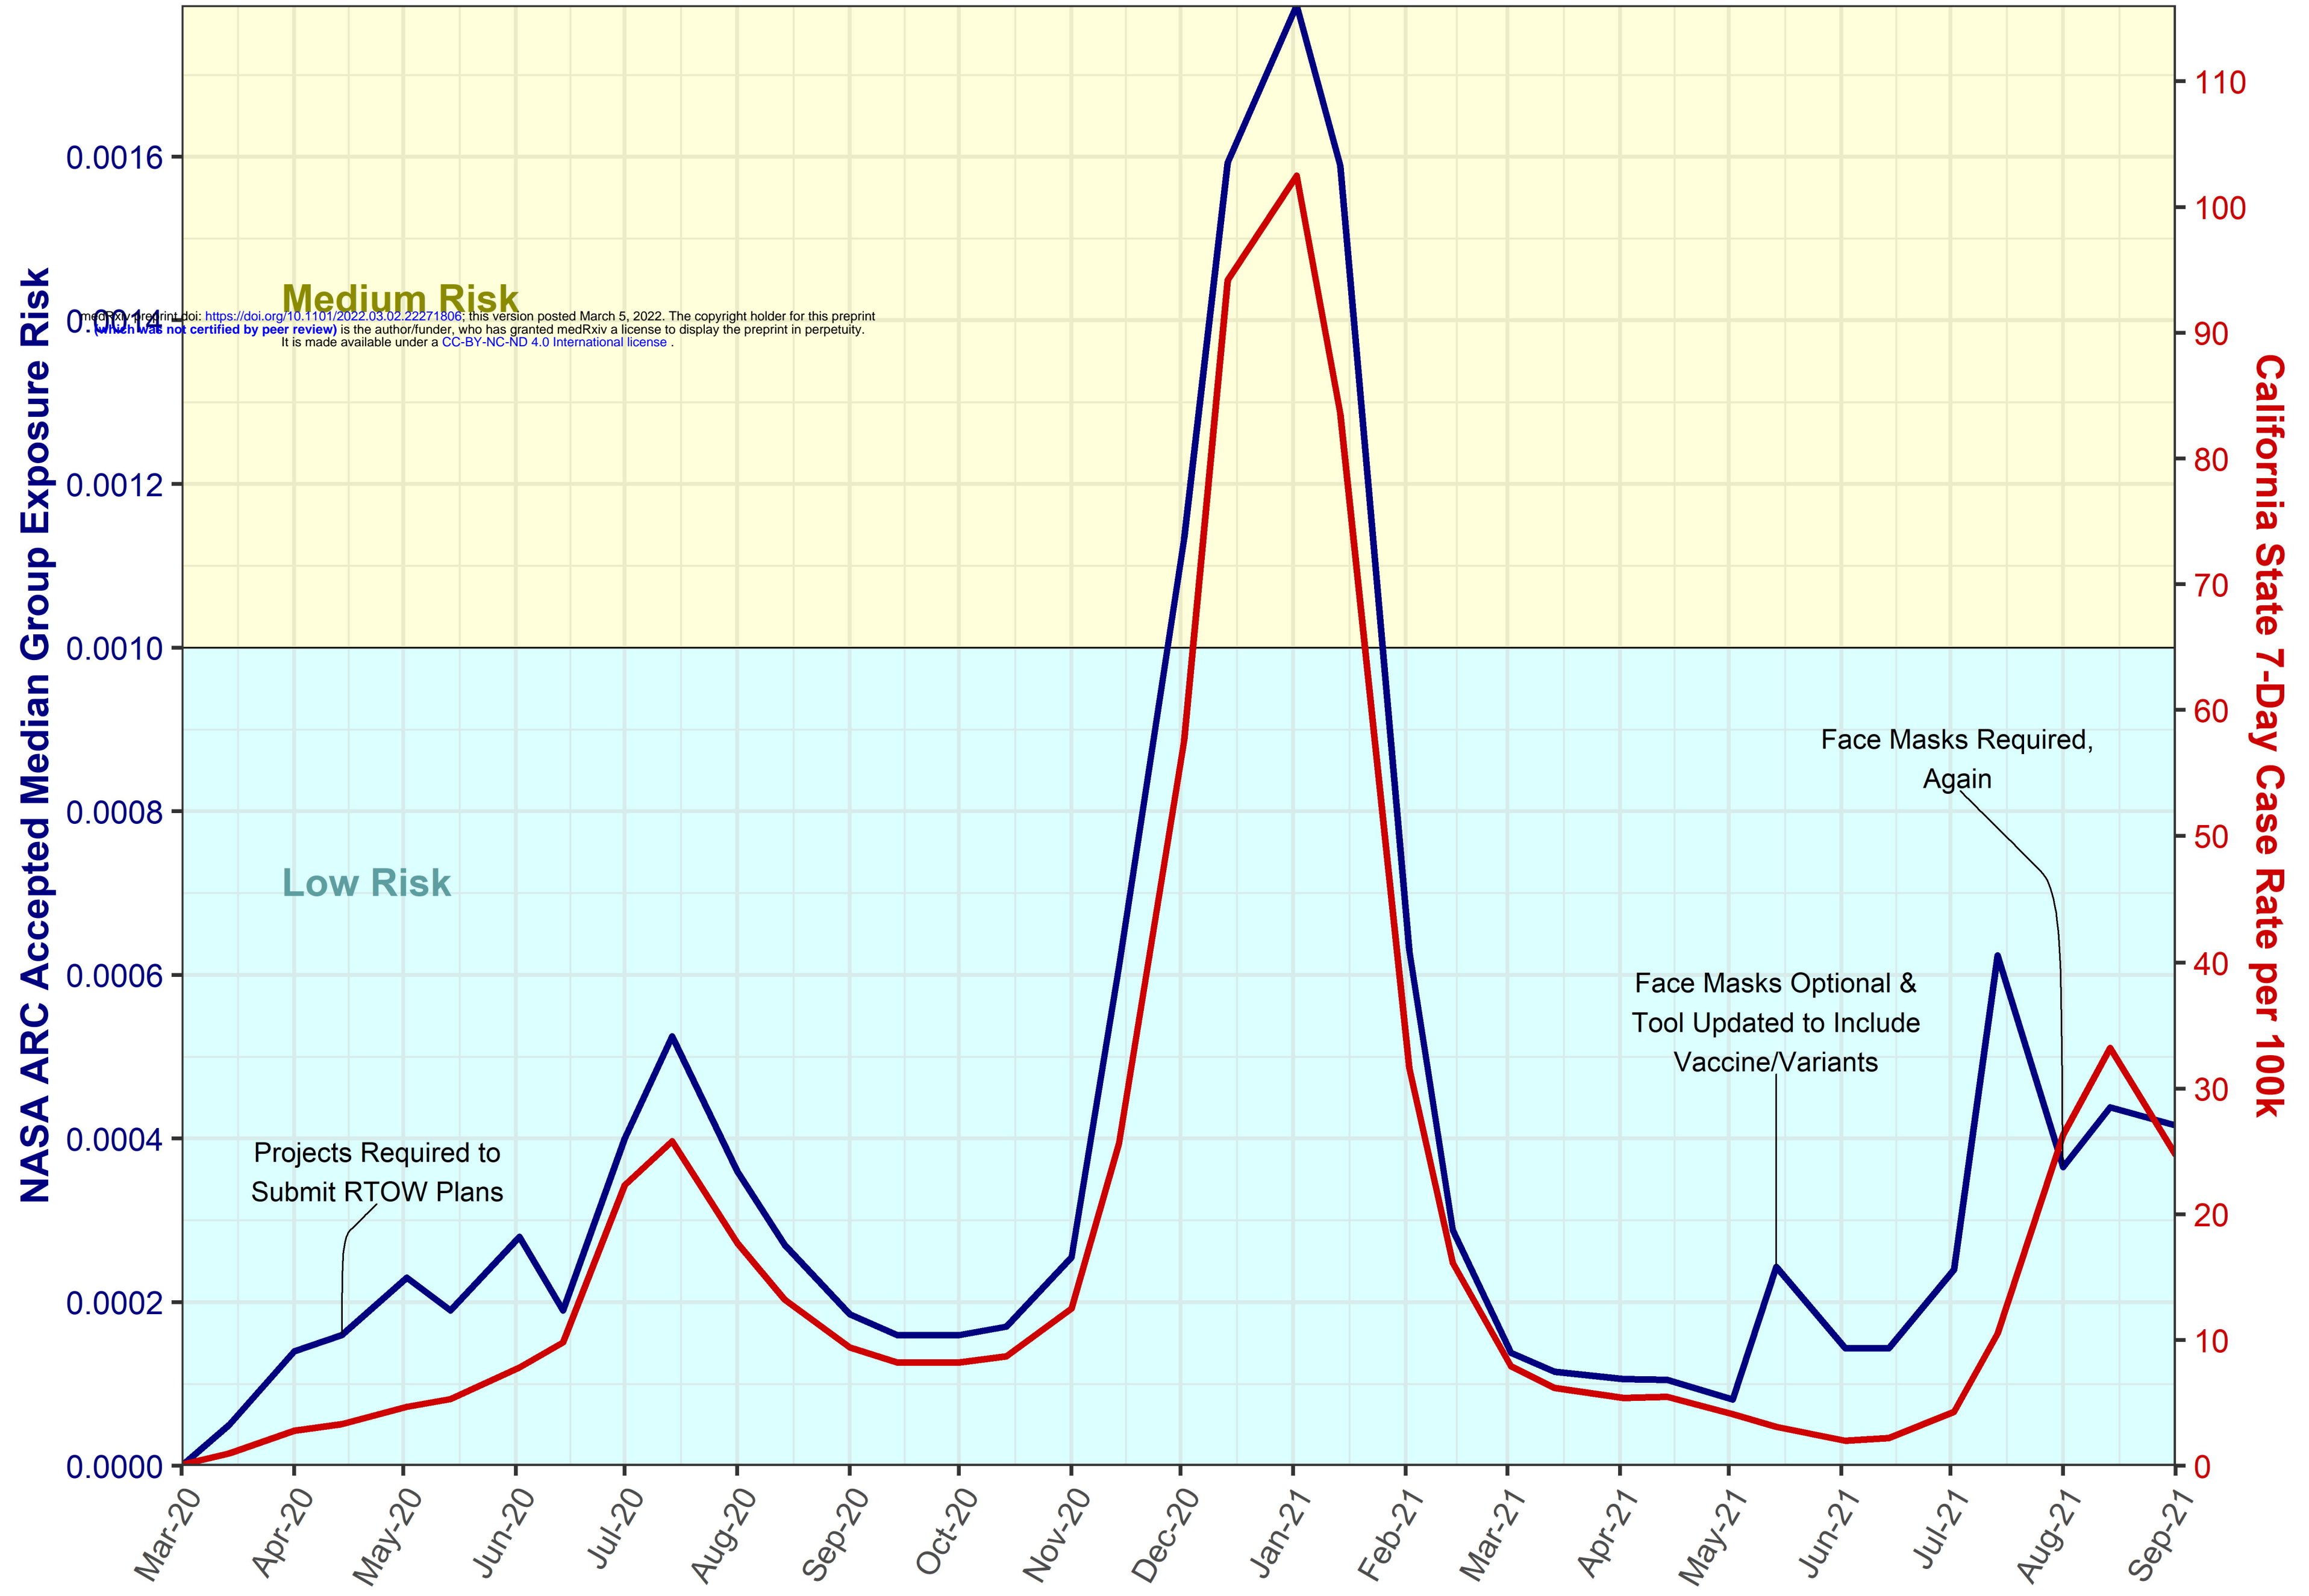

medRxiv preprint doi: <https://doi.org/10.1101/2022.03.02.22271806>; this version posted March 5, 2022. The copyright holder for this preprint (which was not certified by peer review) is the author/funder, who has granted medRxiv a license to display the preprint in perpetuity. It is made available under a [CC-BY-NC-ND 4.0 International license](https://creativecommons.org/licenses/by-nc-nd/4.0/).

| Factors considered in Exposure Dose Calculation                           | Factor Type                | CEAT Step # | Basis and/or Range of Values used in CEAT                                                                                                                                         |
|---------------------------------------------------------------------------|----------------------------|-------------|-----------------------------------------------------------------------------------------------------------------------------------------------------------------------------------|
| Likelihood of Infectious persons present in the group                     | Stochastic                 | 1           | Ranges over 5 orders of magnitude from the lowest (0.0001%) assumed for people adhering strictly to public health guidance, to the highest (100%) for those known to be infected. |
| Number of people in the group                                             | Mechanistic/<br>Stochastic | 2           | Ranges from 2 to 250 people.                                                                                                                                                      |
| Distance between people                                                   | Mechanistic                | 3           | Users are given discrete options: 4.5 m (~15 ft), 3 m (~10 ft), 2 m (~6ft), 1 m (~3 ft), and 0.5 m (~1.5 ft).                                                                     |
| Mask effectiveness                                                        | Mechanistic                | 4           | Range of mask effectiveness values based on published data for cloth, surgical, and N-95 masks. (CDC, 2020) (Mueller et al., 2020)                                                |
| Mask compliance on the group                                              | Stochastic                 | 4           | Ranges between 0 and 100 percent.                                                                                                                                                 |
| Emission rate of Infectious aerosols released through respiration         | Mechanistic                | 5           | Range of viral RNA emissions rates by activity in viral quanta per hour (Buonanno, et al., August 2020) (Buonanno et al., December 2020)                                          |
| Inhalation rate                                                           | Mechanistic                | 6           | Typical inhalation rates for adults at various activity intensities (US EPA, 2015)                                                                                                |
| Duration of exposure                                                      | Mechanistic                | 7           | Varies between 5 minutes and 12 hours                                                                                                                                             |
| Indoors or outdoors activity                                              | Mechanistic                | 8           | Indoor or Outdoor options affect the form of the concentration model used.                                                                                                        |
| Ventilation rates (air changes per hour [ACH] or air exchange rate [AER]) | Mechanistic                | 8           | (Values based on published sources (CDC, 2019) (ANSI/ASHRAE Standard 62.1-2019, 2020) (Howard-Reed et al., 2002)                                                                  |
| Aerosol settling rate                                                     | Mechanistic                | 8           | Removal by deposition on surfaces (CIRES, 2020)                                                                                                                                   |
| Virus degradation rate                                                    | Mechanistic                | 8           | An ACH contribution from viral aerosol degradation (CIRES, 2020)                                                                                                                  |
| Recirculating room filtration rate and removal efficiency                 | Mechanistic                | 8           | Recirculation of filtered air assumed to occur at a rate of 5 [L/s]/m <sup>2</sup> (1 cfm/ft <sup>2</sup> ) (ANSI/ASHRAE Standard 62.1-2019, 2020)                                |

|                                                                         |                             |          |                                                                                                                                                                                                                                                                                               |
|-------------------------------------------------------------------------|-----------------------------|----------|-----------------------------------------------------------------------------------------------------------------------------------------------------------------------------------------------------------------------------------------------------------------------------------------------|
| Volume of room or activity space                                        | Mechanistic                 | 9        | Varies based on user-specified dimensions, with constraints based on number of people and specified distancing. Ceiling height ranges between 2.15 meters (7 feet) and 20 meters (65 feet). Room side dimensions range between 2 meters (7 feet) and 200 meters (650 feet).                   |
| Prevalence of COVID-19 in the community                                 | Epidemiological /Stochastic | 10       | Active cases per 100,000 is estimated by the published "Average Daily Cases per 100,000 in the Last Week" available from various sources and estimates of the "Average Days Infectious" and "Undiagnosed Factor." (REF)                                                                       |
| Difference in the variants transmission rates versus wild type virus    | Epidemiological             | 10       | Users can adjust the equivalent exposure dose upward by a factor proportional to the reported increased variant transmission.                                                                                                                                                                 |
| Impact of community's or group's immunity from recovery and vaccination | Epidemiological             | 1 and 10 | Immunities are addressed in two ways: 1) Reduced shedding (3x reduction is used) (Levine-Tiefenbrun, et al., 2021); 2) User can enter value vaccine efficacy (from Graniss, et al., 2021 and Scobie, et al., 2021) to function as "effective immunity barrier" at a level consistent with its |
| Impact of surveillance testing for the group                            | Epidemiological             | 1        | Estimate (Need to come up with a reference for this)                                                                                                                                                                                                                                          |

**Table 1. Summary of Factors considered in CEAT.** Mechanistic, stochastic, epidemiological factors are accounted for the model exposure and inhalation dose

| <b>Case Number</b> | <b>Event Description</b>                                                     | <b>Volume of Room or Facility (m<sup>3</sup>)</b> | <b>People at Event</b> | <b>Total Cases Attributed to the event (Secondary Cases)</b> | <b>Total Infected Total Susceptible</b> | <b>Primary Reference</b> |
|--------------------|------------------------------------------------------------------------------|---------------------------------------------------|------------------------|--------------------------------------------------------------|-----------------------------------------|--------------------------|
| Case 1             | Bus, Zhejiang Province, China, 19 Jan 2020                                   | 80.0                                              | 68                     | 23                                                           | 34%                                     | Shen, et al., 2020       |
| Case 2             | Restaurant, Guangzhou, China, 24 Jan 2020                                    | 480.4                                             | 89                     | 9                                                            | 10%                                     | Li, et al., 2021         |
| Case 3             | Meeting, Munich, Germany, 21 February 2020                                   | 210.0                                             | 13                     | 12                                                           | 100%                                    | Hijnen, et al., 2020     |
| Case 4             | Commercial Aircraft, Flight VN54 (London, UK - Hanoi, Vietnam), 1 March 2020 | 662.2                                             | 217                    | 16                                                           | 7%                                      | Khanh, et al. 2020       |
| Case 5             | Recreational Squash Game, Maribor, Slovenia, 4 March 2020                    | 458.5                                             | 2                      | 1                                                            | 100%                                    | Brek, et al., 2020       |
| Case 6             | Call Center, South Korea, 8 March 2020                                       | 3267.0                                            | 216                    | 94                                                           | 44%                                     | Park, et al., 2020       |
| Case 7             | Choir Rehearsal, Skagit Valley, WA, USA, 10 March 2020                       | 808.0                                             | 61                     | 32                                                           | 53%                                     | Miller, et al., 2021     |
| Case 8             | Recreational Hockey, Tampa Bay, Florida USA 16 June 2020                     | 14452.7                                           | 24                     | 15                                                           | 65%                                     | Atrubin, et al. 2020     |
| Case 9             | Restaurant, Jeonju, South Korea, 17 June 2020                                | 184.8                                             | 13                     | 3                                                            | 25%                                     | Kwon, et al, 2020        |
| Case 10            | Court Room, Vaud, Switzerland,                                               | 149.5                                             | 10                     | 4                                                            | 44%                                     | Vernez, et al., 2021     |

|                      |                                                |        |     |    |     |                                                     |
|----------------------|------------------------------------------------|--------|-----|----|-----|-----------------------------------------------------|
|                      | 30 Sep 2020                                    |        |     |    |     |                                                     |
| Case 11<br>(Omicron) | Holiday Party,<br>Oslo, Norway, 30<br>Nov 2021 | 1062.7 | 111 | 80 | 72% | Norwegian<br>Institute of<br>Public<br>Health, 2021 |

**Table 2. Reported COVID-19 transmission events.**
